# Supplementary material for: Asymmetric Michael addition of α-fluoro-α-nitro esters to nitroolefins: towards synthesis of α-fluoro-α-substituted amino acids
Source: Royal Society of Chemistry journal article supplement (doi:10.1039/c4ob02486a), 2015-01-01

# **Asymmetric Michael addition of $\alpha$ -fluoro- $\alpha$ -nitro esters to nitroolefins: towards synthesis of $\alpha$ -fluoro- $\alpha$ -substituted amino acids**

Jacek Kwiatkowski and Yixin Lu\*

## **Supporting Information**

|                                                                                           |    |
|-------------------------------------------------------------------------------------------|----|
| <b>A.</b> HPLC Chromatograms of the Michael Reaction Products                             | 2  |
| <b>B.</b> HPLC Chromatogram of the Mannich Addition Product                               | 18 |
| <b>C.</b> X-Ray Crystallographic Analysis and Determination of Configurations of Products | 20 |
| <b>D.</b> NMR Spectra of the Michael Reaction Products                                    | 25 |
| <b>E.</b> NMR Spectra of the Derivatives and Mannich Addition Product                     | 76 |

## A. HPLC Chromatograms of the Michael Reaction Products

Enantiomeric excesses were successfully assessed for major diastereomers of all products (as shown in table 2 in the article). Attempts were made to assess the ee values for minor diastereomers in cases where dr value was lower than 3:1; however in isolated examples were unsuccessful.

### (2S,3S)-Ethyl 2-fluoro-2,4-dinitro-3-phenylbutanoate (3a)

Diastereomers of the chiral product were separated. Initial attempts to resolve the enantiomers of the minor diastereomer on HPLC were unsuccessful and not continued.

#### Racemic mixture of diastereomers

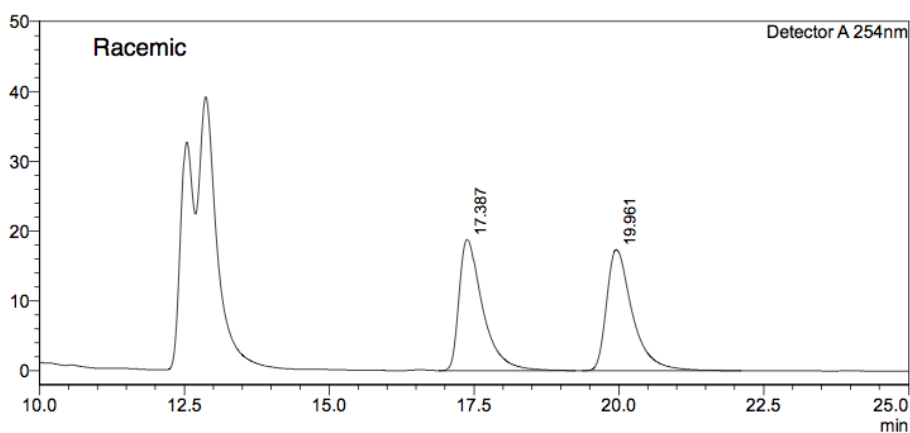

#### <Peak Table>

| Detector A 254nm |           |         |
|------------------|-----------|---------|
| Peak#            | Ret. Time | Area%   |
| 1                | 17.387    | 49.811  |
| 2                | 19.961    | 50.189  |
| Total            |           | 100.000 |

#### Major diastereomer

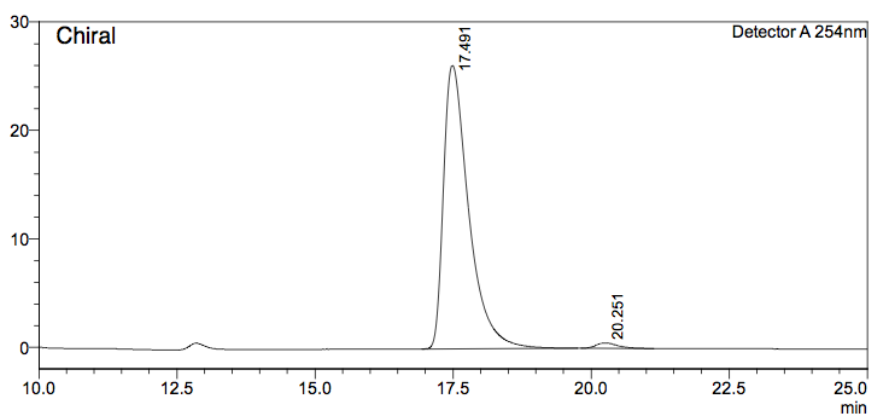

#### <Peak Table>

| Detector A 254nm |           |         |
|------------------|-----------|---------|
| Peak#            | Ret. Time | Area%   |
| 1                | 17.491    | 98.329  |
| 2                | 20.251    | 1.671   |
| Total            |           | 100.000 |

### (2S,3S)-Isopropyl 3-(3-bromophenyl)-2-fluoro-2,4-dinitrobutanoate (3b)

Diastereomers of the chiral and racemic products were separated. Initial attempts to resolve the enantiomers of the minor diastereomer on HPLC were unsuccessful and not continued.

#### Major diastereomer, racemate (3b)

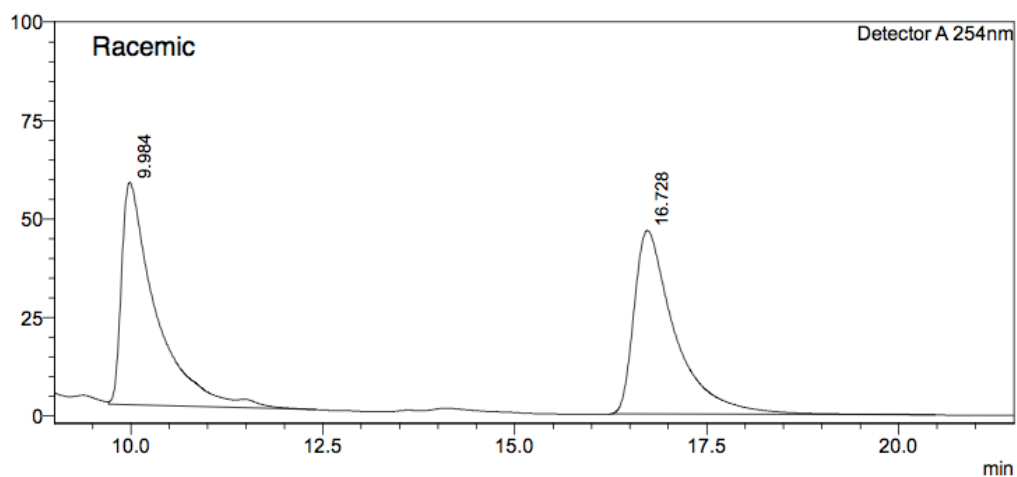

#### <Peak Table>

| Detector A 254nm |           |         |
|------------------|-----------|---------|
| Peak#            | Ret. Time | Area%   |
| 1                | 9.984     | 50.301  |
| 2                | 16.728    | 49.699  |
| Total            |           | 100.000 |

#### Major diastereomer, chiral (3b)

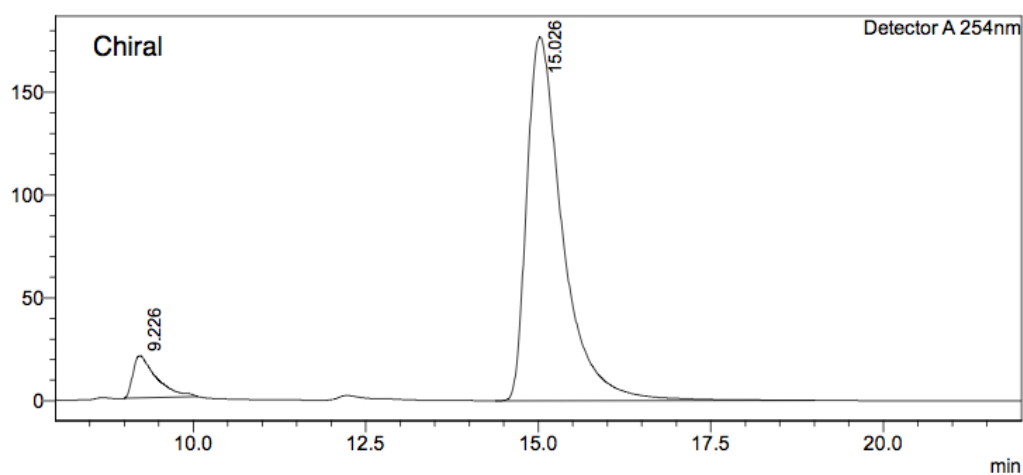

#### <Peak Table>

| Detector A 254nm |           |         |
|------------------|-----------|---------|
| Peak#            | Ret. Time | Area%   |
| 1                | 9.226     | 7.065   |
| 2                | 15.026    | 92.935  |
| Total            |           | 100.000 |

### (2S,3S)-Ethyl 2-fluoro-3-(naphthalen-2-yl)-2,4-dinitrobutanoate (3c)

Diastereomers of the chiral and racemic products were separated. Initial attempts to resolve the enantiomers of the minor diastereomer on HPLC were unsuccessful and not continued.

#### Major diastereomer, racemate (3c)

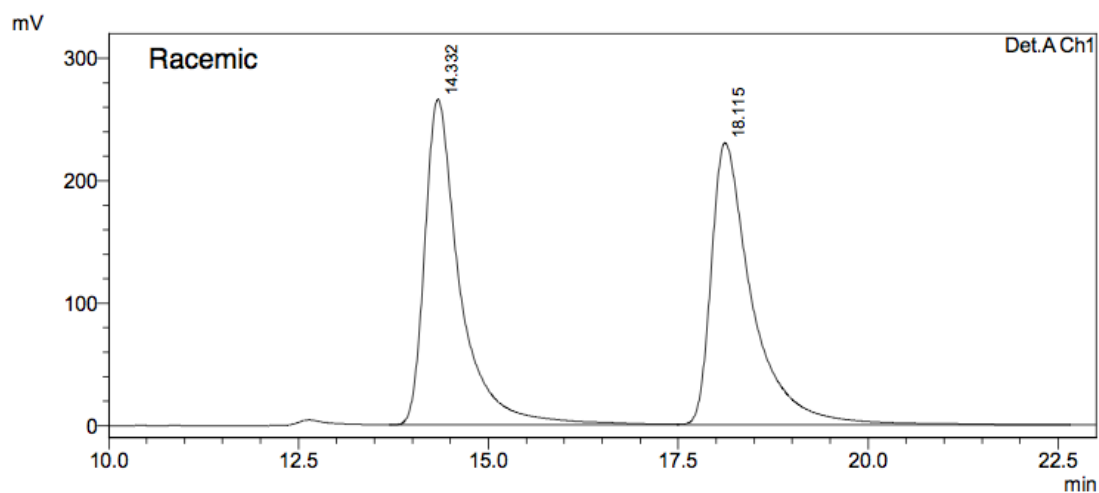

PeakTable

| Detector A Ch1 254nm |           |          |         |
|----------------------|-----------|----------|---------|
| Peak#                | Ret. Time | Area     | Area %  |
| 1                    | 14.332    | 8621081  | 49.818  |
| 2                    | 18.115    | 8684180  | 50.182  |
| Total                |           | 17305261 | 100.000 |

#### Major diastereomer, chiral (3c)

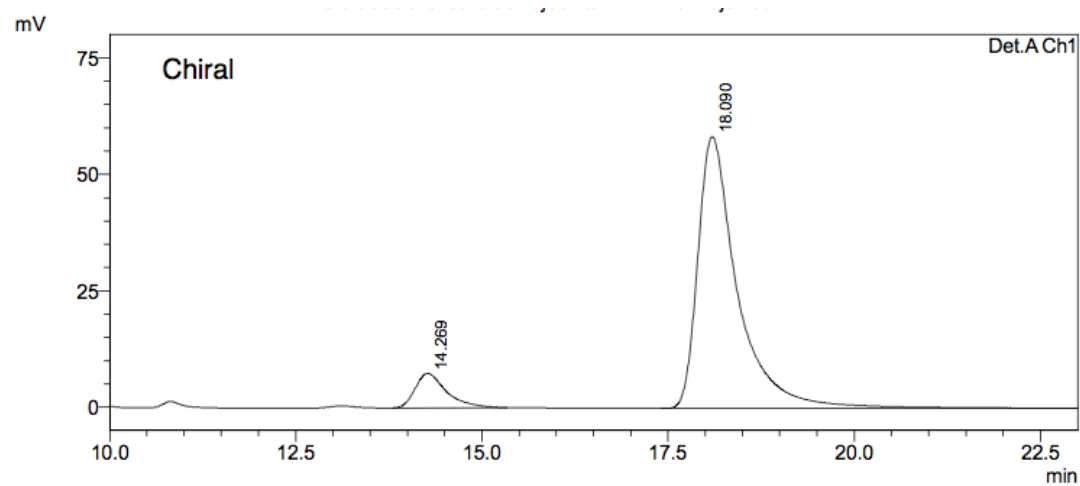

PeakTable

| Detector A Ch1 254nm |           |         |         |
|----------------------|-----------|---------|---------|
| Peak#                | Ret. Time | Area    | Area %  |
| 1                    | 14.269    | 217393  | 9.066   |
| 2                    | 18.090    | 2180506 | 90.934  |
| Total                |           | 2397899 | 100.000 |

### (2S,3S)-Ethyl 2-fluoro-2,4-dinitro-3-(4-(trifluoromethyl)phenyl)butanoate (3d)

Diastereomers of the chiral product were separated. Initial attempts to resolve the enantiomers of the minor diastereomer on HPLC were unsuccessful and not continued.

#### Racemic mixture of diastereomers

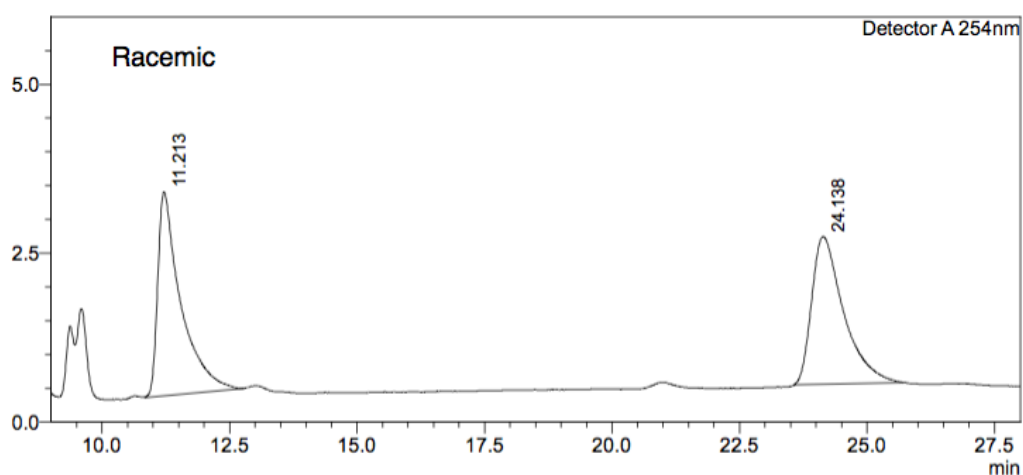

#### <Peak Table>

| Detector A 254nm |           |         |
|------------------|-----------|---------|
| Peak#            | Ret. Time | Area%   |
| 1                | 11.213    | 49.905  |
| 2                | 24.138    | 50.095  |
| Total            |           | 100.000 |

#### Major diastereomer ((2S,3S), (3d))

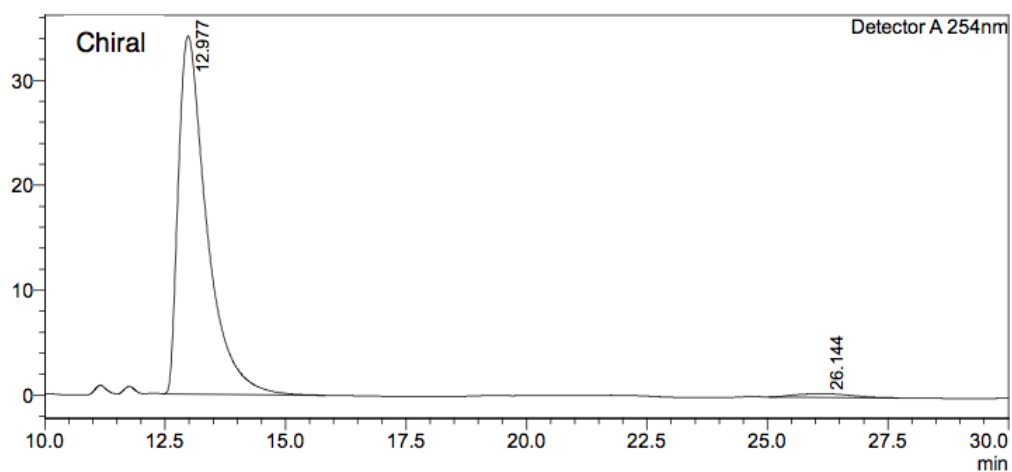

#### <Peak Table>

| Detector A 254nm |           |         |
|------------------|-----------|---------|
| Peak#            | Ret. Time | Area%   |
| 1                | 12.977    | 98.012  |
| 2                | 26.144    | 1.988   |
| Total            |           | 100.000 |

### (2S,3S)-Ethyl 2-fluoro-2,4-dinitro-3-(*p*-tolyl)butanoate (**3e**)

Diastereomers of the chiral and racemic products were separated. Initial attempts to resolve the enantiomers of the minor diastereomer on HPLC were unsuccessful and not continued.

#### Major diastereomer, racemate (**3e**)

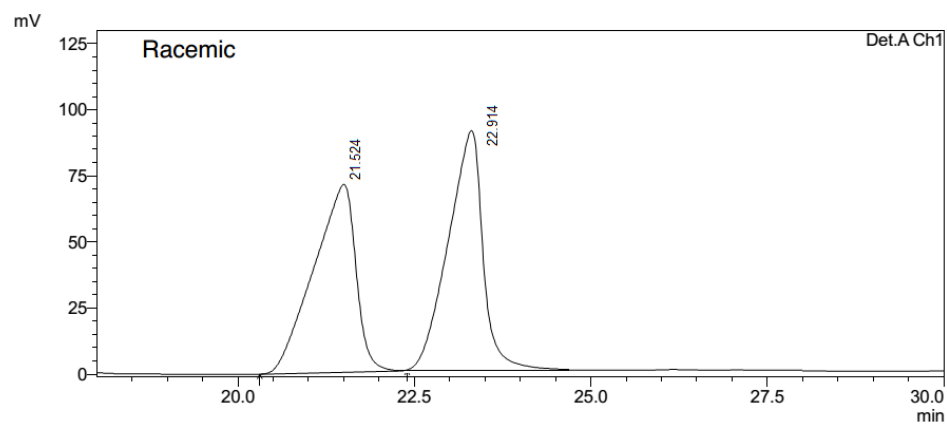

1 Det.A Ch1/254nm

PeakTable  
Detector A Ch1 254nm

| Peak# | Ret. Time | Area %  |
|-------|-----------|---------|
| 1     | 21.524    | 49.956  |
| 2     | 22.914    | 50.044  |
| Total |           | 100.000 |

#### Major diastereomer, chiral (**3e**)

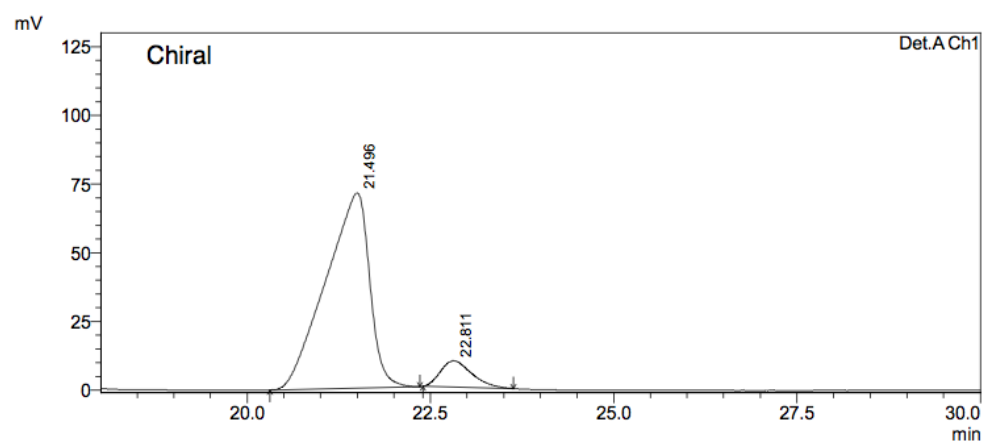

1 Det.A Ch1/254nm

PeakTable  
Detector A Ch1 254nm

| Peak# | Ret. Time | Area %  |
|-------|-----------|---------|
| 1     | 21.496    | 91.250  |
| 2     | 22.811    | 8.750   |
| Total |           | 100.000 |

**(2S,3S)-Ethyl 3-(3-bromophenyl)-2-fluoro-2,4-dinitrobutanoate (3f)**

Diastereomers of the chiral product were separated.

**Racemic mixture of diastereomers**

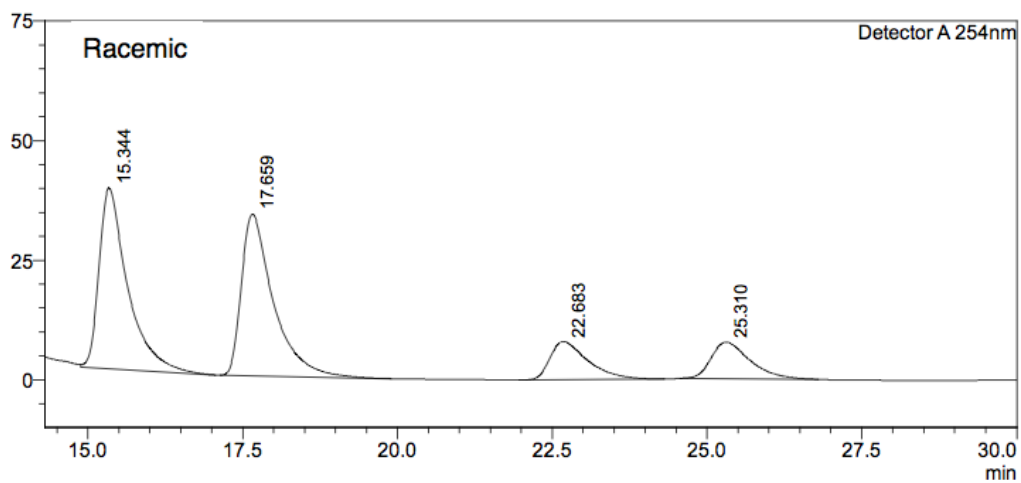

**<Peak Table>**

| Detector A 254nm |           |         |
|------------------|-----------|---------|
| Peak#            | Ret. Time | Area%   |
| 1                | 15.344    | 39.119  |
| 2                | 17.659    | 39.140  |
| 3                | 22.683    | 10.931  |
| 4                | 25.310    | 10.810  |
| Total            |           | 100.000 |

**Major diastereomer ((2S,3S), 3f)**

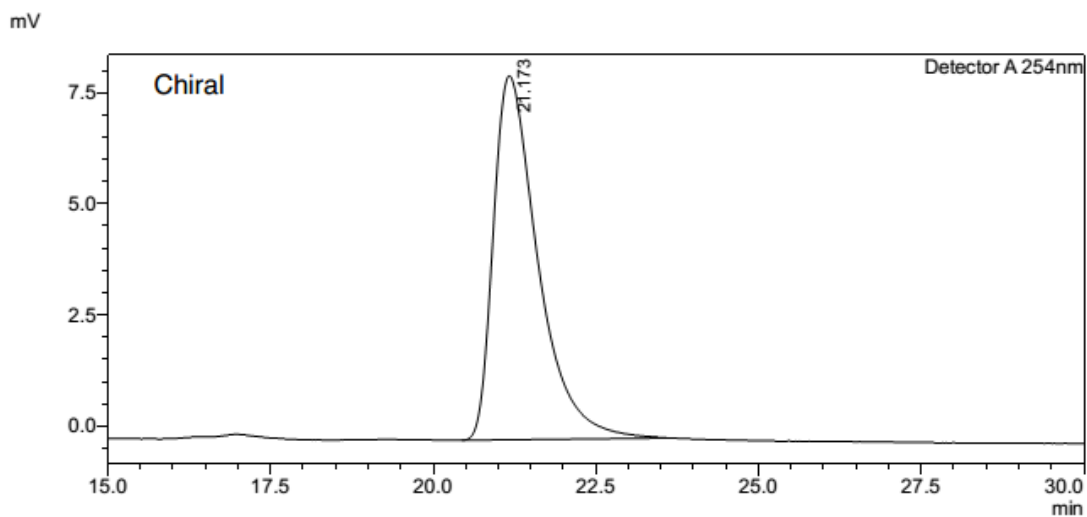

**<Peak Table>**

| Detector A 254nm |           |         |
|------------------|-----------|---------|
| Peak#            | Ret. Time | Area%   |
| 1                | 21.173    | 100.000 |
| Total            |           | 100.000 |

### (2S,3S)-Ethyl 2-fluoro-3-(2-fluorophenyl)-2,4-dinitrobutanoate (3g)

Diastereomers were separated in the chiral sample. Resolution on HPLC of enantiomers of both diastereomers was achieved.

#### Racemic mixture of diastereomers

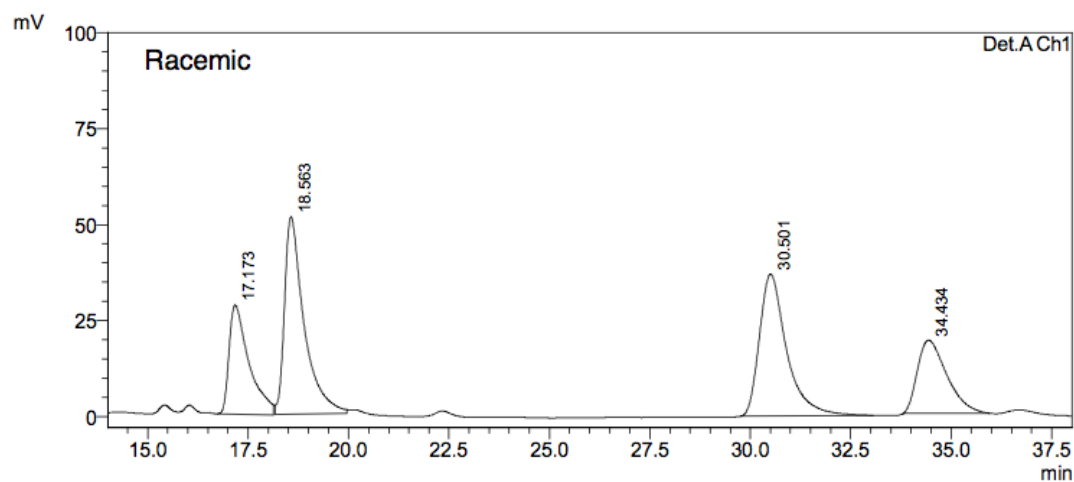

1 Det.A Ch1/254nm

PeakTable

Detector A Ch1 254nm

| Peak# | Ret. Time | Area    | Area %  |
|-------|-----------|---------|---------|
| 1     | 17.173    | 977253  | 18.030  |
| 2     | 18.563    | 1738428 | 32.073  |
| 3     | 30.501    | 1739350 | 32.090  |
| 4     | 34.434    | 965143  | 17.806  |
| Total |           | 5420174 | 100.000 |

#### Major diastereomer (3g)

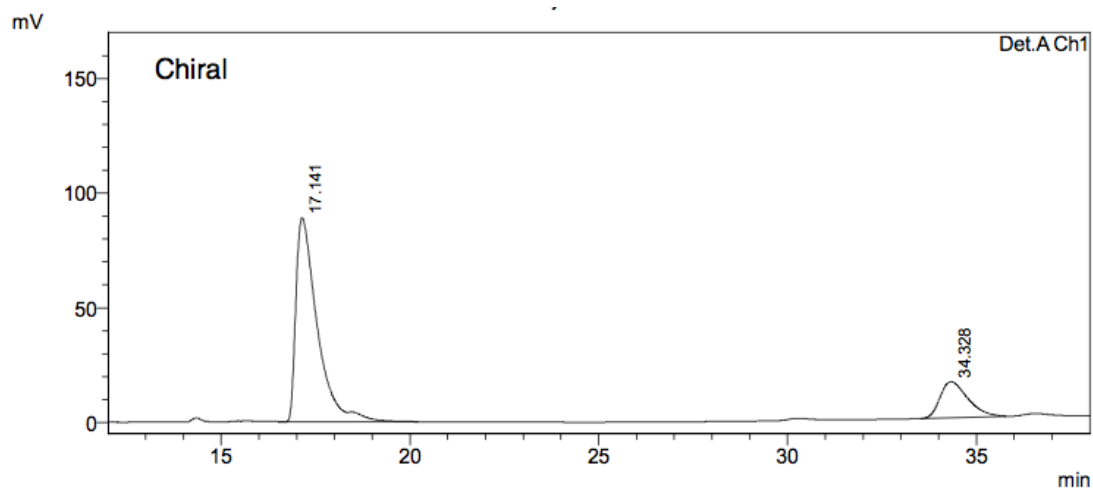

1 Det.A Ch1/254nm

PeakTable

Detector A Ch1 254nm

| Peak# | Ret. Time | Area    | Area %  |
|-------|-----------|---------|---------|
| 1     | 17.141    | 3498084 | 81.405  |
| 2     | 34.328    | 799028  | 18.595  |
| Total |           | 4297112 | 100.000 |



### Racemic mixture of diastereomers

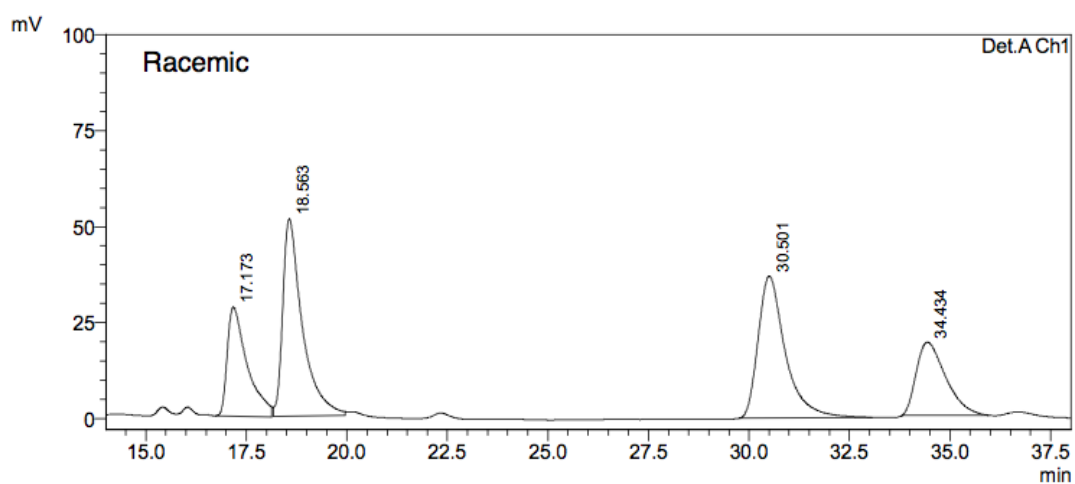

1 Det.A Ch1/254nm

PeakTable

| Peak# | Ret. Time | Area    | Area %  |
|-------|-----------|---------|---------|
| 1     | 17.173    | 977253  | 18.030  |
| 2     | 18.563    | 1738428 | 32.073  |
| 3     | 30.501    | 1739350 | 32.090  |
| 4     | 34.434    | 965143  | 17.806  |
| Total |           | 5420174 | 100.000 |

### Minor diastereomer (3g')

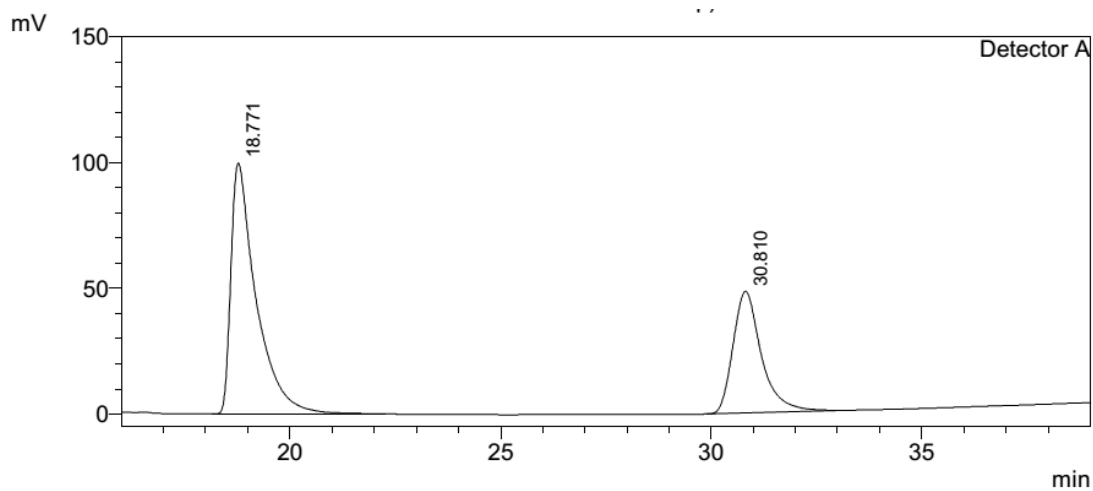

1 Detector A/254nm

PeakTable

| Peak# | Ret. Time | Area    | Area %  |
|-------|-----------|---------|---------|
| 1     | 18.771    | 4148101 | 64.749  |
| 2     | 30.810    | 2258300 | 35.251  |
| Total |           | 6406401 | 100.000 |

### (2S,3S)-Ethyl 3-(3,4-dichlorophenyl)-2-fluoro-2,4-dinitrobutanoate (3h)

Resolution on HPLC of enantiomers of both diastereomers was achieved. The diastereomers were separated prior to analysis.

#### Major diastereomer, racemate (3h)

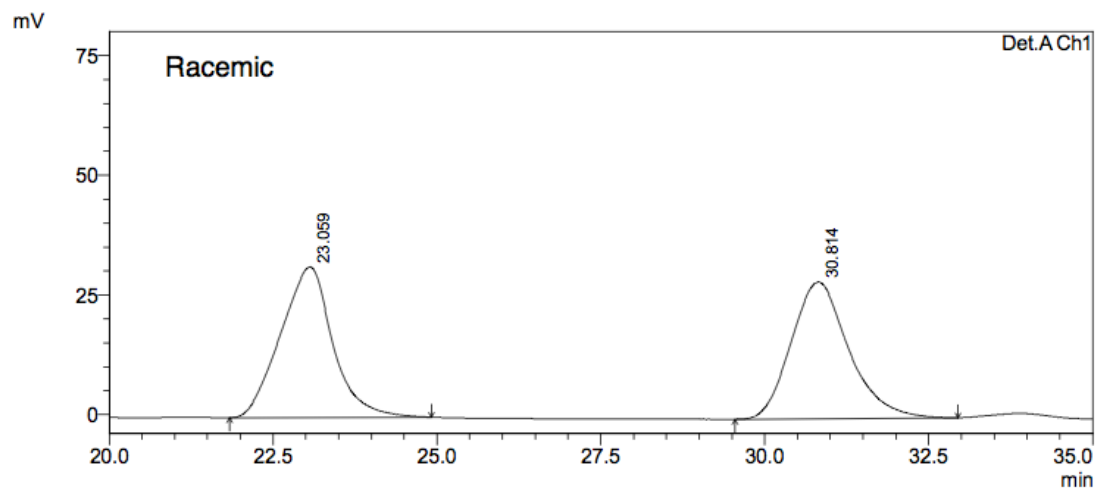

1 Det.A Ch1/254nm

PeakTable

Detector A Ch1 254nm

| Peak# | Ret. Time | Area    | Area %  |
|-------|-----------|---------|---------|
| 1     | 23.059    | 1746303 | 50.027  |
| 2     | 30.814    | 1744427 | 49.973  |
| Total |           | 3490730 | 100.000 |

#### Major diastereomer, chiral (3h)

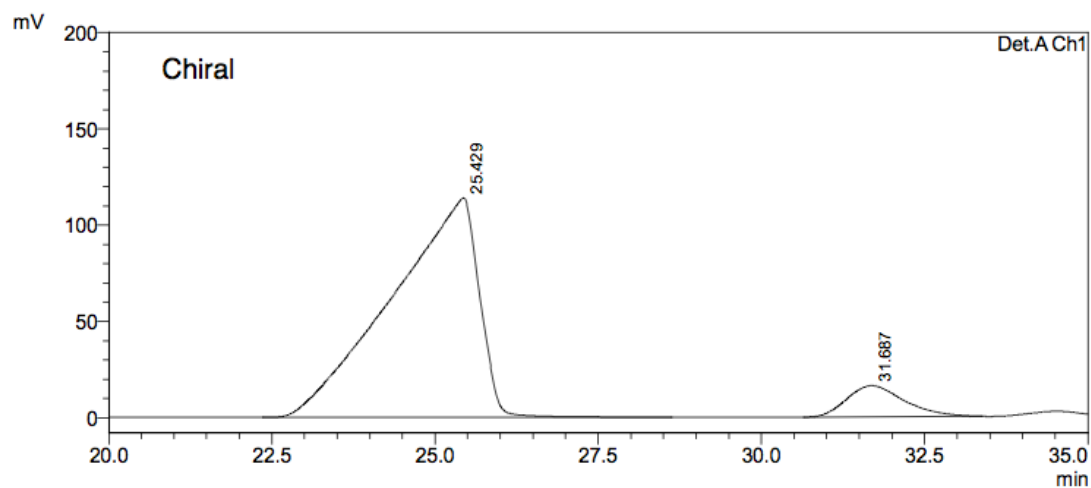

1 Det.A Ch1/254nm

PeakTable

Detector A Ch1 254nm

| Peak# | Ret. Time | Area     | Area %  |
|-------|-----------|----------|---------|
| 1     | 25.429    | 10613494 | 91.393  |
| 2     | 31.687    | 999594   | 8.607   |
| Total |           | 11613088 | 100.000 |

### Minor diastereomer, racemate (3h')

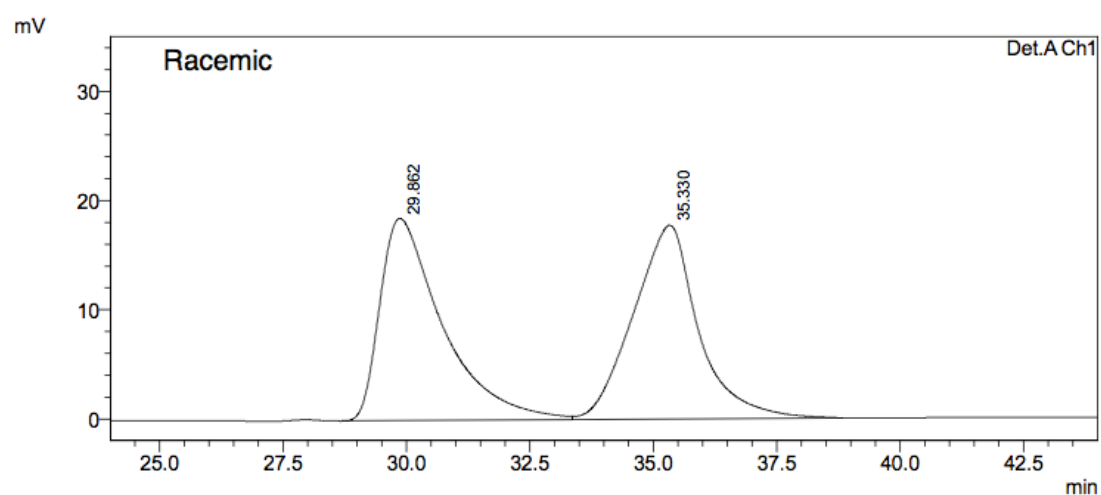

1 Det.A Ch1/254nm

PeakTable

Detector A Ch1 254nm

| Peak# | Ret. Time | Area    | Area %  |
|-------|-----------|---------|---------|
| 1     | 29.862    | 1633957 | 50.052  |
| 2     | 35.330    | 1630534 | 49.948  |
| Total |           | 3264490 | 100.000 |

### Minor diastereomer, chiral (3h')

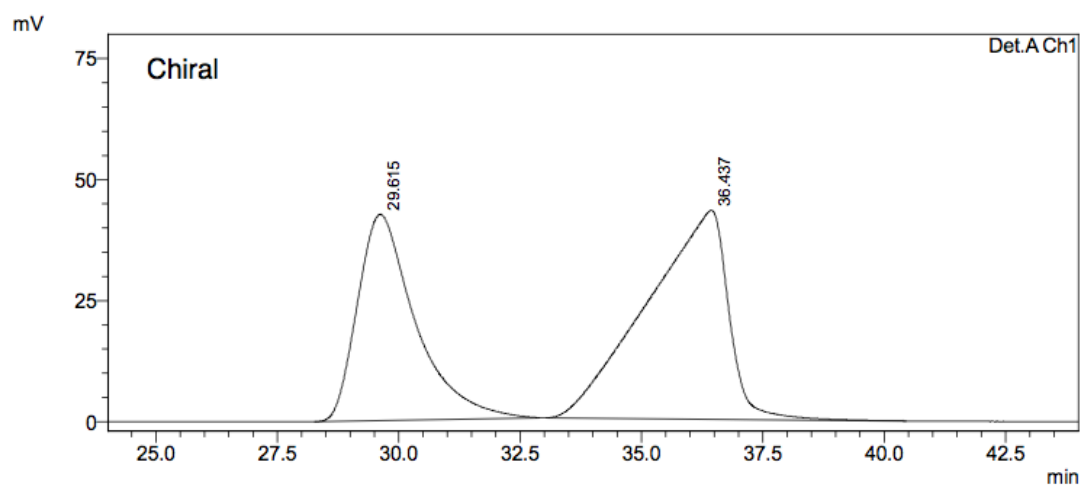

1 Det.A Ch1/254nm

PeakTable

Detector A Ch1 254nm

| Peak# | Ret. Time | Area    | Area %  |
|-------|-----------|---------|---------|
| 1     | 29.615    | 3545382 | 41.289  |
| 2     | 36.437    | 5041319 | 58.711  |
| Total |           | 8586700 | 100.000 |

### (2S,3S)-Ethyl 3-(3,4-dimethoxyphenyl)-2-fluoro-2,4-dinitrobutanoate (3i)

Diastereomers of the chiral and racemic products could not be fully separated. Attempts to resolve the enantiomers of the minor diastereomer on HPLC were unsuccessful. Major diastereomer was identified based on comparison of intensities of light absorption between racemic sample and enantio- and diastereo-enriched sample.

#### Racemic mixture of diastereomers 3i)

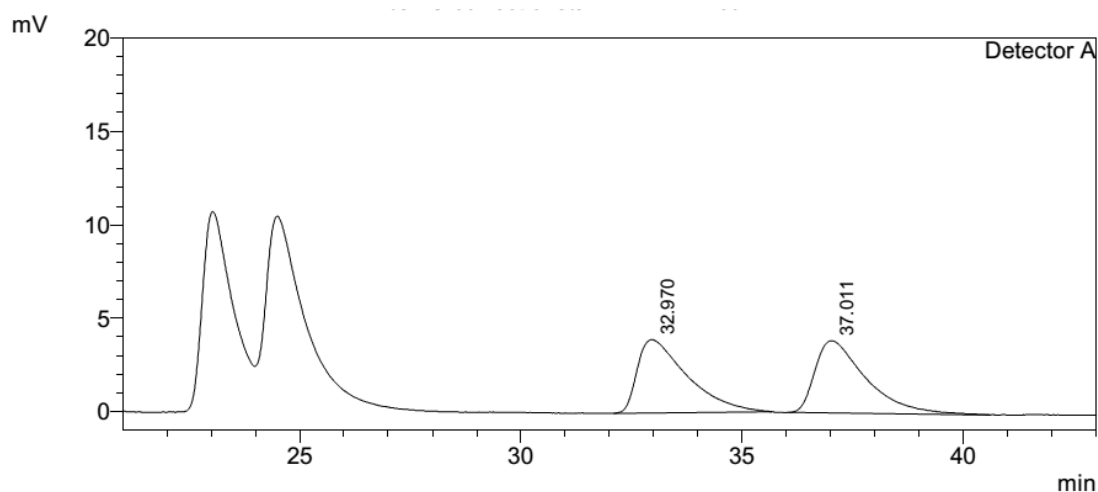

1 Detector A/254nm

PeakTable

Detector A 254nm

| Peak# | Ret. Time | Area   | Area %  |
|-------|-----------|--------|---------|
| 1     | 32.970    | 307614 | 49.902  |
| 2     | 37.011    | 308825 | 50.098  |
| Total |           | 616439 | 100.000 |

#### Chiral mixture of diastereomers (3i)

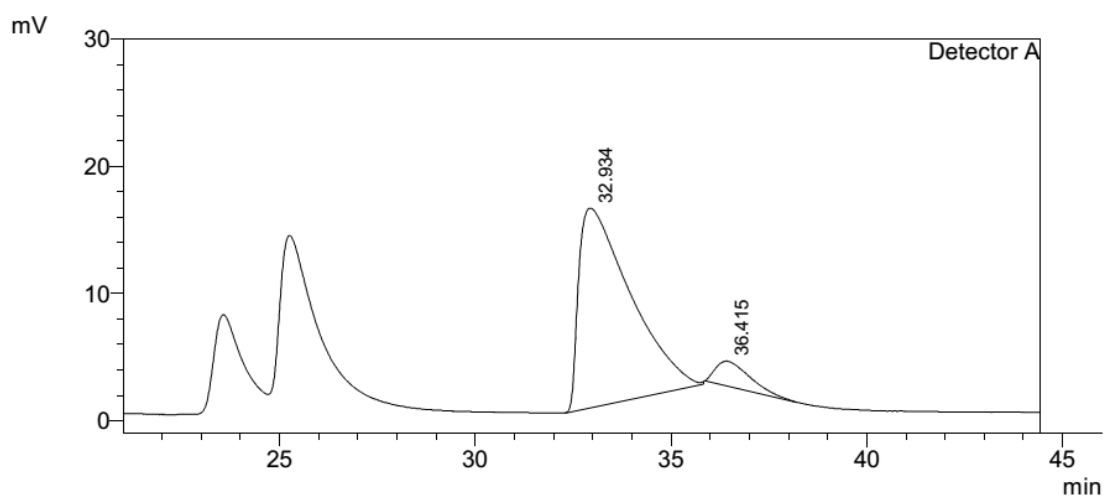

1 Detector A/254nm

PeakTable

Detector A 254nm

| Peak# | Ret. Time | Area    | Area %  |
|-------|-----------|---------|---------|
| 1     | 32.934    | 1436144 | 92.290  |
| 2     | 36.415    | 119976  | 7.710   |
| Total |           | 1556120 | 100.000 |

### (2S,3S)-Ethyl 3-(3,5-difluorophenyl)-2-fluoro-2,4-dinitrobutanoate (3j)

Diastereomers of the chiral and racemic products were separated. Initial attempts to resolve the enantiomers of the minor diastereomer on HPLC were unsuccessful.

#### Major diastereomer, racemate (3j)

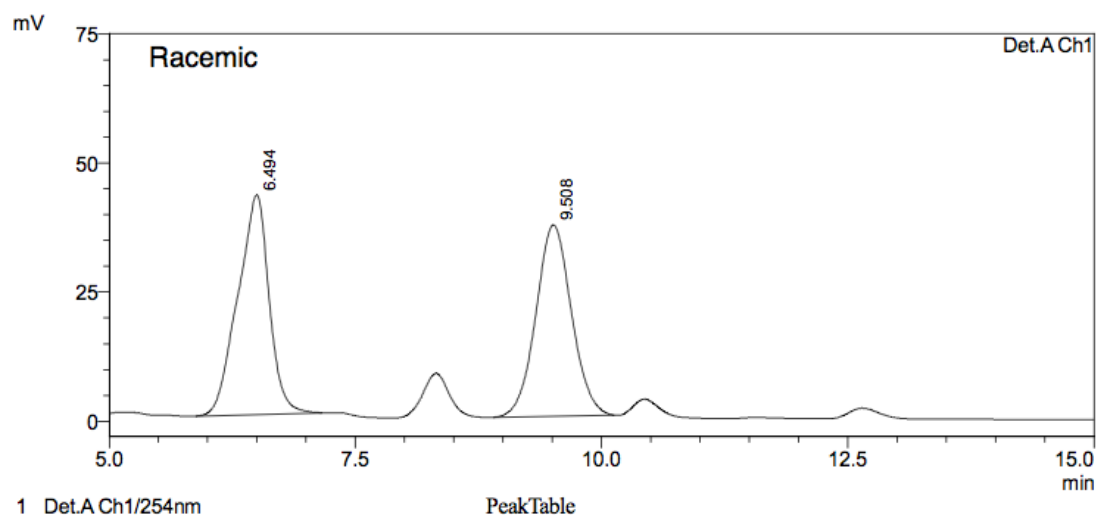

PeakTable

| Peak# | Ret. Time | Area    | Area %  |
|-------|-----------|---------|---------|
| 1     | 6.494     | 941318  | 50.285  |
| 2     | 9.508     | 930637  | 49.715  |
| Total |           | 1871955 | 100.000 |

#### Major diastereomer, chiral (3j)

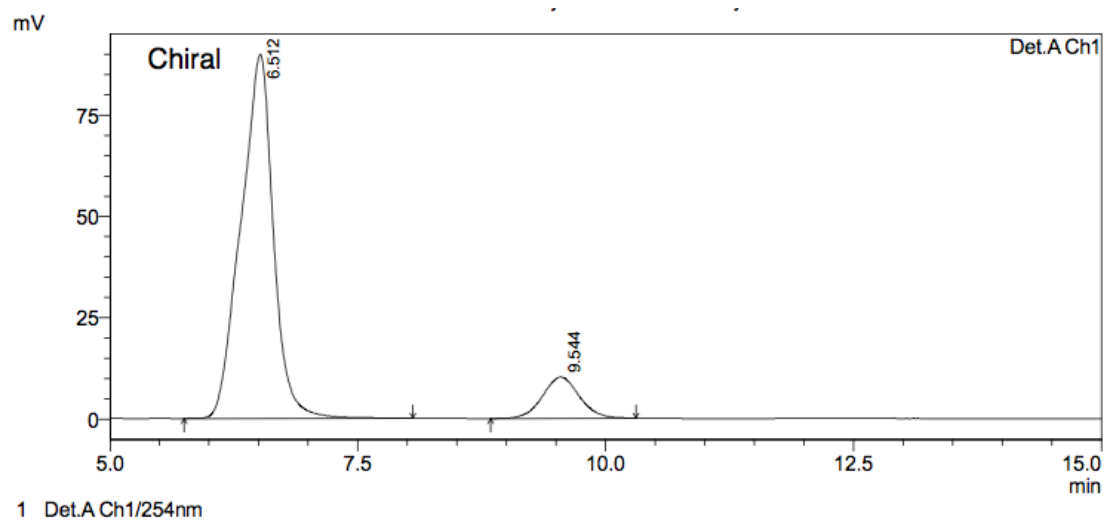

PeakTable

| Peak# | Ret. Time | Area    | Area %  |
|-------|-----------|---------|---------|
| 1     | 6.512     | 2047454 | 88.635  |
| 2     | 9.544     | 262523  | 11.365  |
| Total |           | 2309976 | 100.000 |

### (2S,3R)-Ethyl 2-fluoro-3-(furan-2-yl)-2,4-dinitrobutanoate (3k)

Diastereomers of the chiral and racemic products could not be fully separated. Resolution on HPLC of enantiomers of both diastereomers was achieved.

#### Mixture of racemic diastereomers (3k)

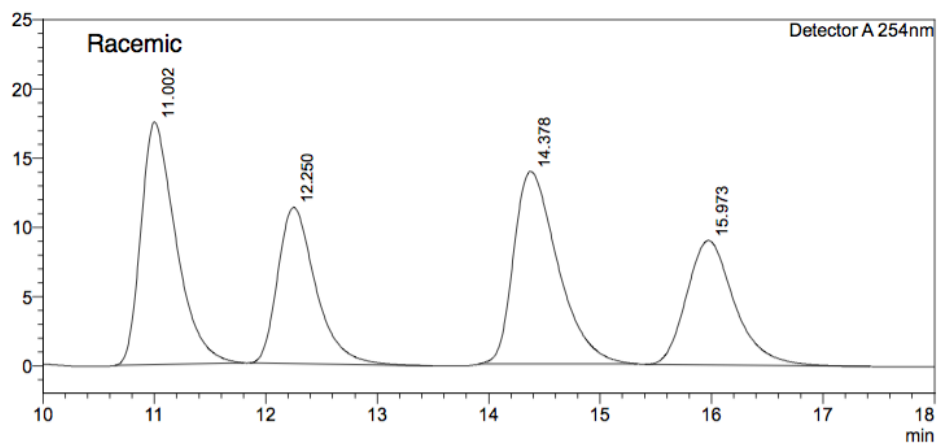

| Peak# | Ret. Time | Area%   |
|-------|-----------|---------|
| 1     | 11.002    | 29.324  |
| 2     | 12.250    | 20.551  |
| 3     | 14.378    | 29.449  |
| 4     | 15.973    | 20.676  |
| Total |           | 100.000 |

#### Major diastereomer ((2S,3R), 3k)

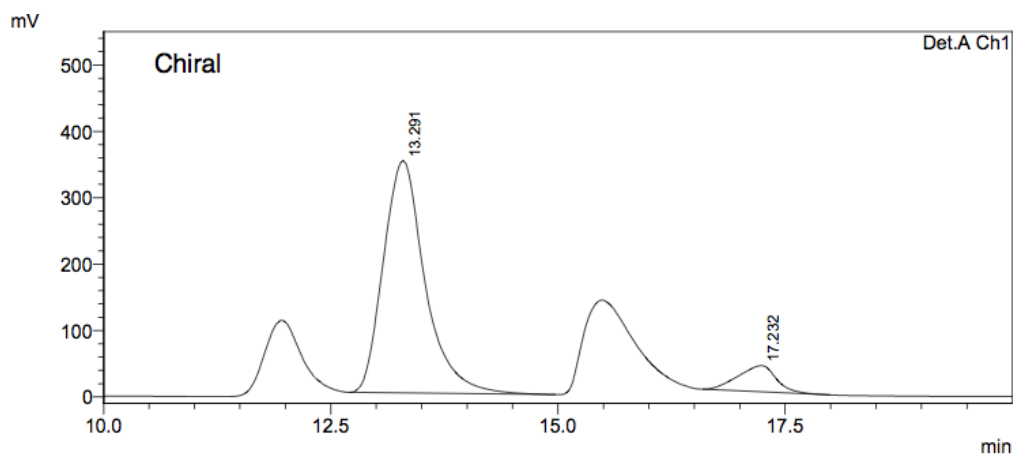

1 Det.A Ch1/254nm

| PeakTable            |           |         |
|----------------------|-----------|---------|
| Detector A Ch1 254nm |           |         |
| Peak#                | Ret. Time | Area %  |
| 1                    | 13.291    | 90.598  |
| 2                    | 17.232    | 9.402   |
| Total                |           | 100.000 |

**Minor diastereomer ((2R,3R), 3k')**

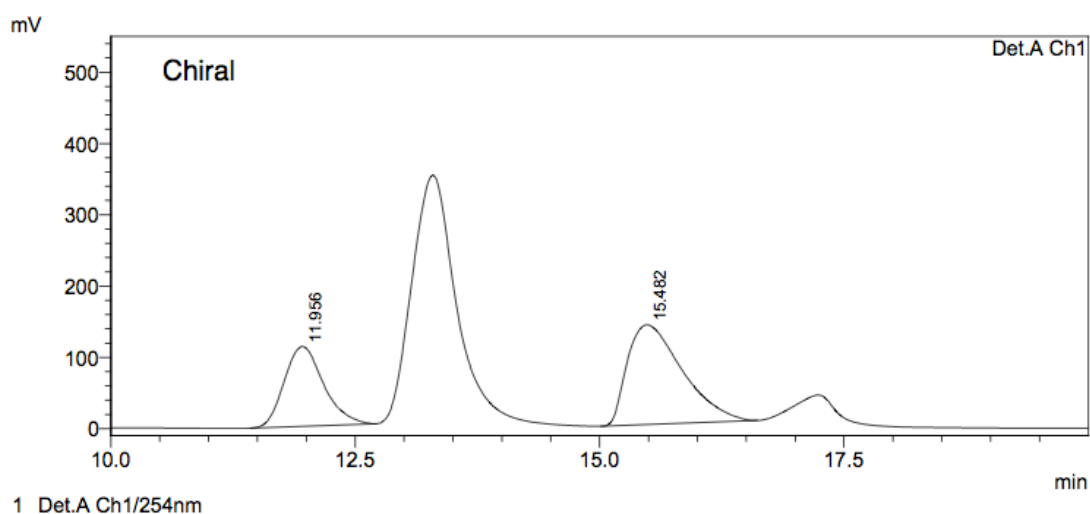

1 Det.A Ch1/254nm

PeakTable  
Detector A Ch1 254nm

| Peak# | Ret. Time | Area %  |
|-------|-----------|---------|
| 1     | 11.956    | 36.434  |
| 2     | 15.482    | 63.566  |
| Total |           | 100.000 |

**(2S,3S)-Ethyl 2-fluoro-2-nitro-3-(nitromethyl)-5-phenylpentanoate (3l)**

Diastereomers of the chiral and racemic products were separated. Attempts to resolve the enantiomers of the minor diastereomer on HPLC were partially successful. Enantiomers of the major diastereomer were fully resolved on HPLC.

**Racemic, both diastereomers of 3l**

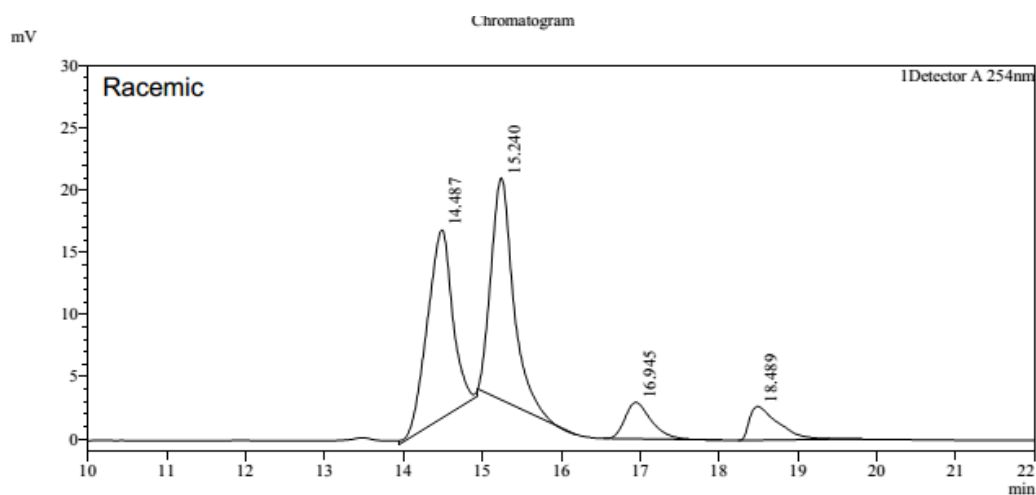

**<Peak Table>**

Detector A 254nm

| Peak# | Ret. Time | Area%   |
|-------|-----------|---------|
| 1     | 14.487    | 40.842  |
| 2     | 15.240    | 42.564  |
| 3     | 16.945    | 8.288   |
| 4     | 18.489    | 8.307   |
| Total |           | 100.000 |

Diastereomeric mixture of the chiral sample (3I), prior to separation of diastereomers.

Major diastereomer ((2S,3S), 3I)

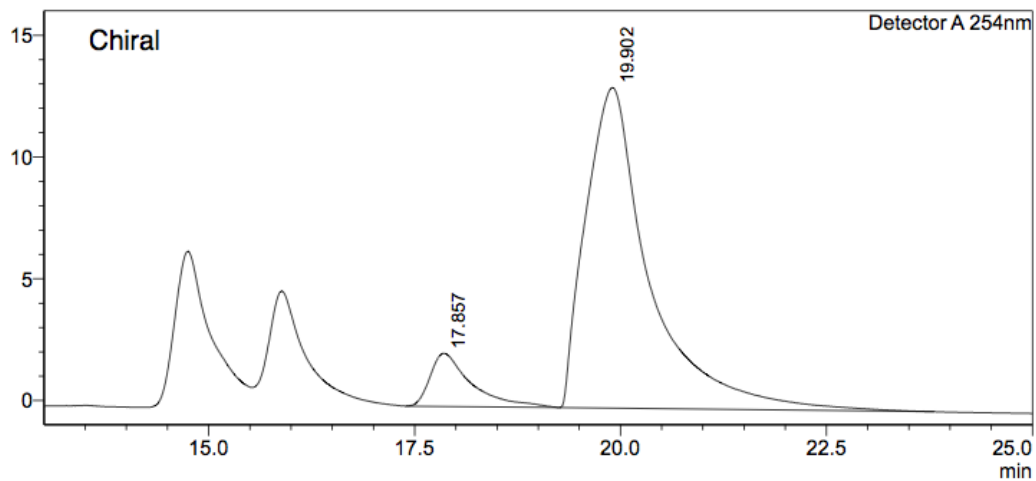

<Peak Table>

| Detector A 254nm |           |         |
|------------------|-----------|---------|
| Peak#            | Ret. Time | Area%   |
| 1                | 17.857    | 9.657   |
| 2                | 19.902    | 90.343  |
| Total            |           | 100.000 |

Minor diastereomer ((2R,3S), 3I')

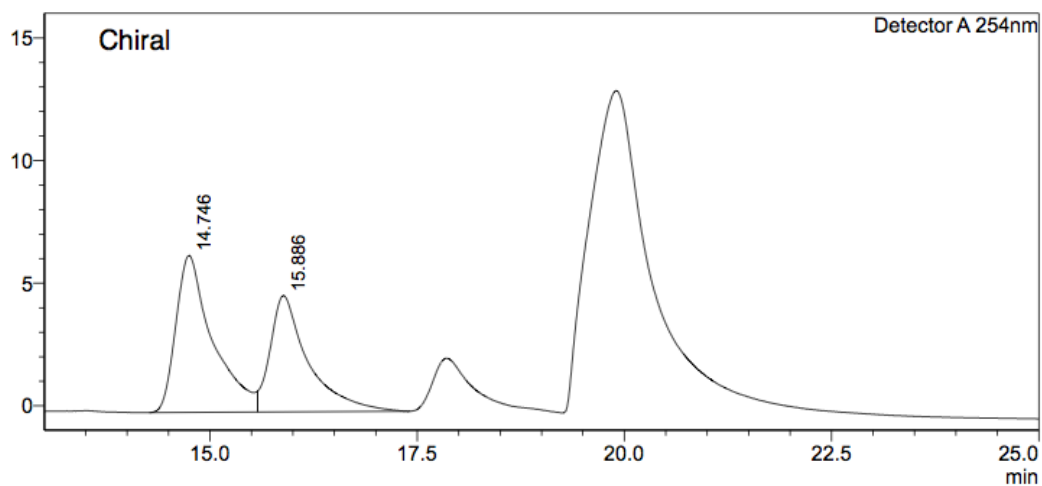

<Peak Table>

| Detector A 254nm |           |         |
|------------------|-----------|---------|
| Peak#            | Ret. Time | Area%   |
| 1                | 14.746    | 56.769  |
| 2                | 15.886    | 43.231  |
| Total            |           | 100.000 |



**(2S,3S)-Ethyl 2-fluoro-4-methyl-2-nitro-3-(nitromethyl)pentanoate (3m, major), (2R,3S)-Ethyl 2-fluoro-4-methyl-2-nitro-3-(nitromethyl)pentanoate (3m', minor); (diastereomeric mixture)**

Diastereomers of the chiral and racemic products could not be fully separated. Resolution on HPLC of enantiomers of both diastereomers was achieved.

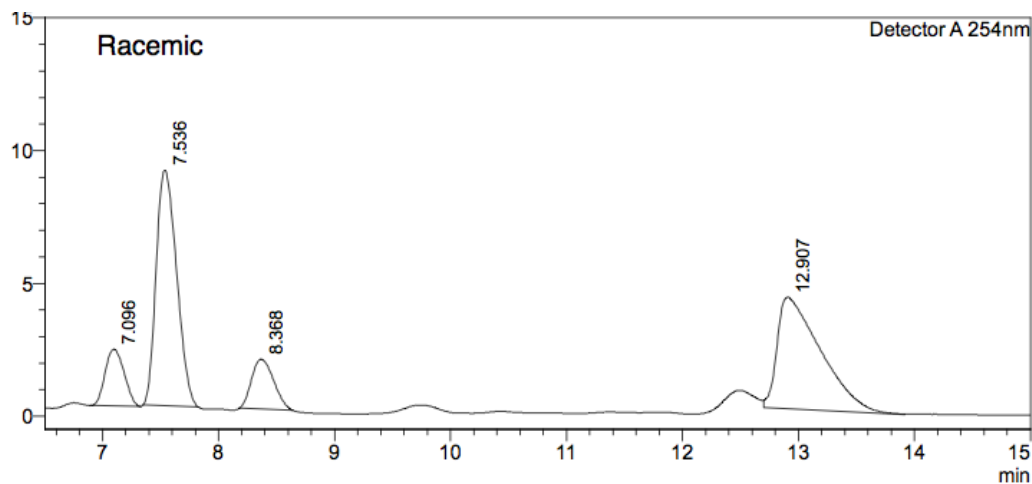

**<Peak Table>**

| Detector A 254nm |           |         |
|------------------|-----------|---------|
| Peak#            | Ret. Time | Area%   |
| 1                | 7.096     | 9.129   |
| 2                | 7.536     | 40.729  |
| 3                | 8.368     | 9.211   |
| 4                | 12.907    | 40.932  |
| Total            |           | 100.000 |

**Major diastereomer ((2S,3S), 3m)**

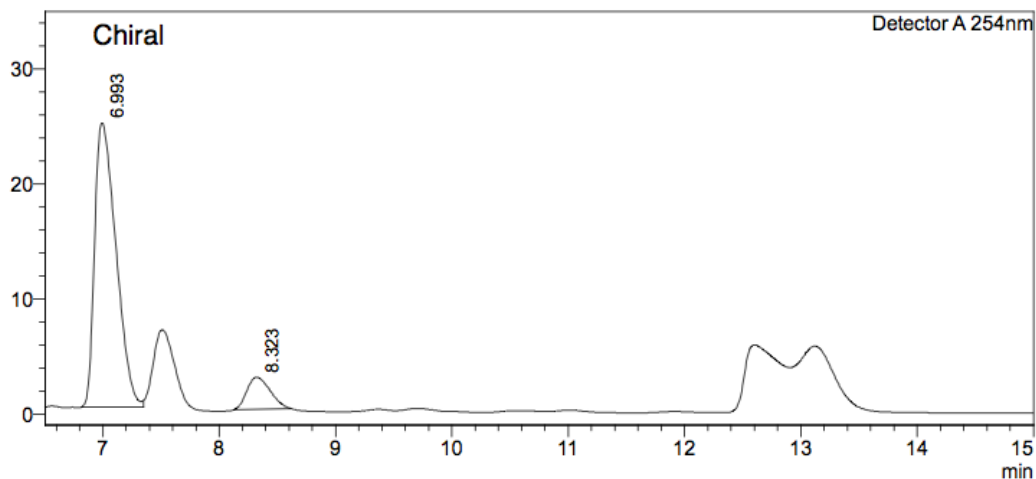

**<Peak Table>**

| Detector A 254nm |           |         |
|------------------|-----------|---------|
| Peak#            | Ret. Time | Area%   |
| 1                | 6.993     | 89.040  |
| 2                | 8.323     | 10.960  |
| Total            |           | 100.000 |

## B. HPLC chromatogram of the Mannich addition

### Ethyl 3-((tert-butoxycarbonyl)amino)-2-fluoro-2-nitro-3-phenylpropanoate (13)

Diastereomers of the chiral and racemic products could not be fully separated. Resolution on HPLC of enantiomers of both diastereomers was achieved.

#### Diastereomer 1 (13)

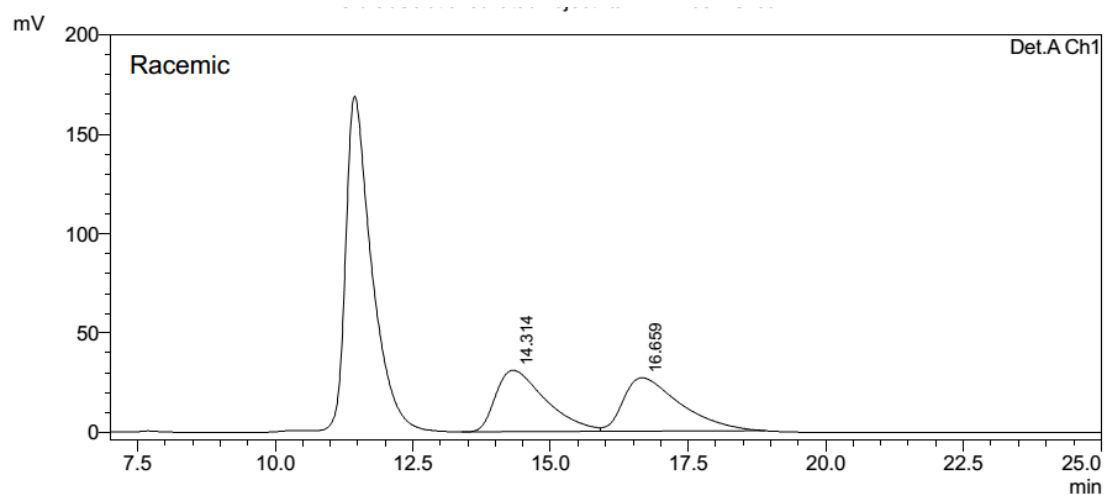

1 Det.A Ch1/254nm

PeakTable

Detector A Ch1 254nm

| Peak# | Ret. Time | Area %  |
|-------|-----------|---------|
| 1     | 14.314    | 50.008  |
| 2     | 16.659    | 49.992  |
| Total |           | 100.000 |

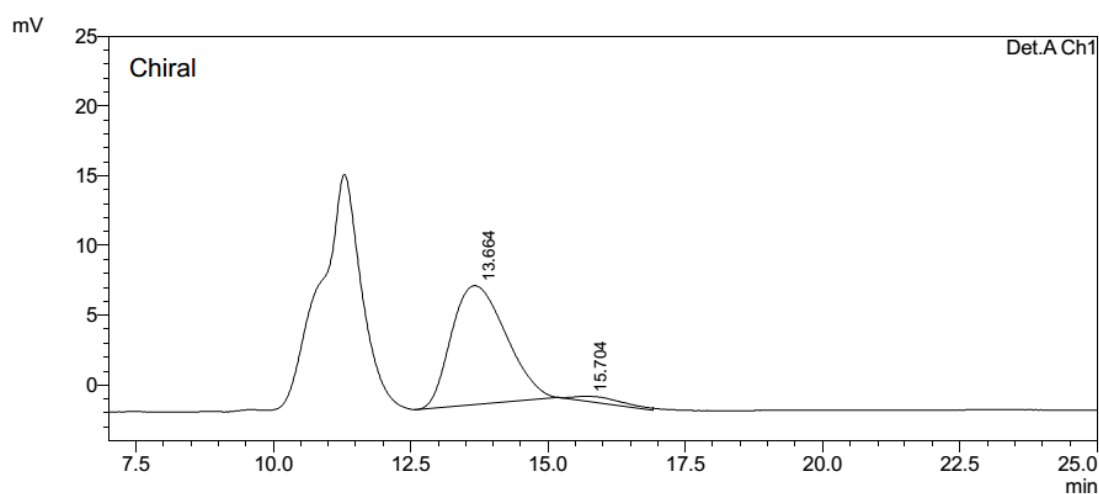

1 Det.A Ch1/254nm

PeakTable

Detector A Ch1 254nm

| Peak# | Ret. Time | Area %  |
|-------|-----------|---------|
| 1     | 13.664    | 95.802  |
| 2     | 15.704    | 4.198   |
| Total |           | 100.000 |

### Diastereomer 2 (13'), racemate

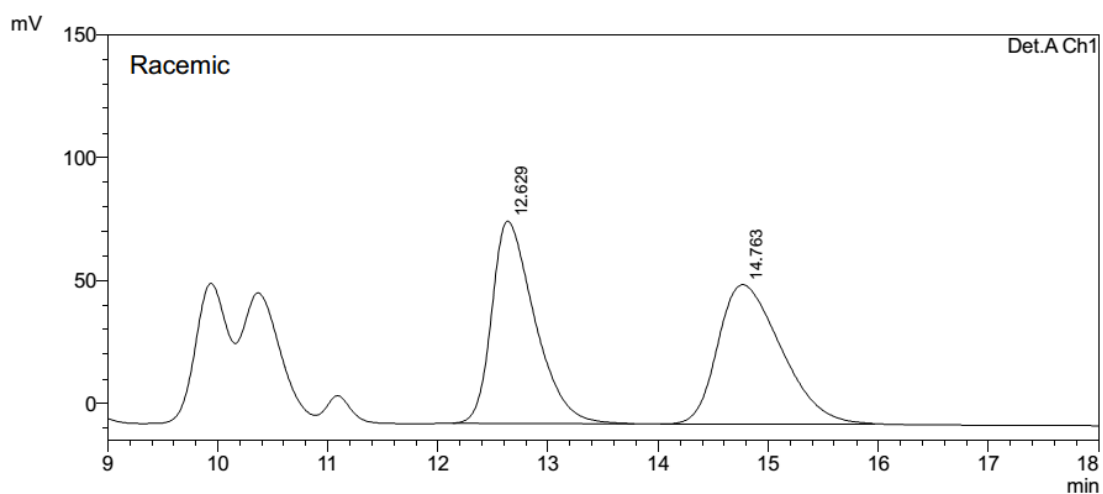

PeakTable  
Detector A Ch1 254nm

| Peak# | Ret. Time | Area %  |
|-------|-----------|---------|
| 1     | 12.629    | 49.706  |
| 2     | 14.763    | 50.294  |
| Total |           | 100.000 |

### Diastereomer 2 (13'), chiral

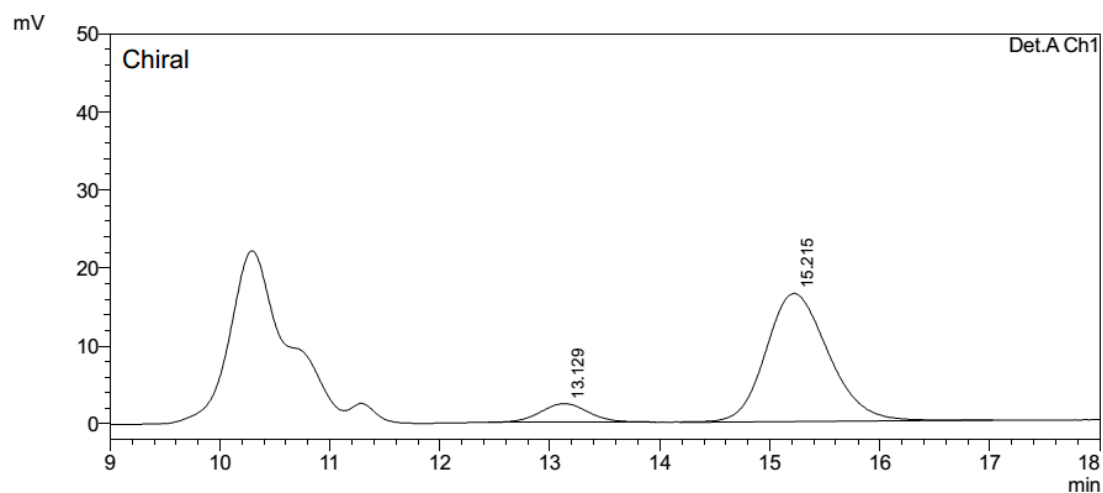

PeakTable  
Detector A Ch1 254nm

| Peak# | Ret. Time | Area %  |
|-------|-----------|---------|
| 1     | 13.129    | 10.141  |
| 2     | 15.215    | 89.859  |
| Total |           | 100.000 |

## C. X-Ray Crystallographic Analysis and Determination of Configurations of Products

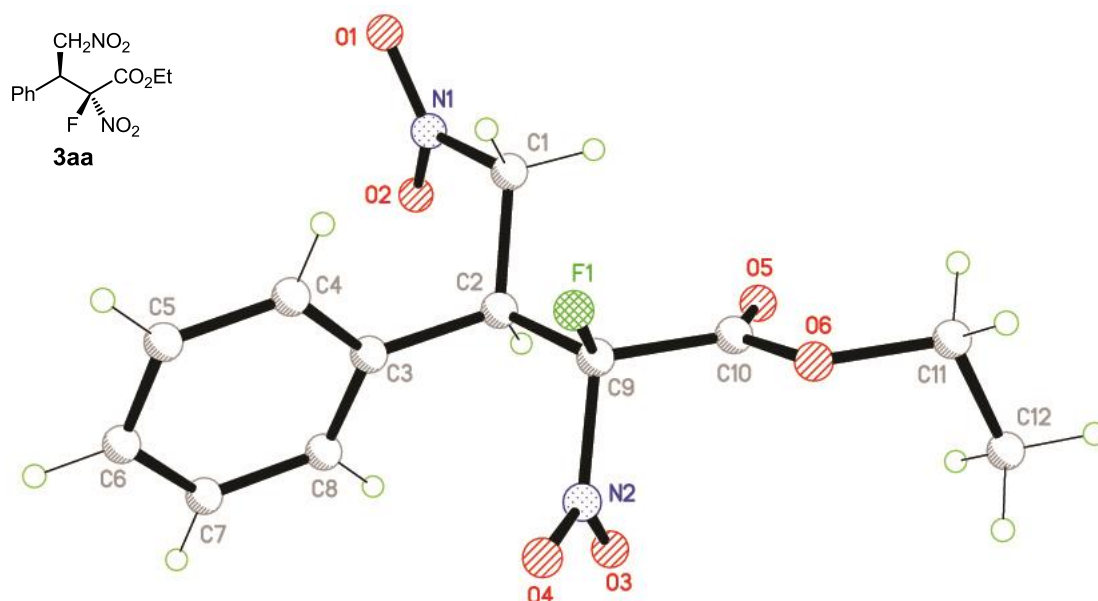

Table 1. Crystal data and structure refinement for D610.

|                                 |                                                                 |          |
|---------------------------------|-----------------------------------------------------------------|----------|
| Identification code             | D610                                                            |          |
| Empirical formula               | C <sub>12</sub> H <sub>13</sub> F N <sub>2</sub> O <sub>6</sub> |          |
| Formula weight                  | 300.24                                                          |          |
| Temperature                     | 100(2) K                                                        |          |
| Wavelength                      | 1.54178 Å                                                       |          |
| Crystal system                  | Orthorhombic                                                    |          |
| Space group                     | P 21 21 21                                                      |          |
| Unit cell dimensions            | a = 5.5351(6) Å                                                 | α = 90°. |
|                                 | b = 11.2034(12) Å                                               | β = 90°. |
|                                 | c = 21.678(2) Å                                                 | γ = 90°. |
| Volume                          | 1344.3(3) Å <sup>3</sup>                                        |          |
| Z                               | 4                                                               |          |
| Density (calculated)            | 1.483 Mg/m <sup>3</sup>                                         |          |
| Absorption coefficient          | 1.117 mm <sup>-1</sup>                                          |          |
| F(000)                          | 624                                                             |          |
| Crystal size                    | 0.280 x 0.150 x 0.130 mm <sup>3</sup>                           |          |
| Theta range for data collection | 4.078 to 72.323°.                                               |          |
| Index ranges                    | -6 ≤ h ≤ 6, -13 ≤ k ≤ 13, -26 ≤ l ≤ 26                          |          |
| Reflections collected           | 22572                                                           |          |
| Independent reflections         | 2637 [R(int) = 0.0240]                                          |          |
| Completeness to theta = 67.679° | 99.9 %                                                          |          |

|                                   |                                             |
|-----------------------------------|---------------------------------------------|
| Absorption correction             | Semi-empirical from equivalents             |
| Max. and min. transmission        | 0.753 and 0.6796                            |
| Refinement method                 | Full-matrix least-squares on F <sup>2</sup> |
| Data / restraints / parameters    | 2637 / 0 / 191                              |
| Goodness-of-fit on F <sup>2</sup> | 1.094                                       |
| Final R indices [I>2sigma(I)]     | R1 = 0.0250, wR2 = 0.0655                   |
| R indices (all data)              | R1 = 0.0253, wR2 = 0.0658                   |
| Absolute structure parameter      | 0.05(2)                                     |
| Extinction coefficient            | n/a                                         |
| Largest diff. peak and hole       | 0.167 and -0.248 e.Å <sup>-3</sup>          |

Table 2. Atomic coordinates ( $\times 10^4$ ) and equivalent isotropic displacement parameters ( $\text{\AA}^2 \times 10^3$ ) for D610.  $U(\text{eq})$  is defined as one third of the trace of the orthogonalized  $U^{ij}$  tensor.

|       | x        | y       | z       | U(eq) |
|-------|----------|---------|---------|-------|
| F(1)  | 10814(2) | 2448(1) | 2094(1) | 26(1) |
| O(1)  | 6458(3)  | -571(1) | 842(1)  | 39(1) |
| O(2)  | 3585(2)  | 486(1)  | 1233(1) | 25(1) |
| O(3)  | 5862(3)  | 3868(1) | 2673(1) | 39(1) |
| O(4)  | 9229(3)  | 4521(1) | 2280(1) | 46(1) |
| O(5)  | 6784(2)  | 1154(1) | 3076(1) | 24(1) |
| O(6)  | 10238(2) | 2174(1) | 3268(1) | 21(1) |
| N(1)  | 5692(3)  | 170(1)  | 1206(1) | 20(1) |
| N(2)  | 7823(3)  | 3743(1) | 2429(1) | 27(1) |
| C(1)  | 7460(3)  | 689(1)  | 1658(1) | 18(1) |
| C(2)  | 6773(3)  | 1978(1) | 1805(1) | 15(1) |
| C(3)  | 6797(3)  | 2784(1) | 1239(1) | 15(1) |
| C(4)  | 8665(3)  | 2734(1) | 807(1)  | 18(1) |
| C(5)  | 8650(3)  | 3487(1) | 297(1)  | 20(1) |
| C(6)  | 6786(3)  | 4299(1) | 216(1)  | 20(1) |
| C(7)  | 4930(3)  | 4356(2) | 644(1)  | 20(1) |
| C(8)  | 4932(3)  | 3604(1) | 1156(1) | 18(1) |
| C(9)  | 8504(3)  | 2445(1) | 2299(1) | 17(1) |
| C(10) | 8370(3)  | 1821(1) | 2935(1) | 17(1) |
| C(11) | 10490(3) | 1630(2) | 3880(1) | 26(1) |
| C(12) | 8971(4)  | 2275(2) | 4347(1) | 32(1) |

Table 3. Bond lengths [Å] and angles [°] for D610.

---

|                  |            |
|------------------|------------|
| F(1)-C(9)        | 1.3534(18) |
| O(1)-N(1)        | 1.2208(19) |
| O(2)-N(1)        | 1.2204(19) |
| O(3)-N(2)        | 1.215(2)   |
| O(4)-N(2)        | 1.212(2)   |
| O(5)-C(10)       | 1.192(2)   |
| O(6)-C(10)       | 1.3210(19) |
| O(6)-C(11)       | 1.4676(18) |
| N(1)-C(1)        | 1.5021(19) |
| N(2)-C(9)        | 1.528(2)   |
| C(1)-C(2)        | 1.527(2)   |
| C(2)-C(3)        | 1.523(2)   |
| C(2)-C(9)        | 1.531(2)   |
| C(3)-C(8)        | 1.394(2)   |
| C(3)-C(4)        | 1.396(2)   |
| C(4)-C(5)        | 1.391(2)   |
| C(5)-C(6)        | 1.387(2)   |
| C(6)-C(7)        | 1.387(2)   |
| C(7)-C(8)        | 1.392(2)   |
| C(9)-C(10)       | 1.547(2)   |
| C(11)-C(12)      | 1.501(3)   |
| <br>             |            |
| C(10)-O(6)-C(11) | 116.32(13) |
| O(2)-N(1)-O(1)   | 124.10(15) |
| O(2)-N(1)-C(1)   | 118.60(13) |
| O(1)-N(1)-C(1)   | 117.27(14) |
| O(4)-N(2)-O(3)   | 127.36(17) |
| O(4)-N(2)-C(9)   | 118.45(16) |
| O(3)-N(2)-C(9)   | 114.18(14) |
| N(1)-C(1)-C(2)   | 109.87(12) |
| C(3)-C(2)-C(1)   | 113.06(12) |
| C(3)-C(2)-C(9)   | 110.85(12) |
| C(1)-C(2)-C(9)   | 108.26(12) |
| C(8)-C(3)-C(4)   | 119.23(14) |
| C(8)-C(3)-C(2)   | 119.29(13) |
| C(4)-C(3)-C(2)   | 121.47(13) |

|                  |            |
|------------------|------------|
| C(5)-C(4)-C(3)   | 120.26(14) |
| C(6)-C(5)-C(4)   | 120.28(14) |
| C(7)-C(6)-C(5)   | 119.70(14) |
| C(6)-C(7)-C(8)   | 120.33(15) |
| C(7)-C(8)-C(3)   | 120.20(14) |
| F(1)-C(9)-N(2)   | 106.92(12) |
| F(1)-C(9)-C(2)   | 111.22(12) |
| N(2)-C(9)-C(2)   | 107.42(12) |
| F(1)-C(9)-C(10)  | 109.84(12) |
| N(2)-C(9)-C(10)  | 104.75(12) |
| C(2)-C(9)-C(10)  | 116.08(12) |
| O(5)-C(10)-O(6)  | 128.67(14) |
| O(5)-C(10)-C(9)  | 123.10(14) |
| O(6)-C(10)-C(9)  | 108.23(12) |
| O(6)-C(11)-C(12) | 110.88(14) |

---

Symmetry transformations used to generate equivalent atoms:

Table 4. Anisotropic displacement parameters ( $\text{\AA}^2 \times 10^3$ ) for D610. The anisotropic displacement factor exponent takes the form:  $-2\pi^2 [ h^2 a^{*2} U^{11} + \dots + 2 h k a^* b^* U^{12} ]$

|      | $U^{11}$ | $U^{22}$ | $U^{33}$ | $U^{23}$ | $U^{13}$ | $U^{12}$ |
|------|----------|----------|----------|----------|----------|----------|
| F(1) | 14(1)    | 45(1)    | 19(1)    | 4(1)     | 1(1)     | -7(1)    |
| O(1) | 48(1)    | 36(1)    | 34(1)    | -20(1)   | -8(1)    | 9(1)     |
| O(2) | 21(1)    | 29(1)    | 24(1)    | 1(1)     | -6(1)    | -3(1)    |
| O(3) | 54(1)    | 34(1)    | 29(1)    | -9(1)    | -2(1)    | 20(1)    |
| O(4) | 71(1)    | 24(1)    | 43(1)    | 12(1)    | -28(1)   | -23(1)   |
| O(5) | 26(1)    | 26(1)    | 19(1)    | 3(1)     | 0(1)     | -8(1)    |
| O(6) | 22(1)    | 26(1)    | 16(1)    | 4(1)     | -4(1)    | -3(1)    |
| N(1) | 26(1)    | 16(1)    | 17(1)    | 1(1)     | -2(1)    | -2(1)    |
| N(2) | 43(1)    | 18(1)    | 19(1)    | 0(1)     | -12(1)   | -2(1)    |
| C(1) | 18(1)    | 18(1)    | 18(1)    | 0(1)     | -2(1)    | 0(1)     |
| C(2) | 14(1)    | 17(1)    | 14(1)    | 0(1)     | 1(1)     | 0(1)     |
| C(3) | 16(1)    | 15(1)    | 14(1)    | -2(1)    | -1(1)    | -3(1)    |
| C(4) | 16(1)    | 20(1)    | 17(1)    | -2(1)    | 0(1)     | 1(1)     |
| C(5) | 21(1)    | 24(1)    | 14(1)    | -2(1)    | 3(1)     | -2(1)    |
| C(6) | 26(1)    | 18(1)    | 15(1)    | 1(1)     | -1(1)    | -3(1)    |

|       |       |       |       |       |       |       |
|-------|-------|-------|-------|-------|-------|-------|
| C(7)  | 22(1) | 17(1) | 21(1) | 1(1)  | -2(1) | 3(1)  |
| C(8)  | 16(1) | 19(1) | 18(1) | -1(1) | 3(1)  | 0(1)  |
| C(9)  | 15(1) | 18(1) | 17(1) | 1(1)  | 0(1)  | -2(1) |
| C(10) | 19(1) | 17(1) | 15(1) | 1(1)  | 0(1)  | 2(1)  |
| C(11) | 29(1) | 31(1) | 17(1) | 7(1)  | -7(1) | -2(1) |
| C(12) | 49(1) | 30(1) | 18(1) | -2(1) | -1(1) | -9(1) |

Table 5. Hydrogen coordinates ( $\times 10^4$ ) and isotropic displacement parameters ( $\text{\AA}^2 \times 10^{-3}$ ) for D610.

|        | x     | y    | z    | U(eq) |
|--------|-------|------|------|-------|
| H(1A)  | 9108  | 663  | 1482 | 21    |
| H(1B)  | 7454  | 210  | 2042 | 21    |
| H(2)   | 5102  | 1981 | 1980 | 18    |
| H(4)   | 9952  | 2183 | 862  | 21    |
| H(5)   | 9922  | 3446 | 4    | 24    |
| H(6)   | 6781  | 4814 | -133 | 24    |
| H(7)   | 3651  | 4911 | 589  | 24    |
| H(8)   | 3659  | 3650 | 1448 | 21    |
| H(11A) | 12205 | 1656 | 4009 | 31    |
| H(11B) | 9988  | 783  | 3861 | 31    |
| H(12A) | 9491  | 3110 | 4372 | 49    |
| H(12B) | 9159  | 1895 | 4751 | 49    |
| H(12C) | 7271  | 2243 | 4221 | 49    |



## D. NMR Spectra of the Michael Products

### Major diastereomer (3a)

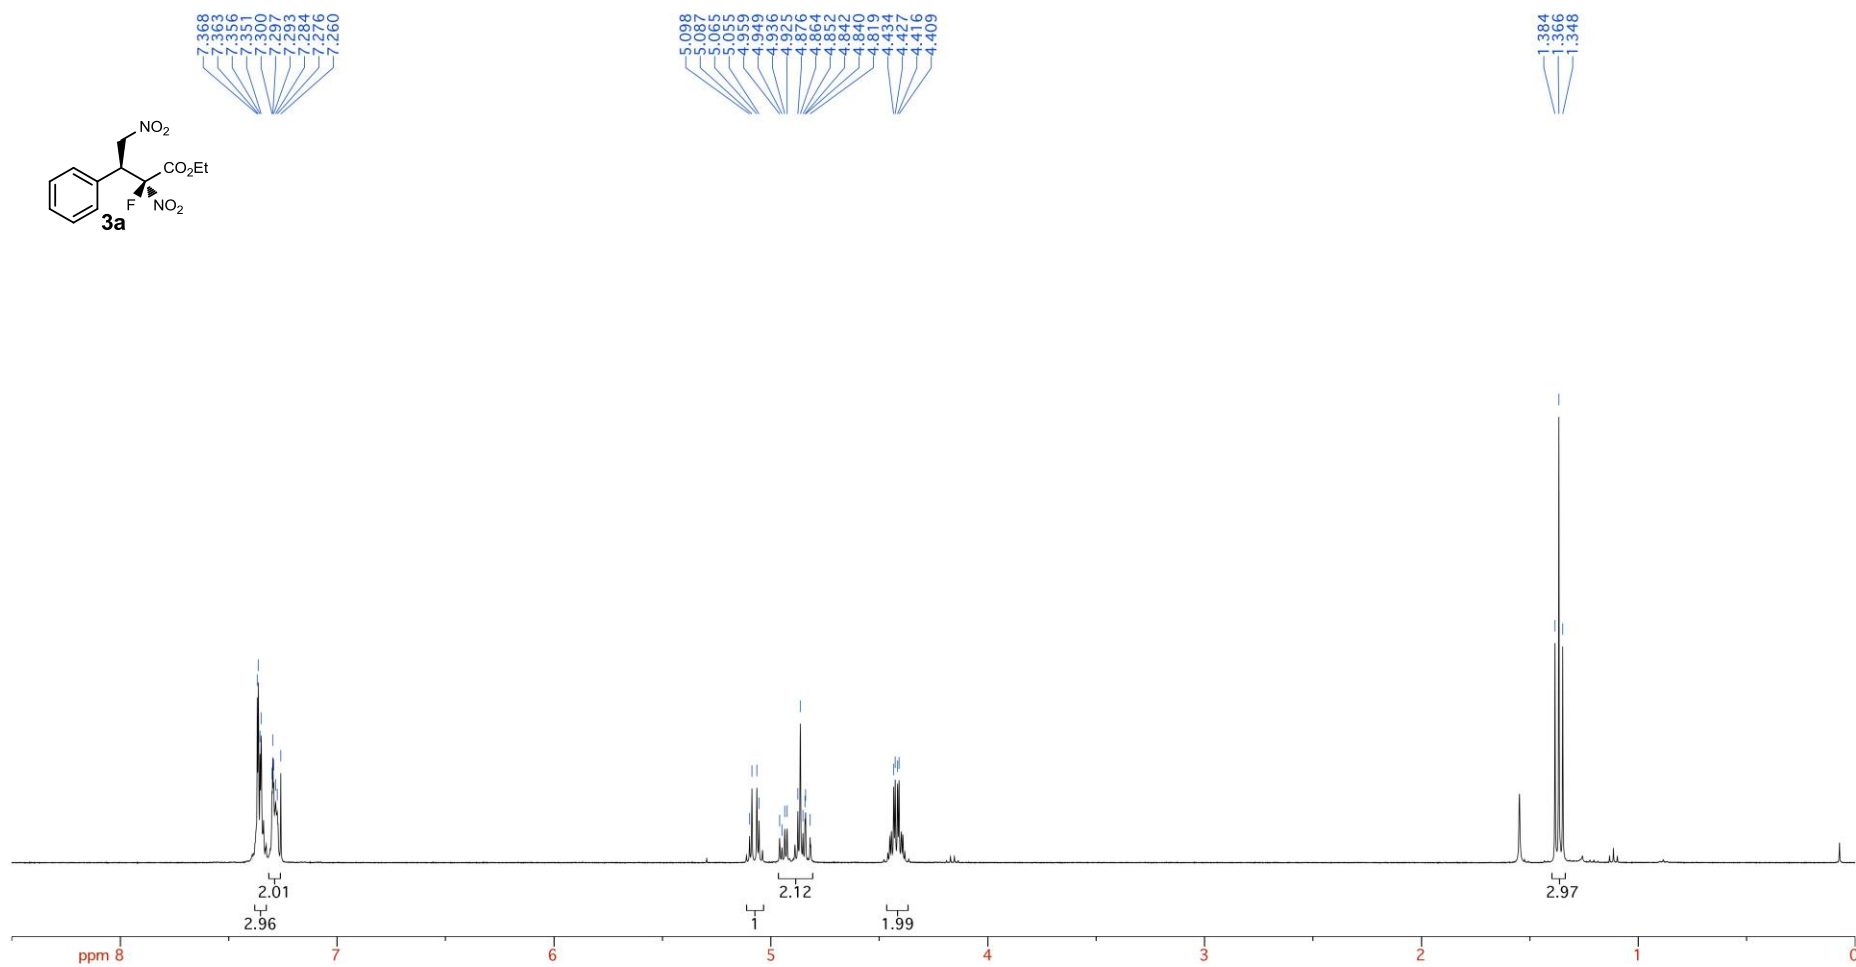

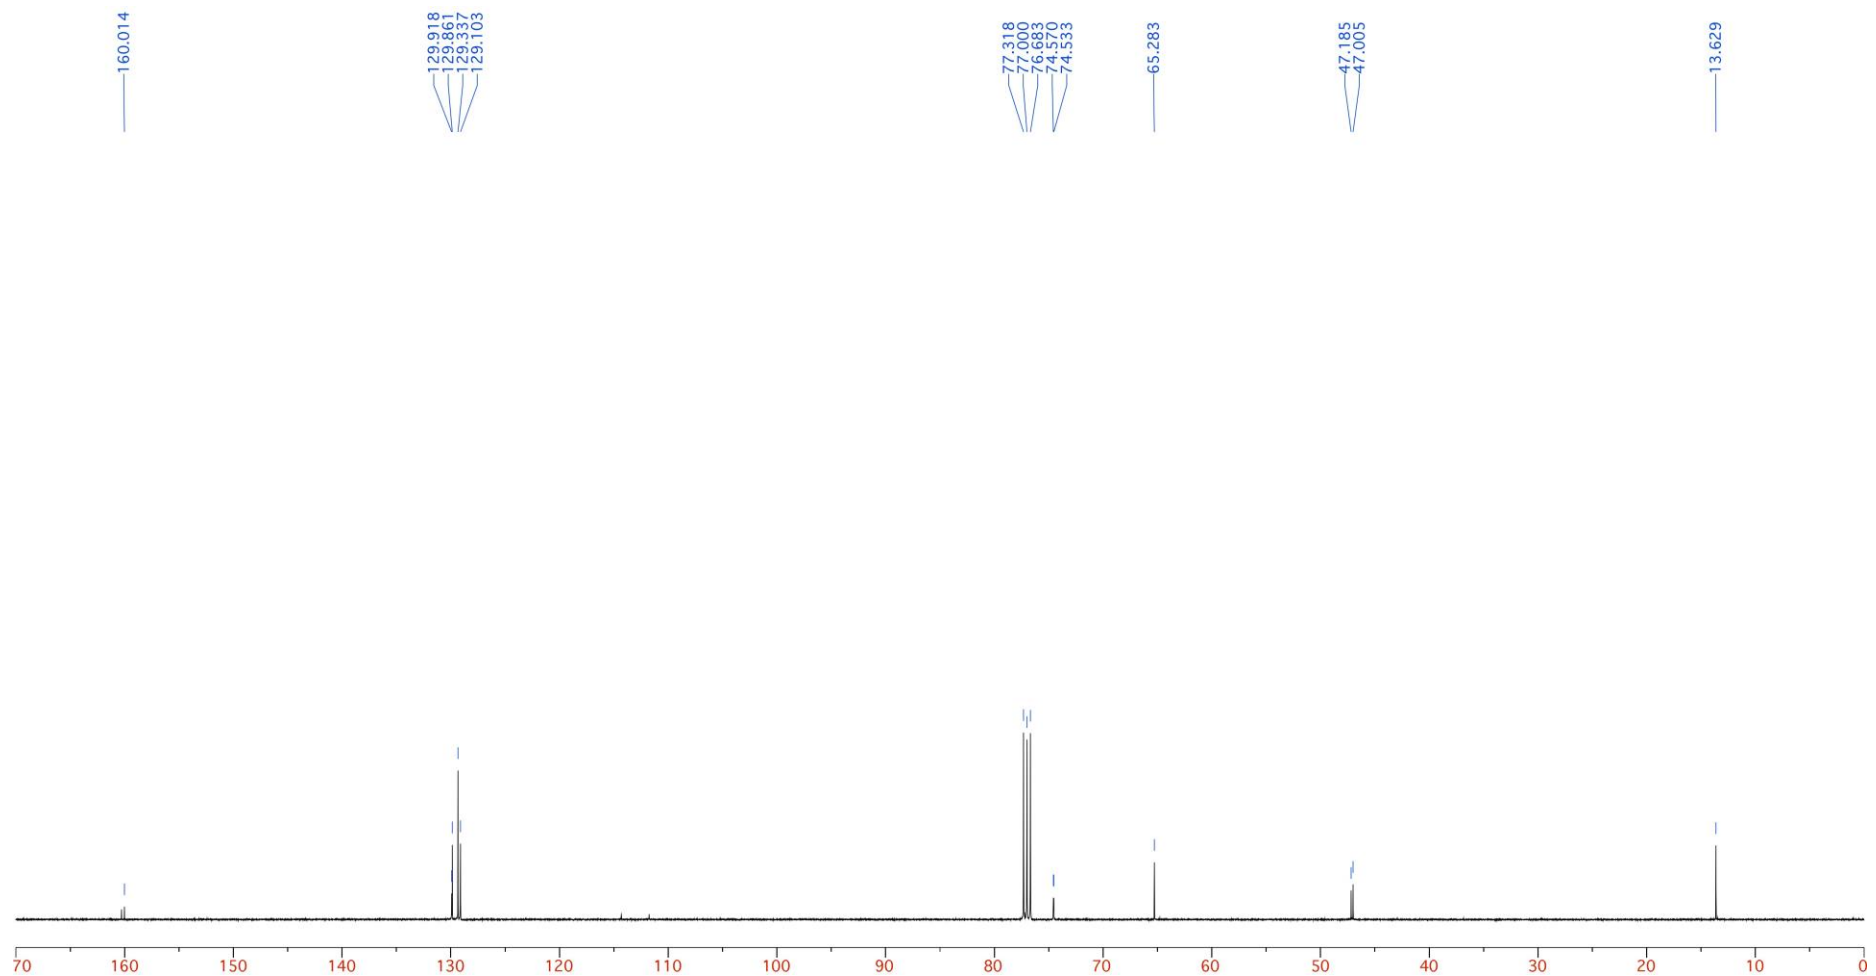

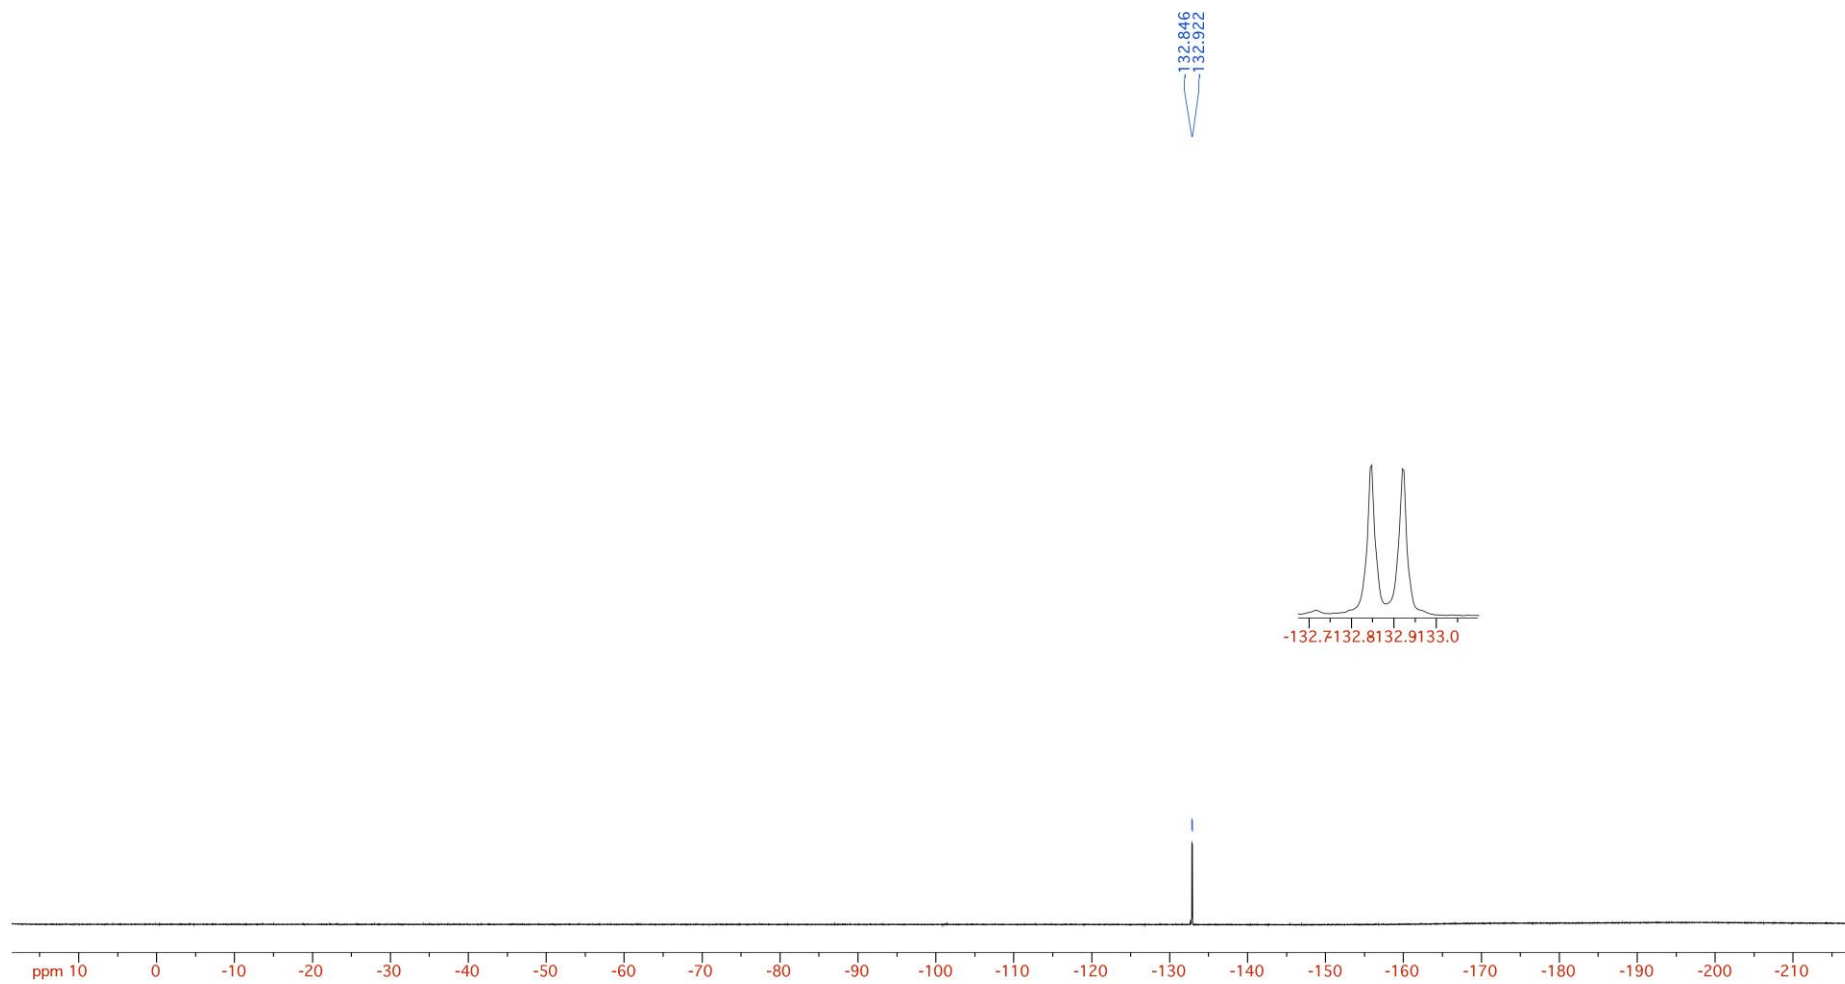

Major diastereomer (3b)

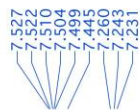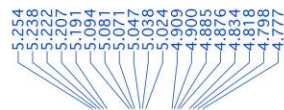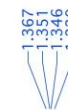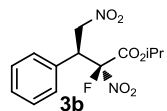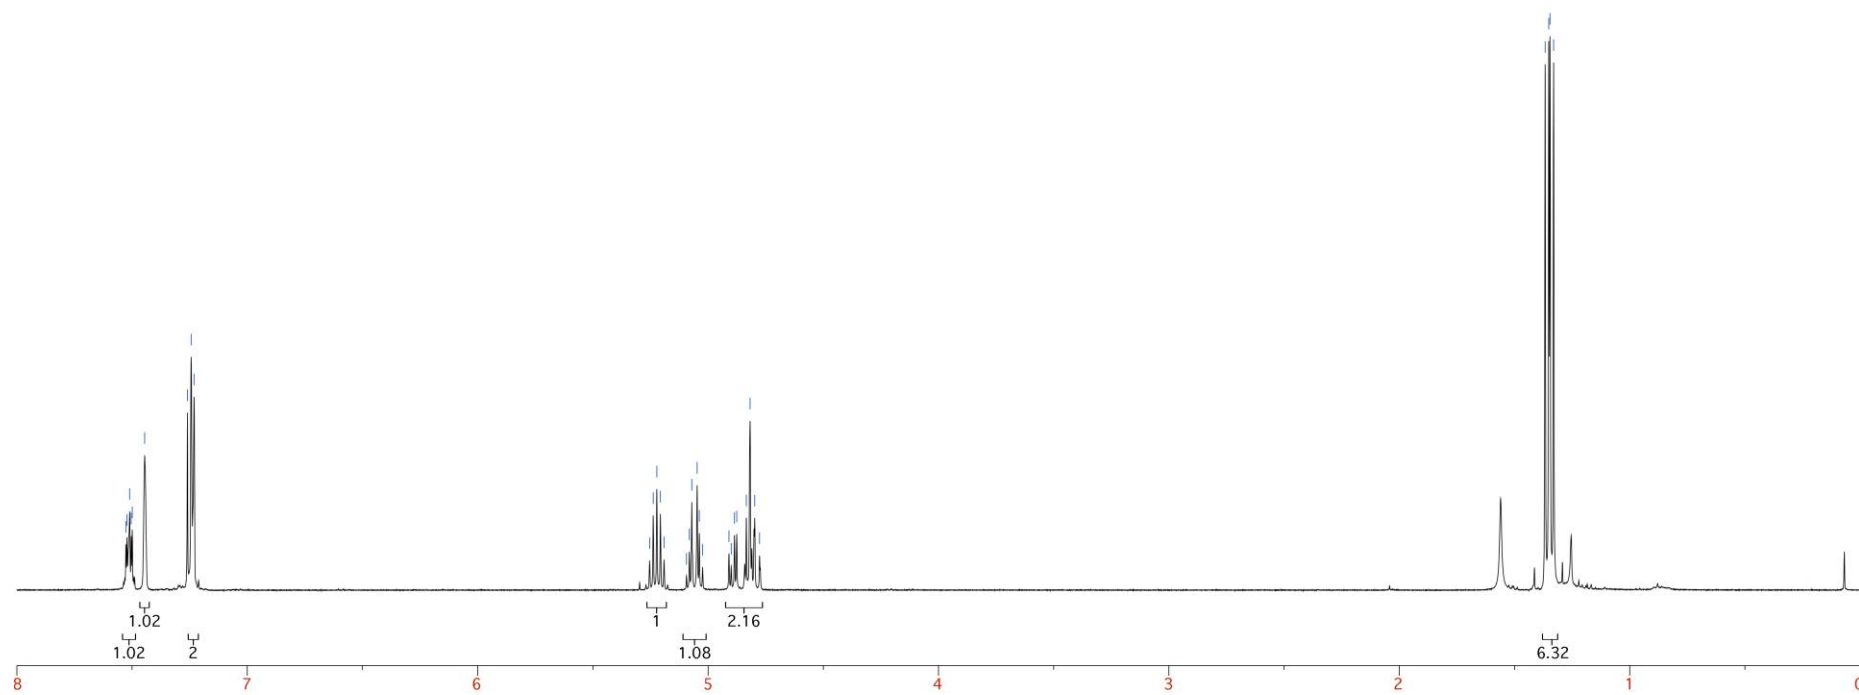

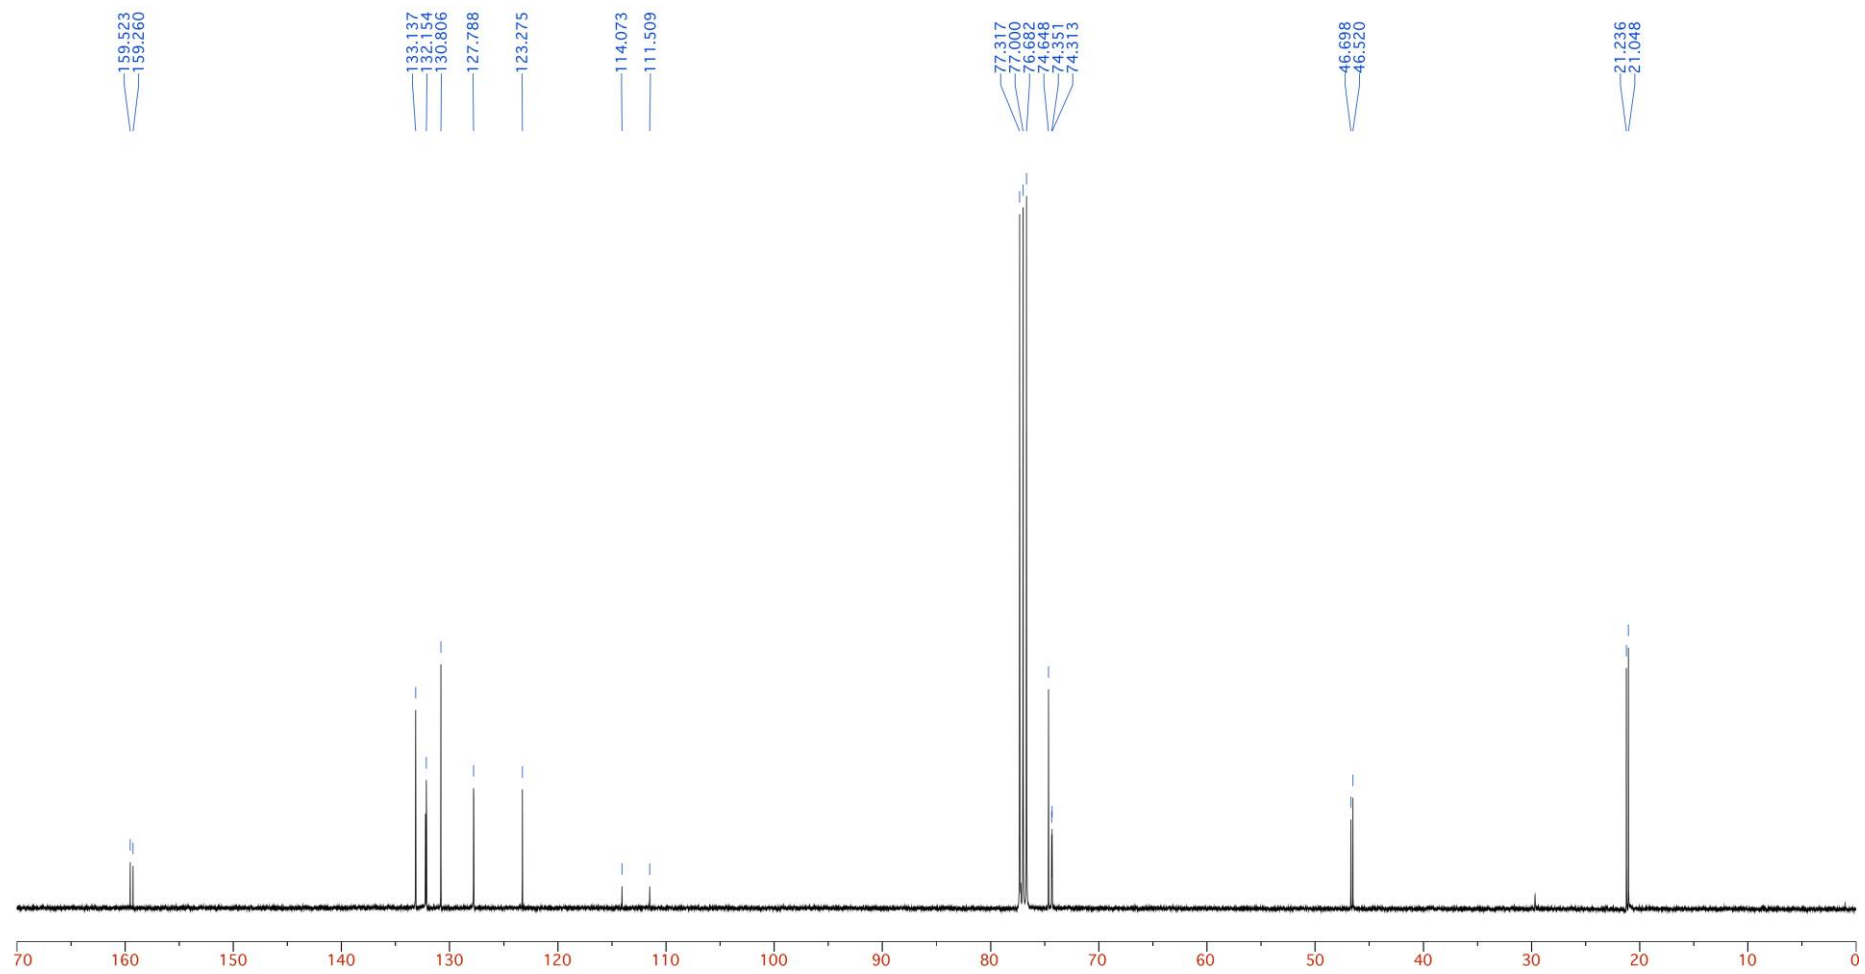

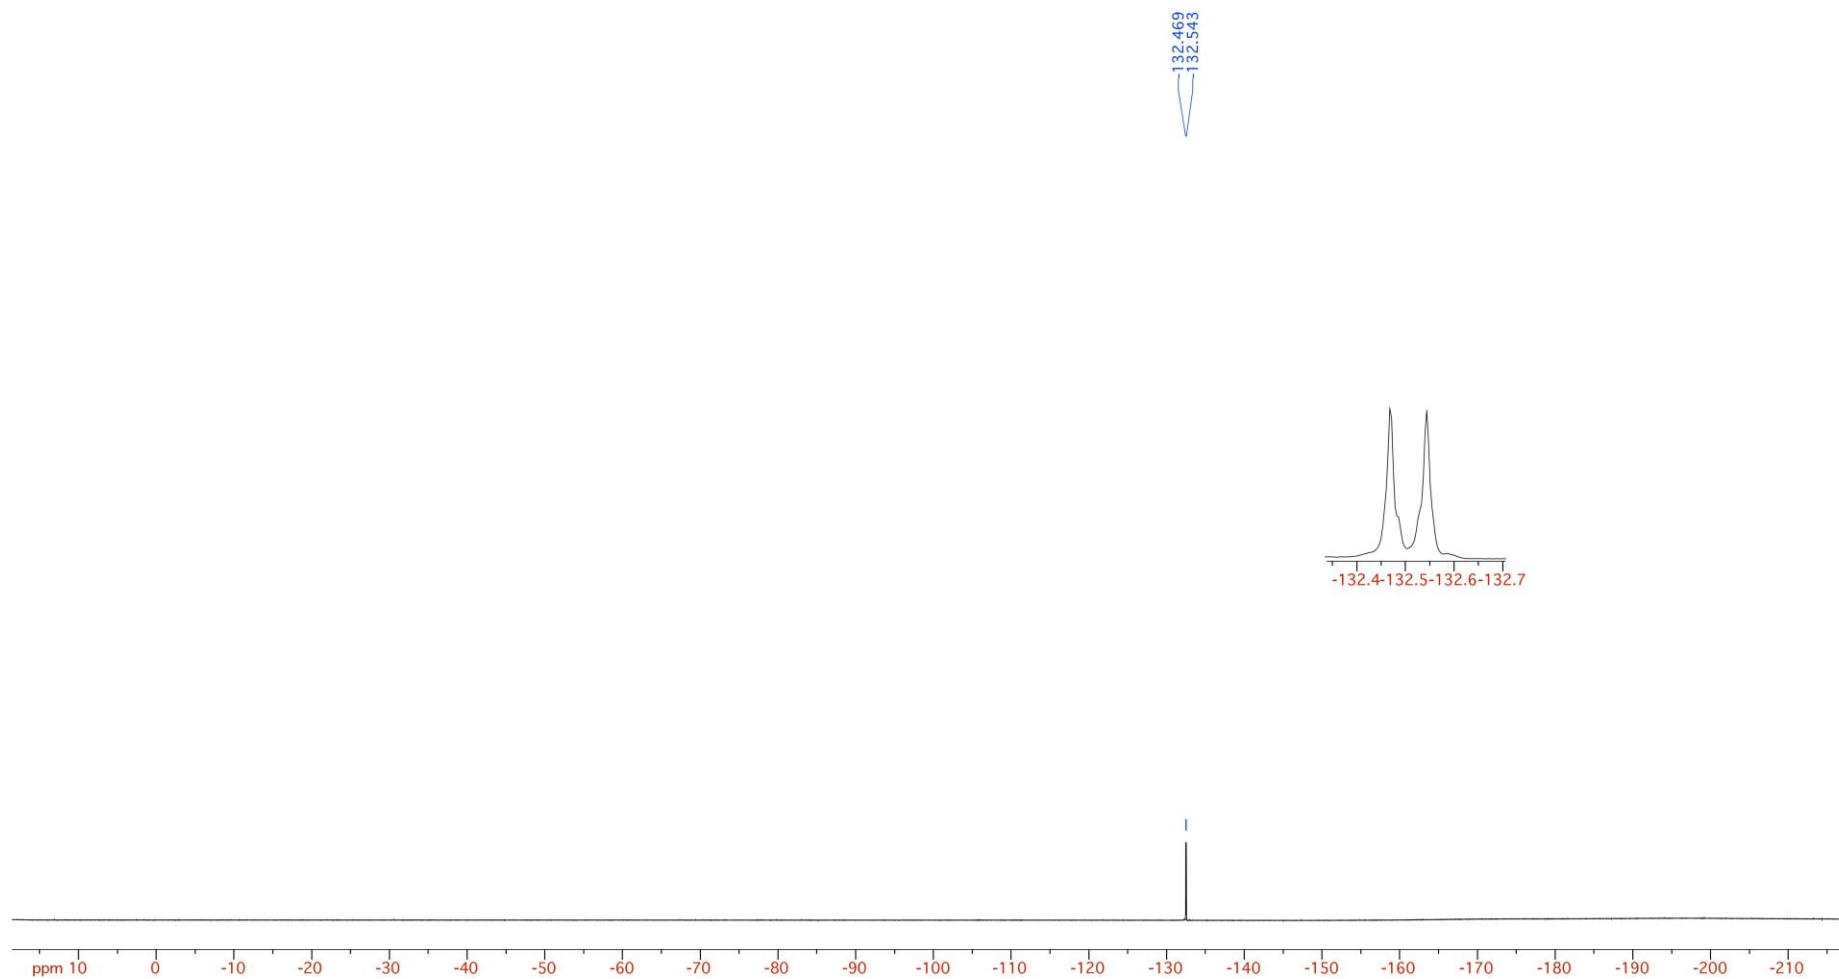

Major diastereomer (3c)

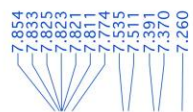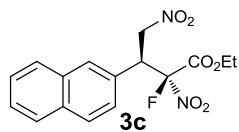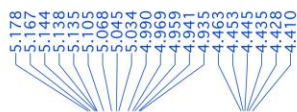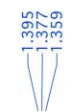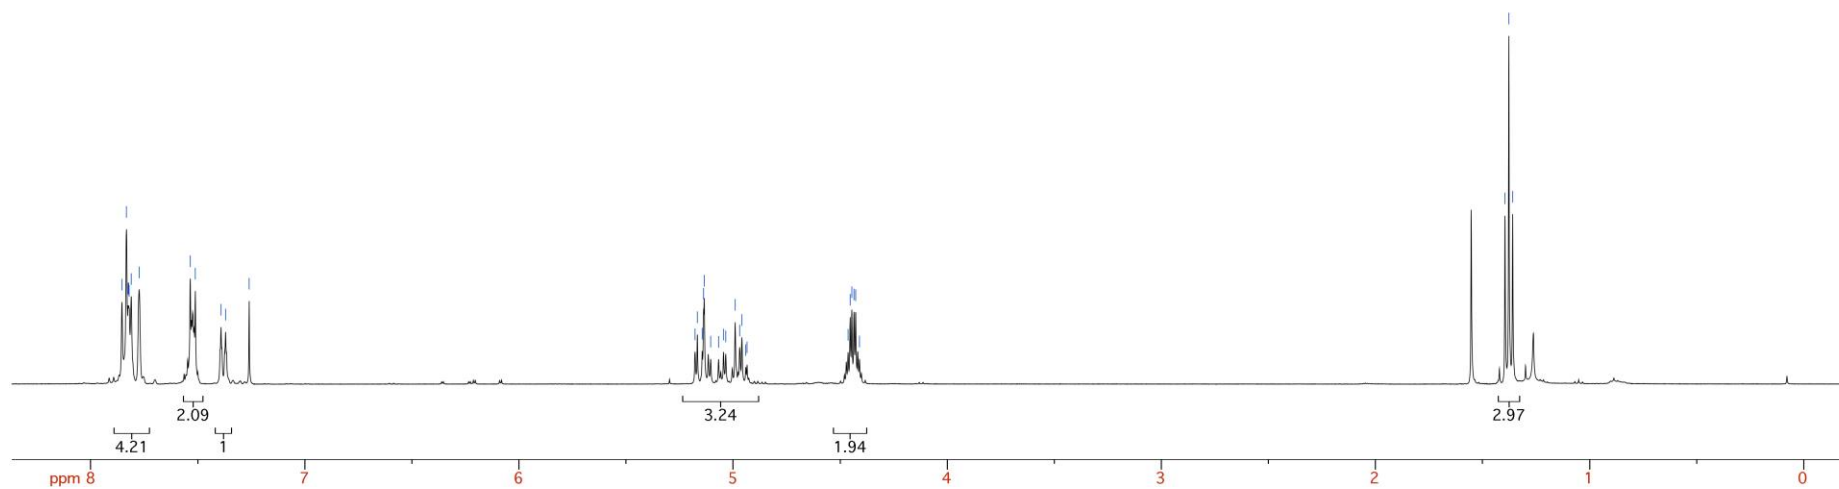

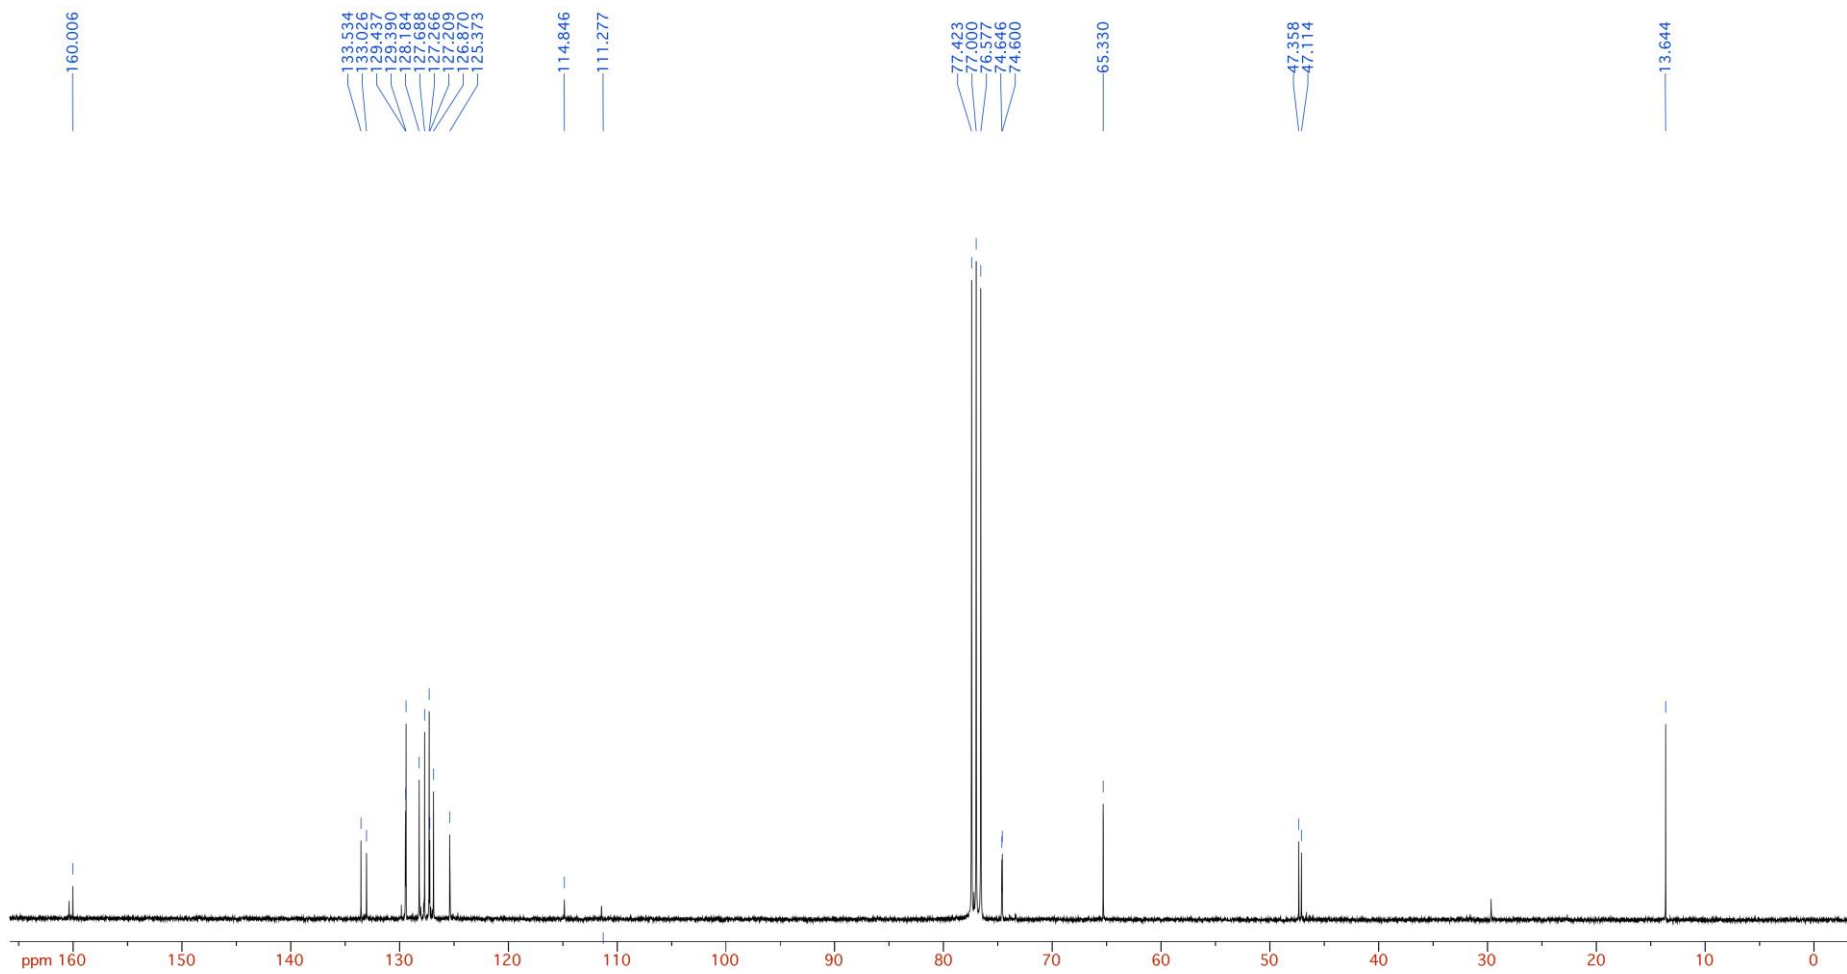



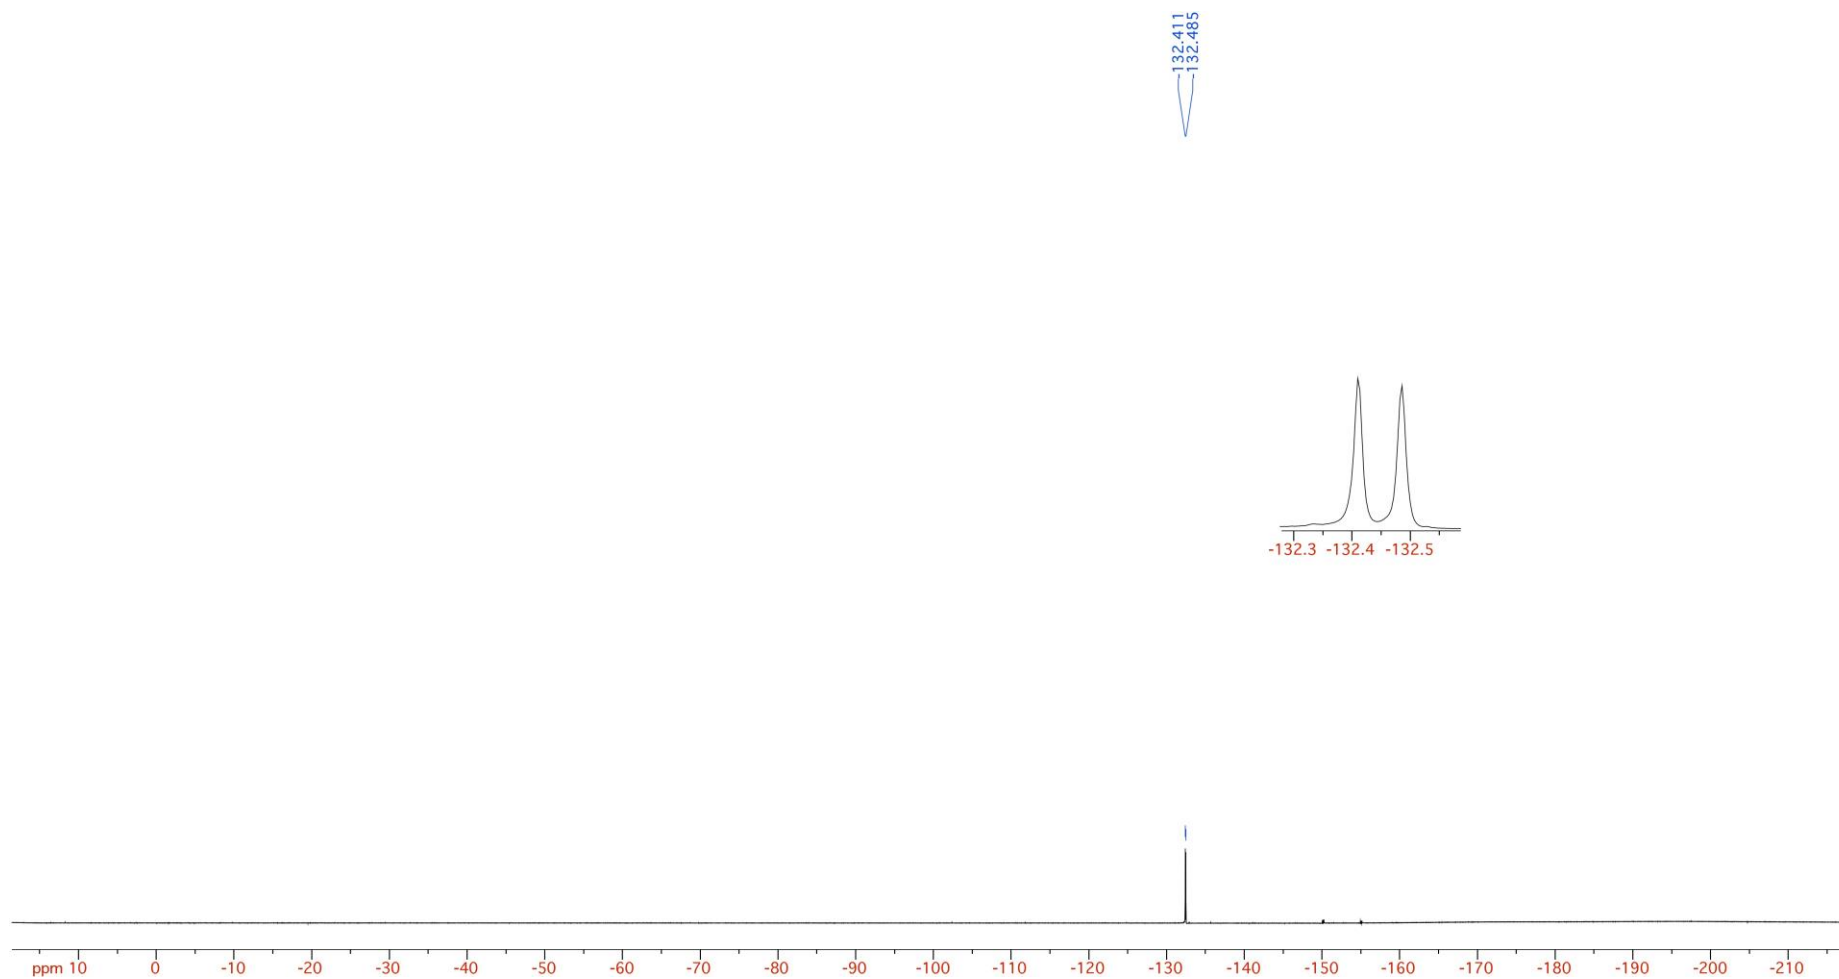

Major diastereomer (3d)

7.644  
7.624  
7.458  
7.437  
7.260

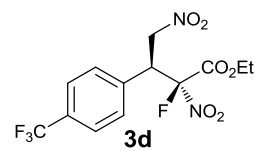

5.196  
5.176  
5.156  
5.136  
5.116  
5.096  
5.076  
5.056  
5.036  
4.970  
4.950  
4.930  
4.910  
4.890  
4.870  
4.850  
4.830  
4.810  
4.790  
4.770  
4.750  
4.730  
4.710  
4.690  
4.670  
4.650  
4.630  
4.610  
4.590  
4.570  
4.550  
4.530  
4.510  
4.490  
4.470  
4.450  
4.430  
4.410  
4.390  
4.370  
4.350  
4.330  
4.310  
4.290  
4.270  
4.250  
4.230  
4.210  
4.190  
4.170  
4.150  
4.130  
4.110  
4.090  
4.070  
4.050  
4.030  
4.010  
3.990  
3.970  
3.950  
3.930  
3.910  
3.890  
3.870  
3.850  
3.830  
3.810  
3.790  
3.770  
3.750  
3.730  
3.710  
3.690  
3.670  
3.650  
3.630  
3.610  
3.590  
3.570  
3.550  
3.530  
3.510  
3.490  
3.470  
3.450  
3.430  
3.410  
3.390  
3.370  
3.350  
3.330  
3.310  
3.290  
3.270  
3.250  
3.230  
3.210  
3.190  
3.170  
3.150  
3.130  
3.110  
3.090  
3.070  
3.050  
3.030  
3.010  
2.990  
2.970  
2.950  
2.930  
2.910  
2.890  
2.870  
2.850  
2.830  
2.810  
2.790  
2.770  
2.750  
2.730  
2.710  
2.690  
2.670  
2.650  
2.630  
2.610  
2.590  
2.570  
2.550  
2.530  
2.510  
2.490  
2.470  
2.450  
2.430  
2.410  
2.390  
2.370  
2.350  
2.330  
2.310  
2.290  
2.270  
2.250  
2.230  
2.210  
2.190  
2.170  
2.150  
2.130  
2.110  
2.090  
2.070  
2.050  
2.030  
2.010  
1.990  
1.970  
1.950  
1.930  
1.910  
1.890  
1.870  
1.850  
1.830  
1.810  
1.790  
1.770  
1.750  
1.730  
1.710  
1.690  
1.670  
1.650  
1.630  
1.610  
1.590  
1.570  
1.550  
1.530  
1.510  
1.490  
1.470  
1.450  
1.430  
1.410  
1.390  
1.370  
1.350  
1.330  
1.310  
1.290  
1.270  
1.250  
1.230  
1.210  
1.190  
1.170  
1.150  
1.130  
1.110  
1.090  
1.070  
1.050  
1.030  
1.010  
0.990  
0.970  
0.950  
0.930  
0.910  
0.890  
0.870  
0.850  
0.830  
0.810  
0.790  
0.770  
0.750  
0.730  
0.710  
0.690  
0.670  
0.650  
0.630  
0.610  
0.590  
0.570  
0.550  
0.530  
0.510  
0.490  
0.470  
0.450  
0.430  
0.410  
0.390  
0.370  
0.350  
0.330  
0.310  
0.290  
0.270  
0.250  
0.230  
0.210  
0.190  
0.170  
0.150  
0.130  
0.110  
0.090  
0.070  
0.050  
0.030  
0.010

1.390  
1.372  
1.354

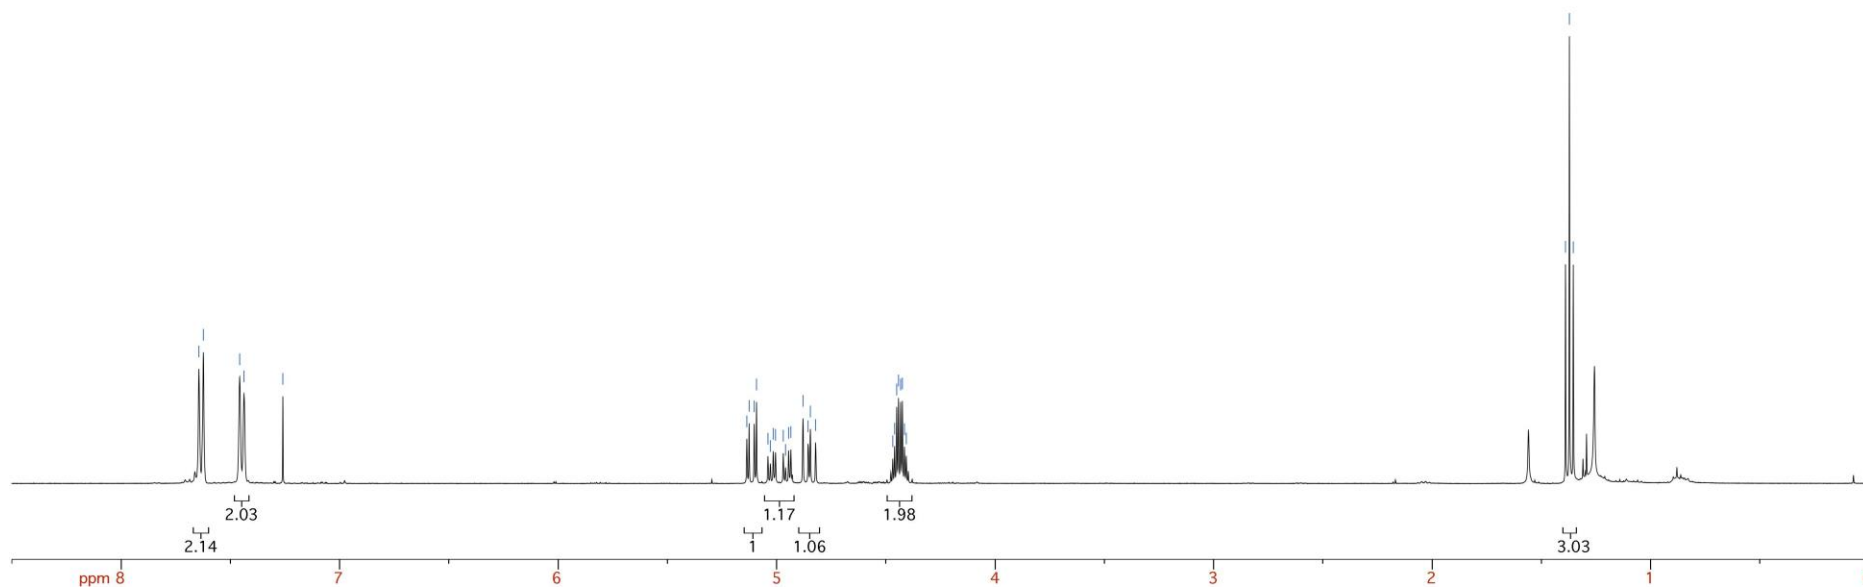

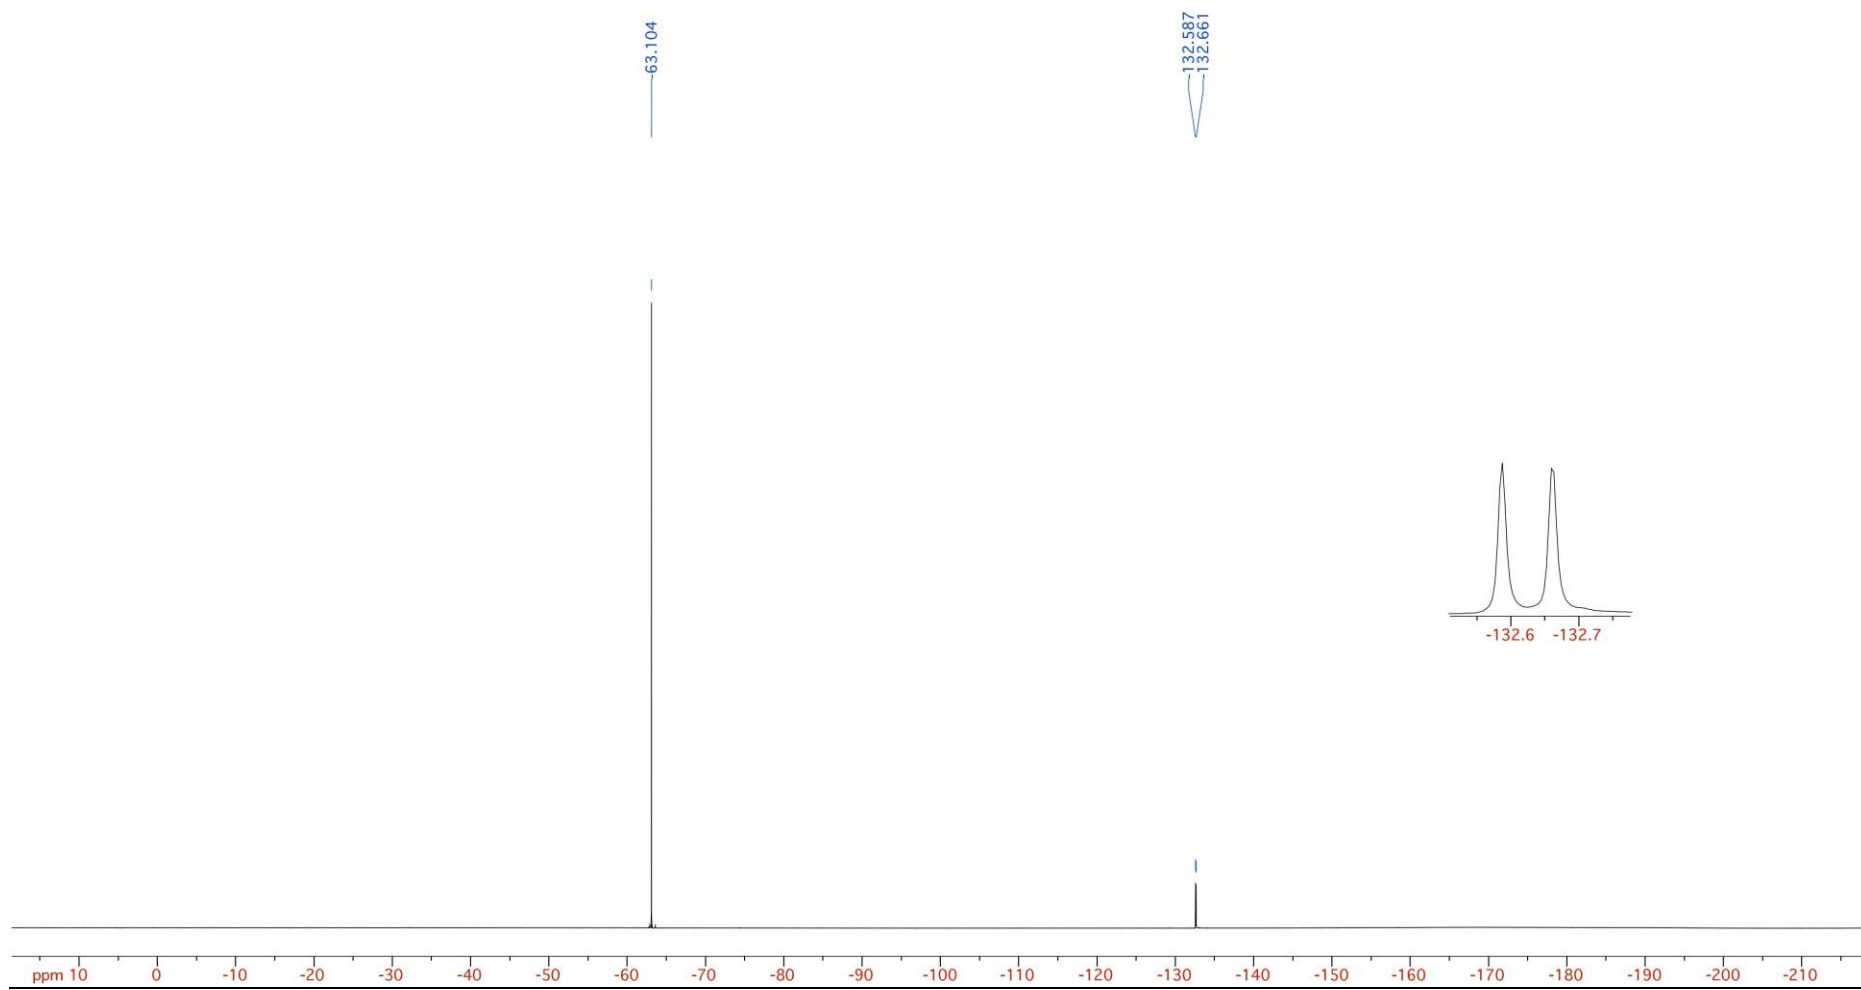

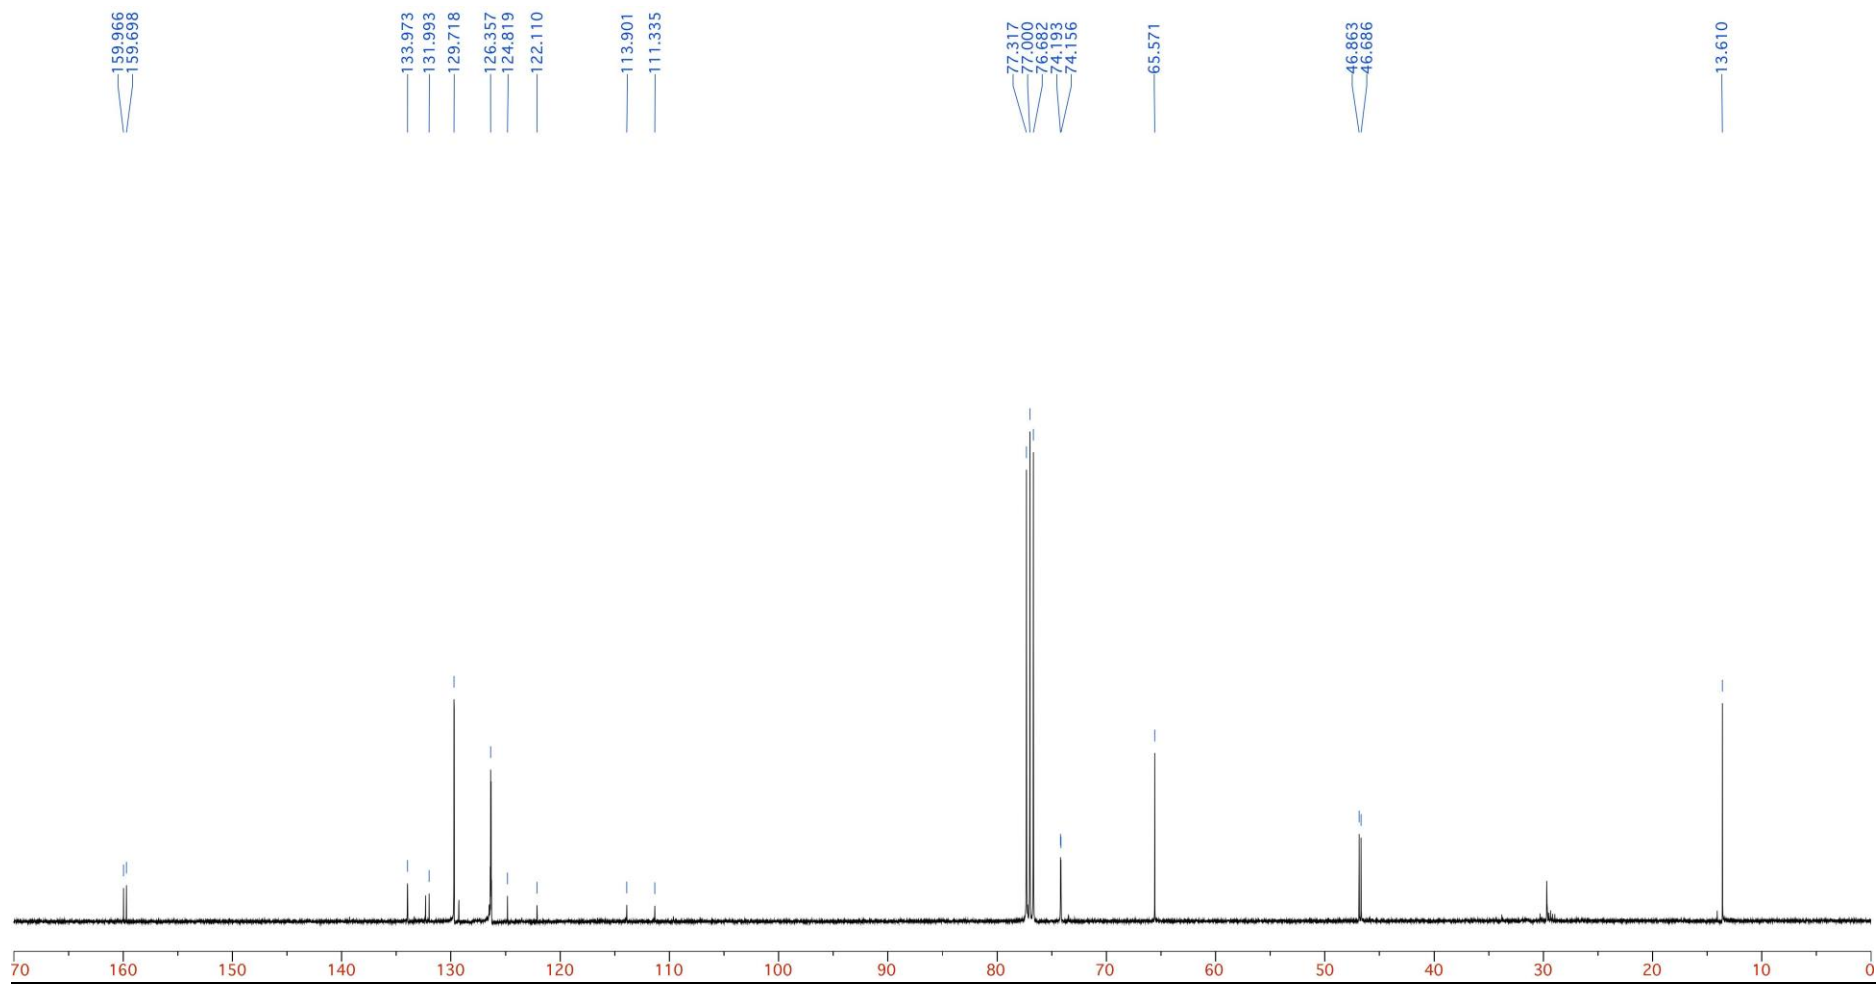

Major diastereomer (3e)

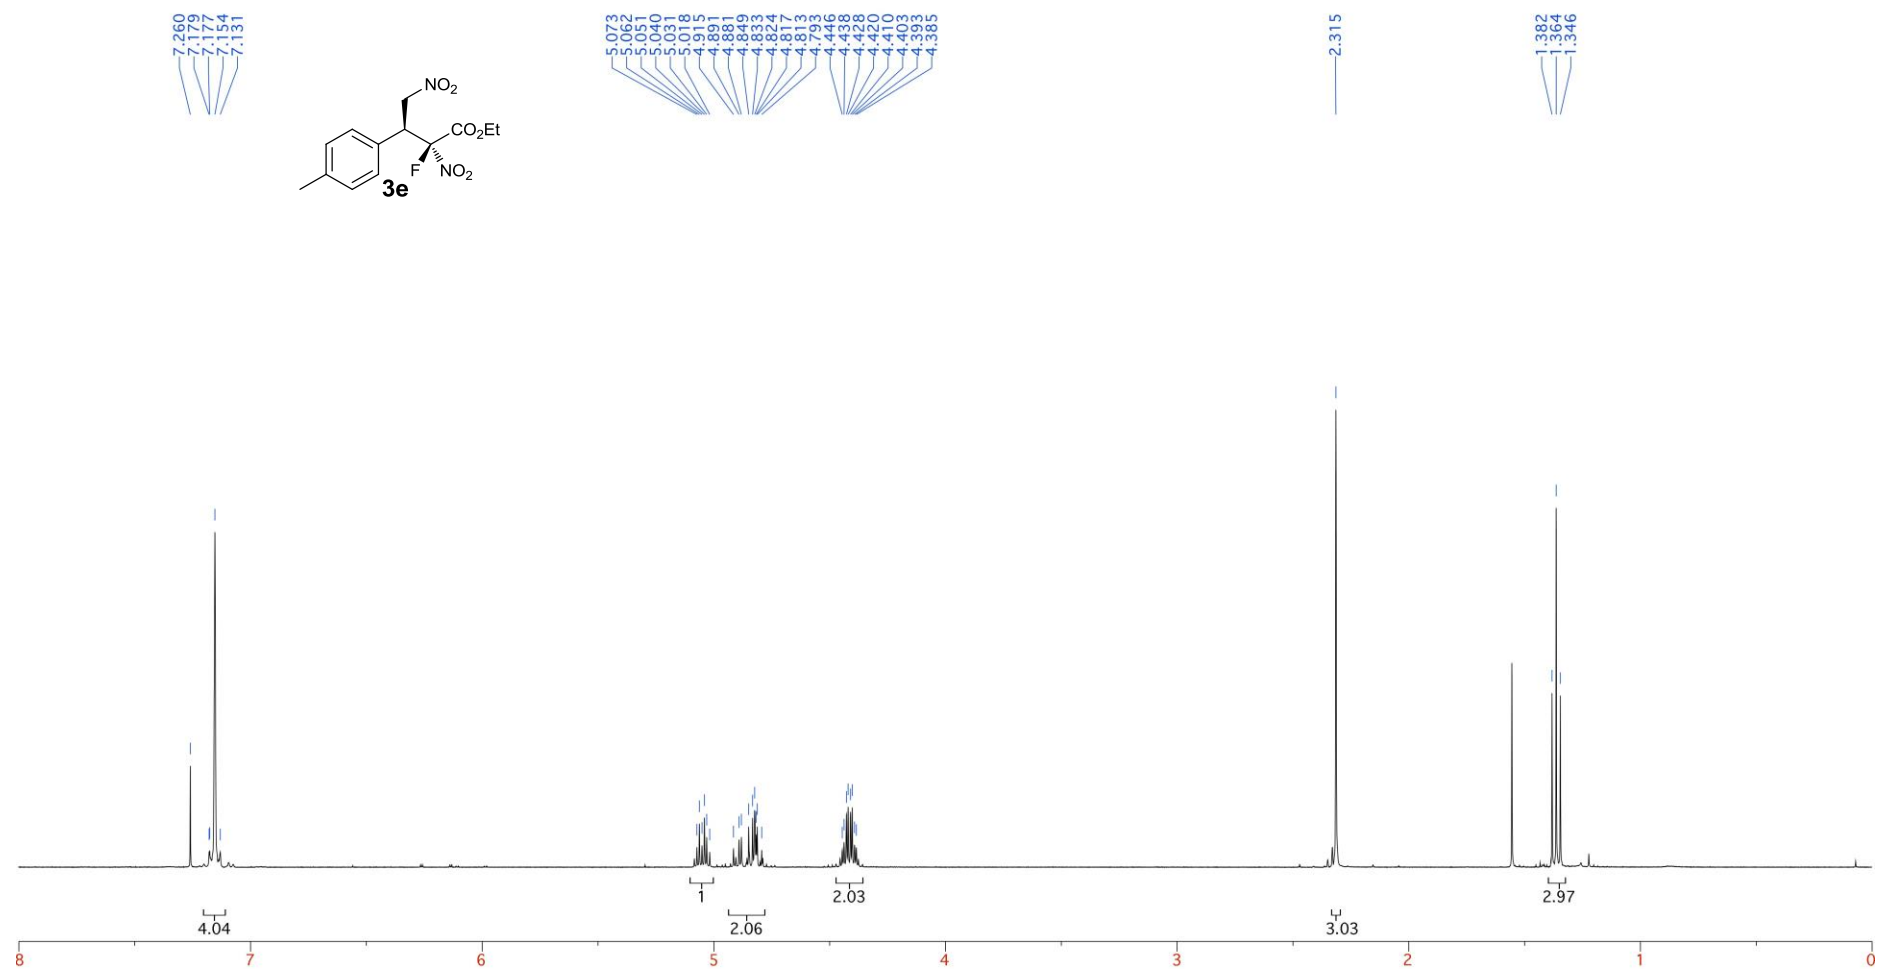

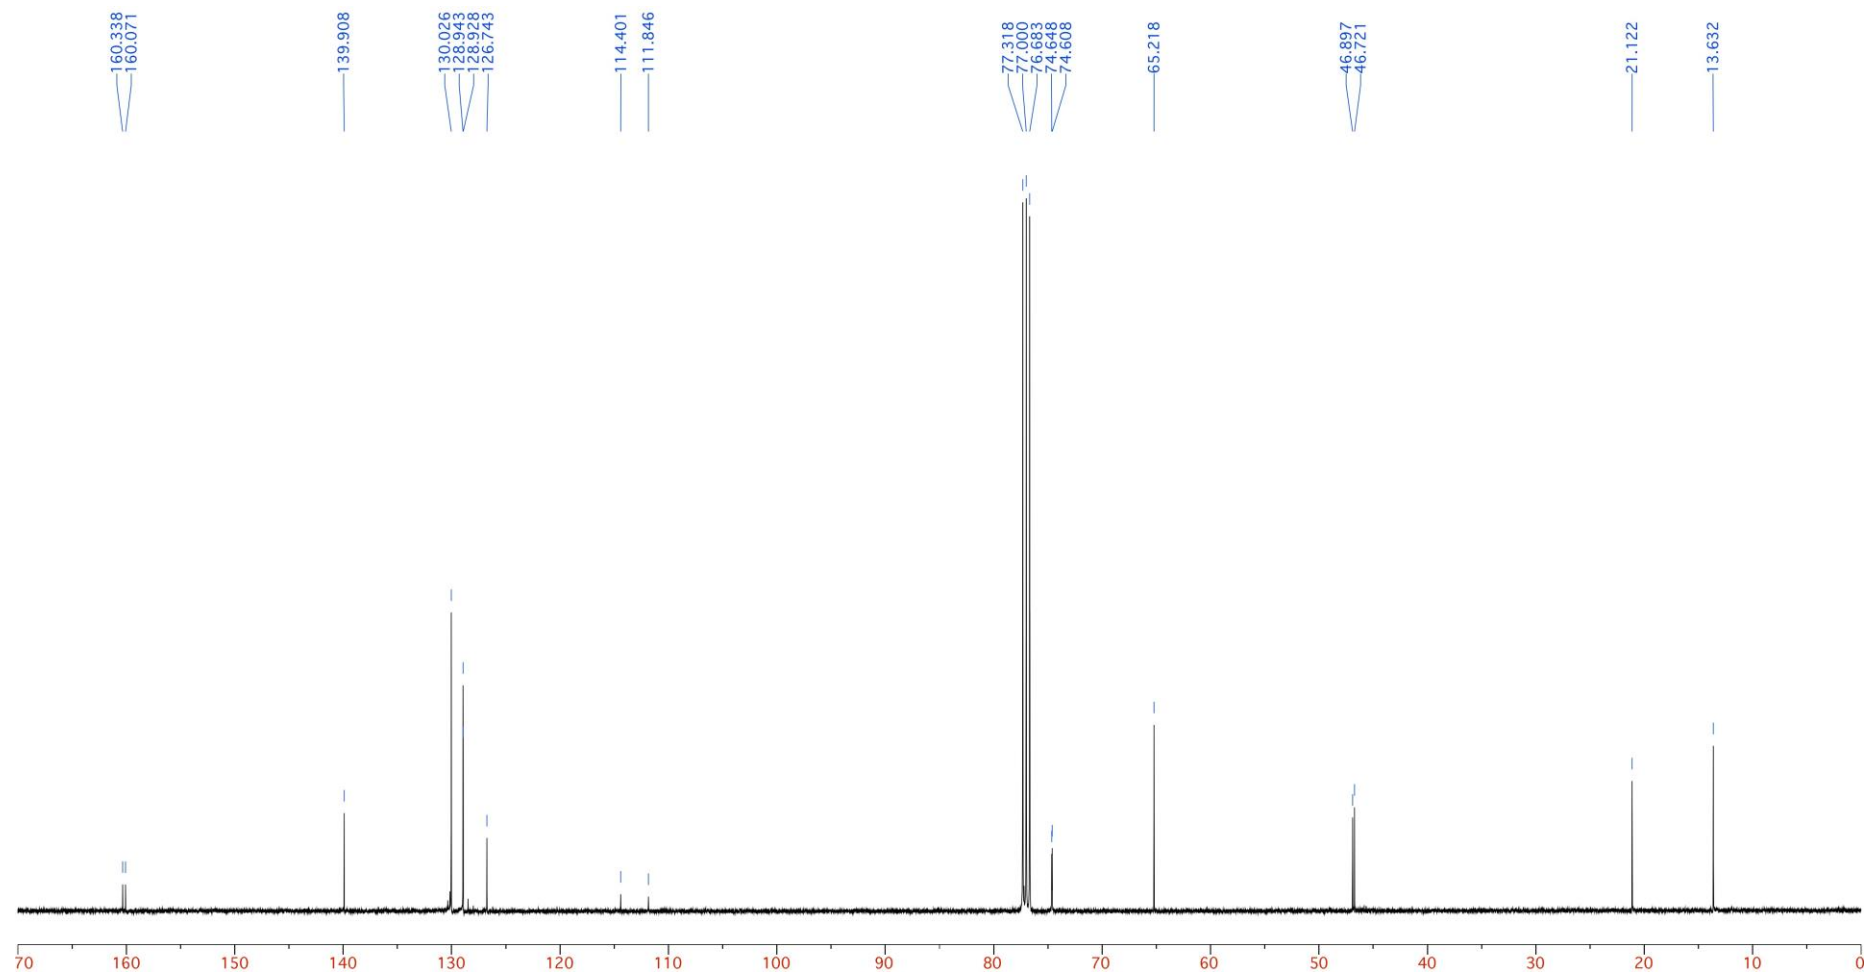

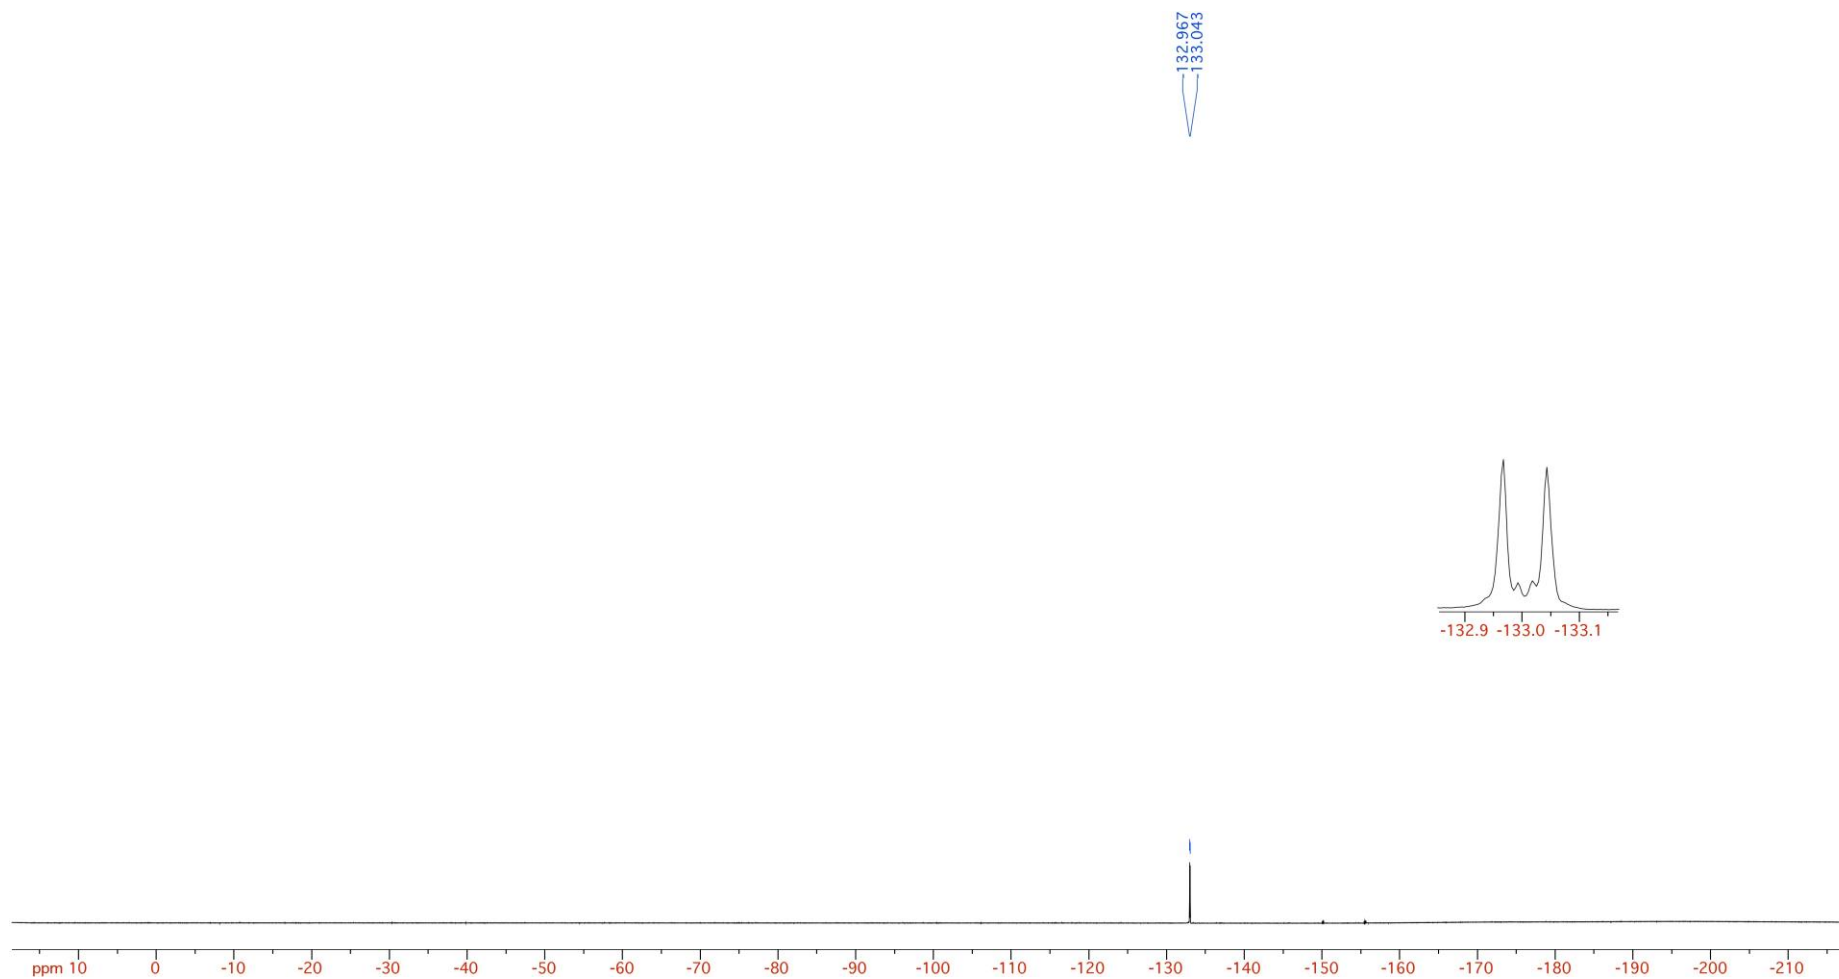

Major diastereomer (3f)

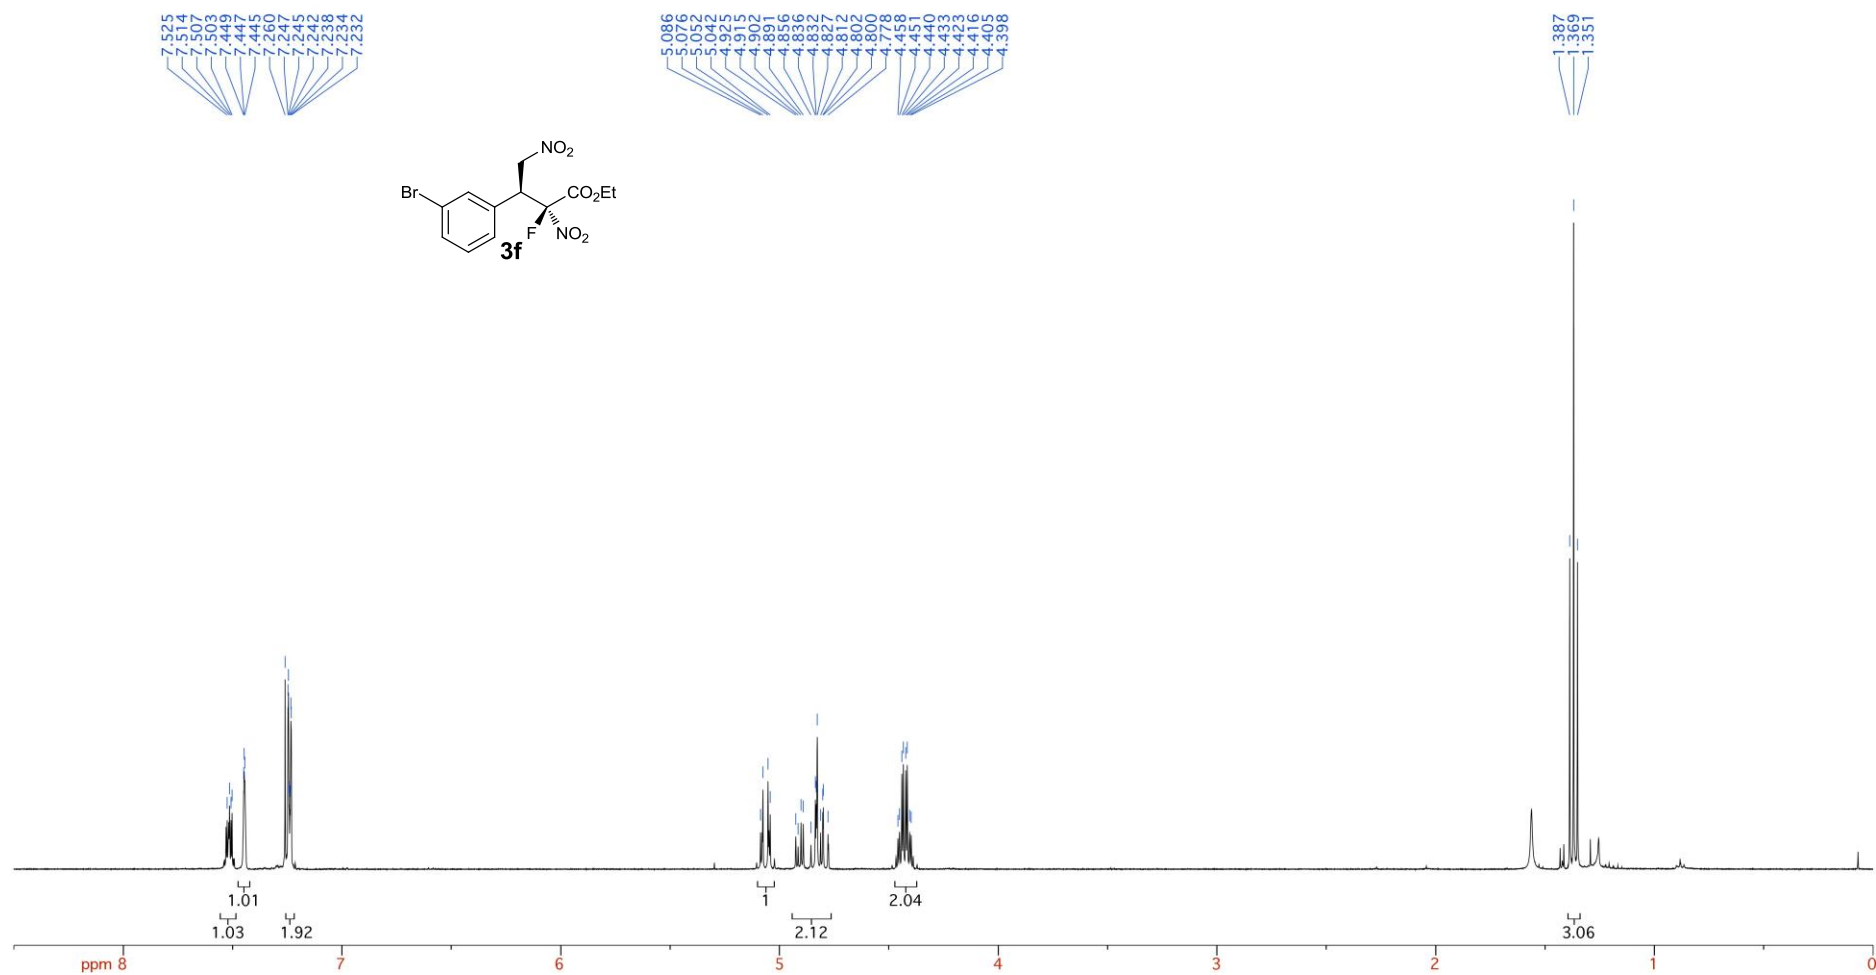



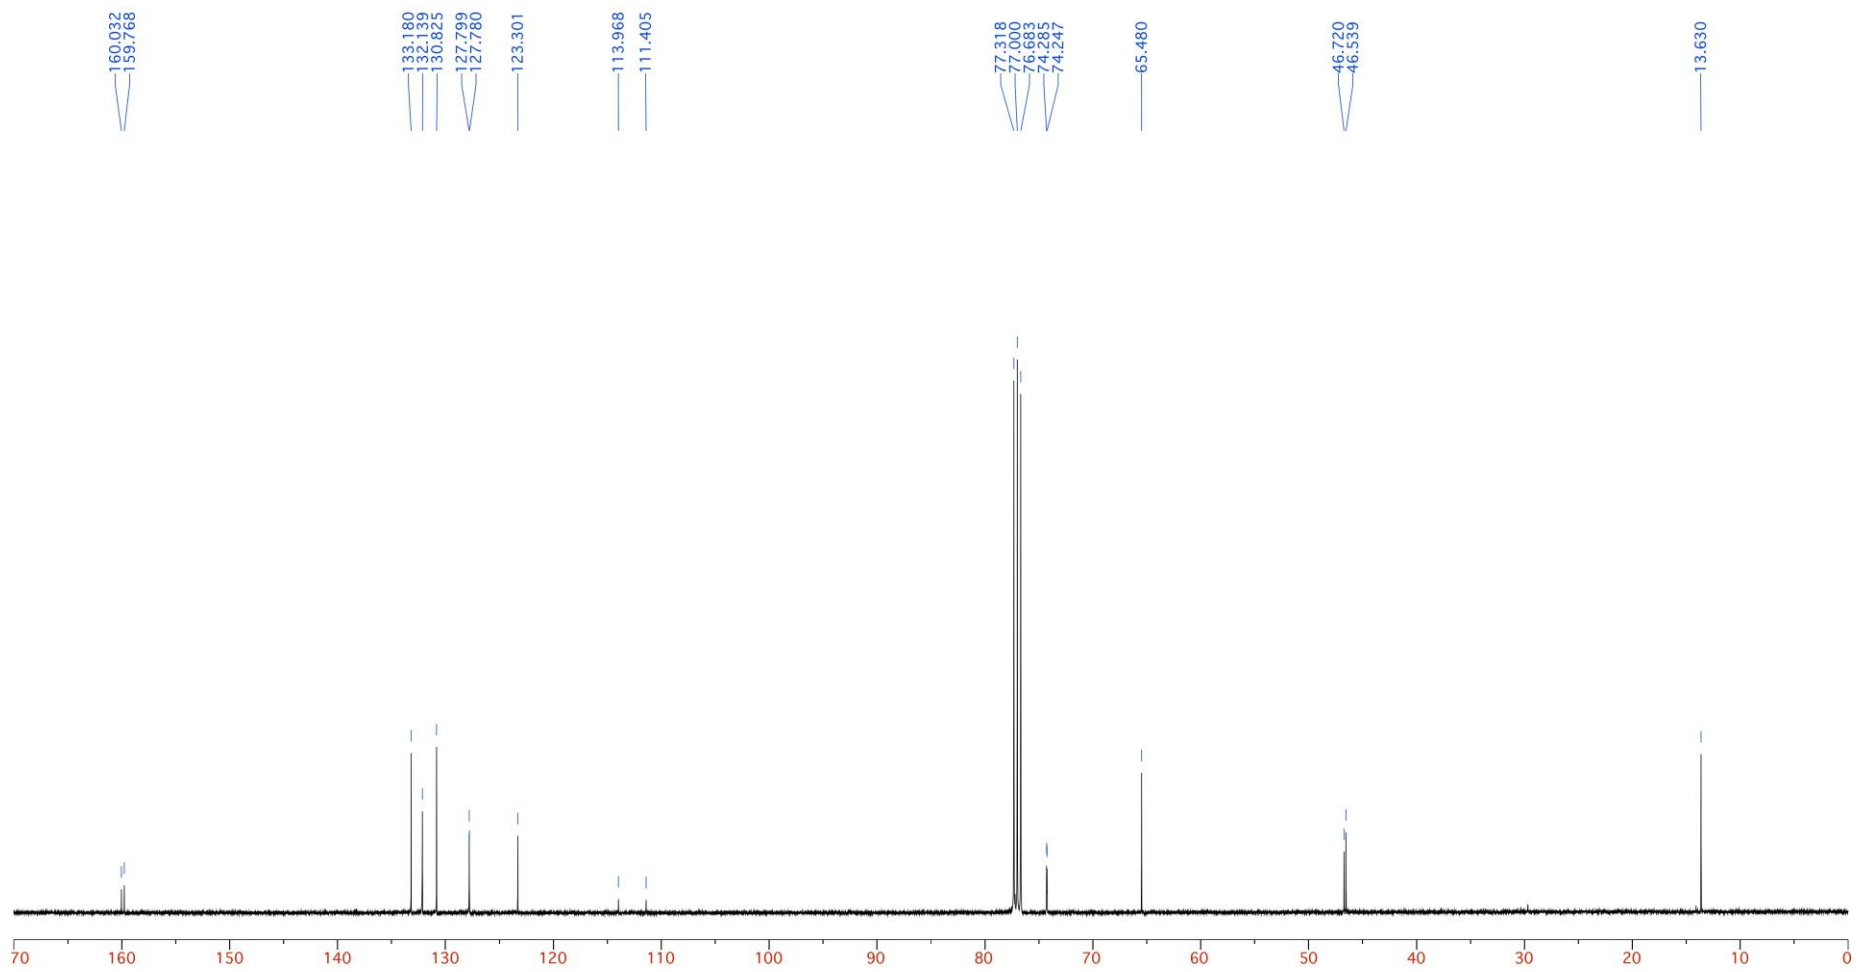

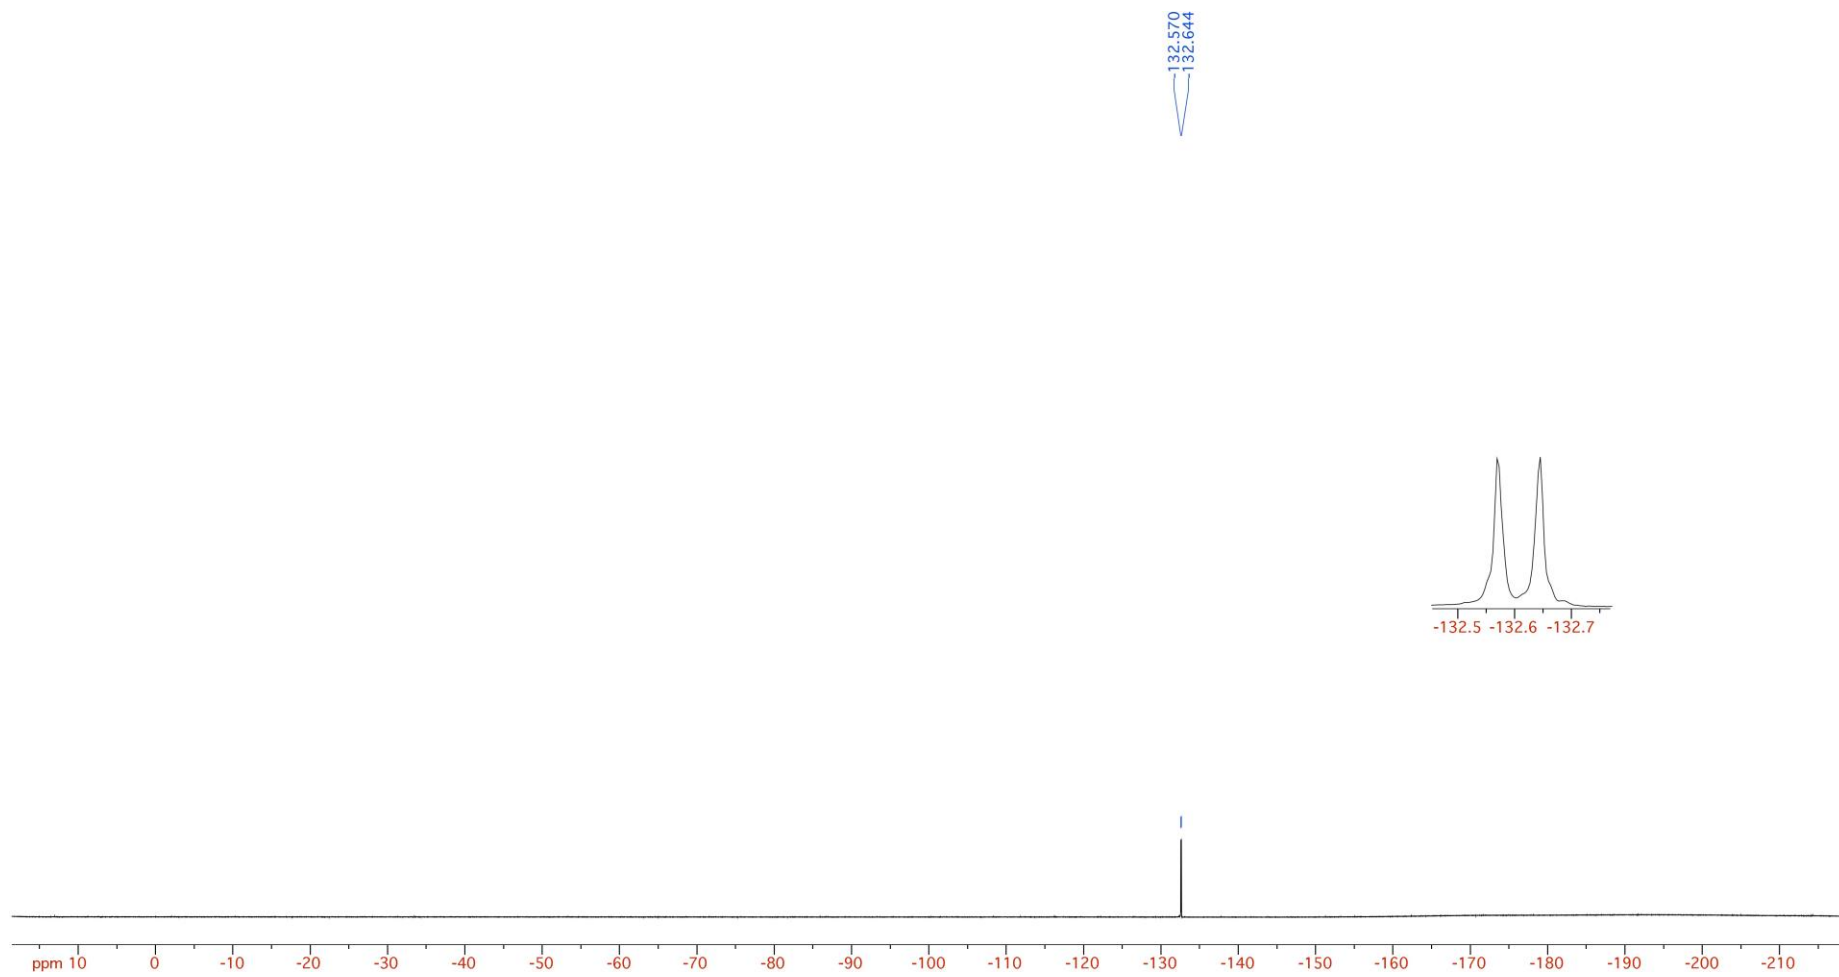

Major diastereomer (3g)

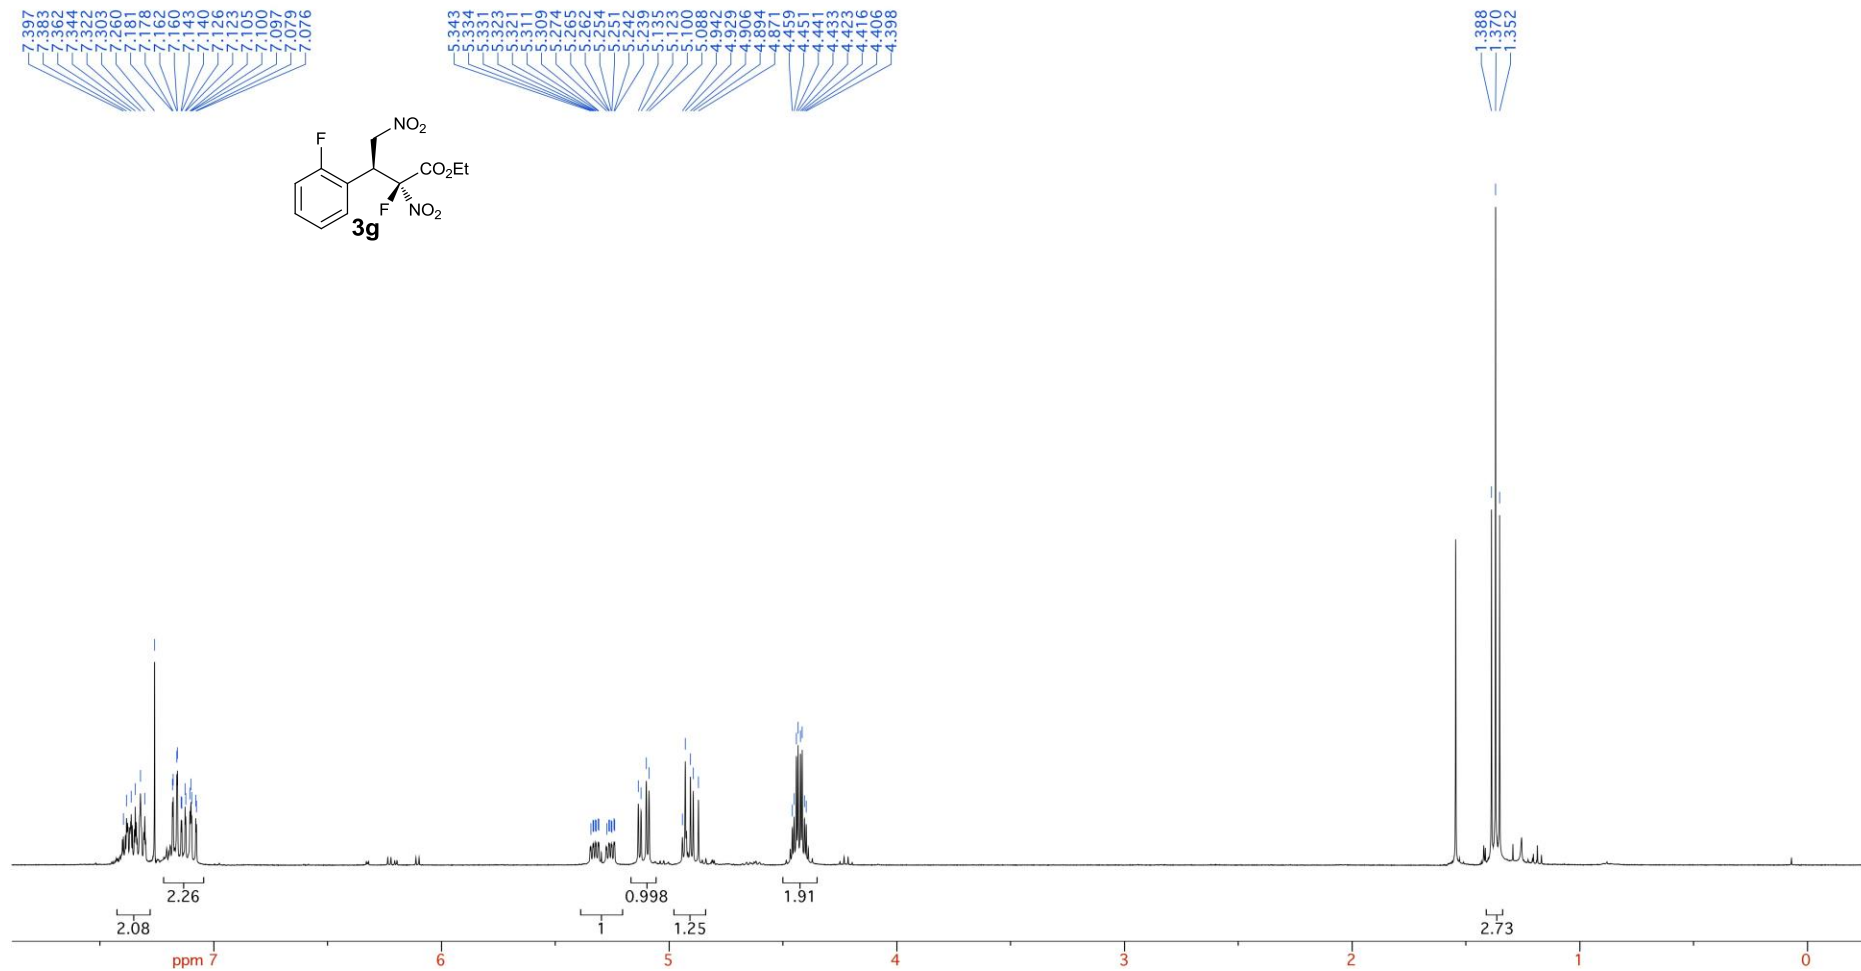

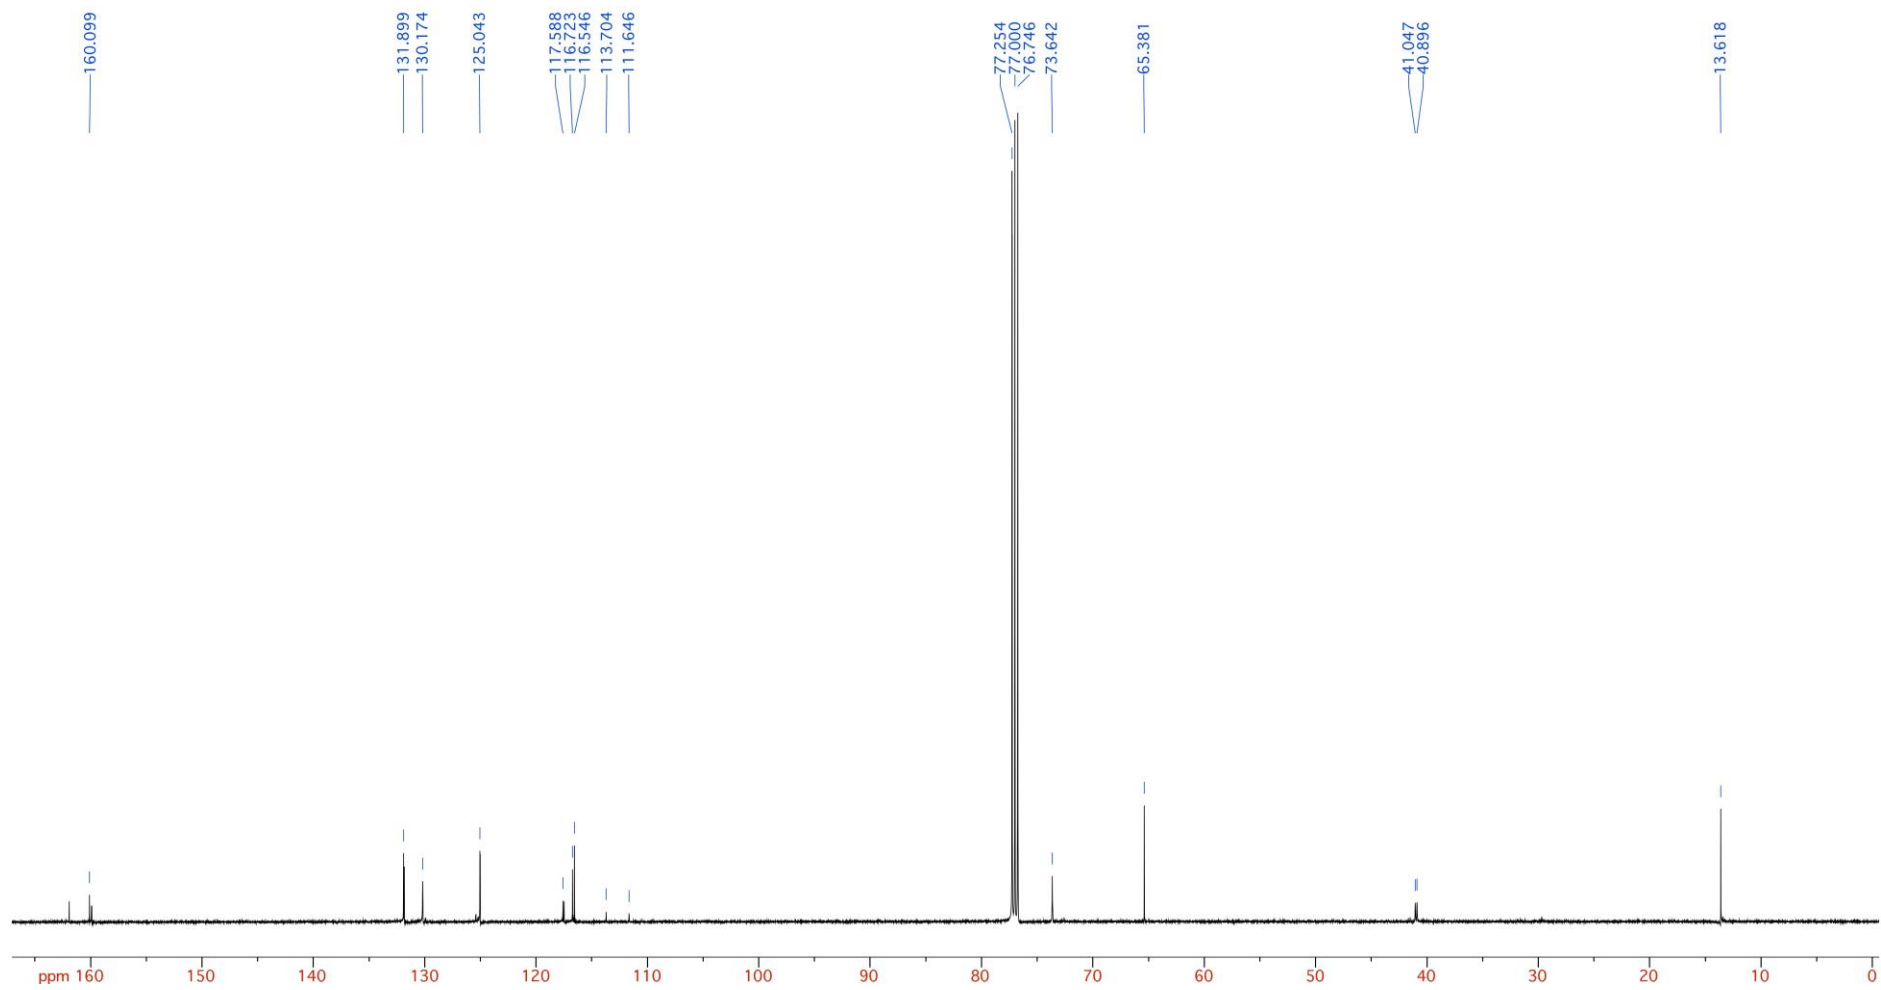

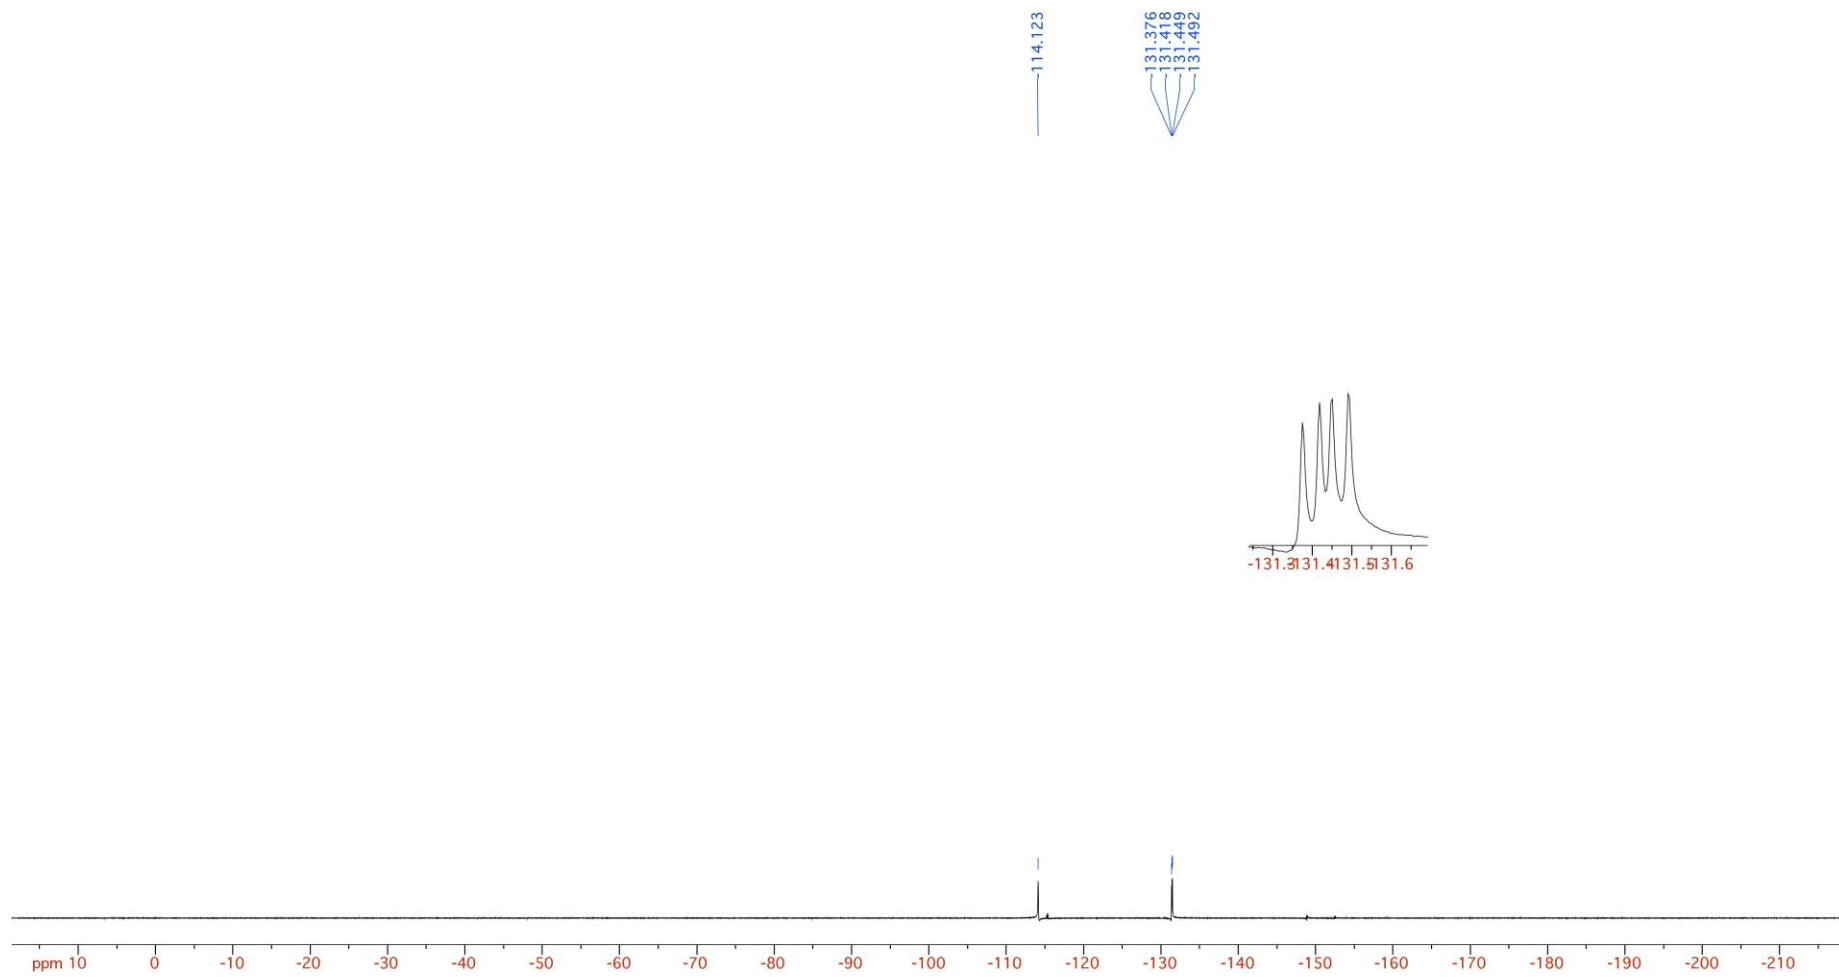

Minor diastereomer (3g', traces of major diastereomer)

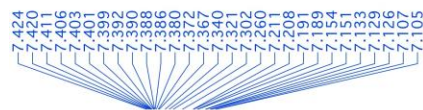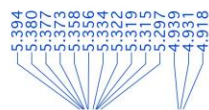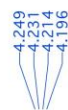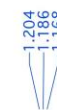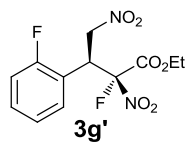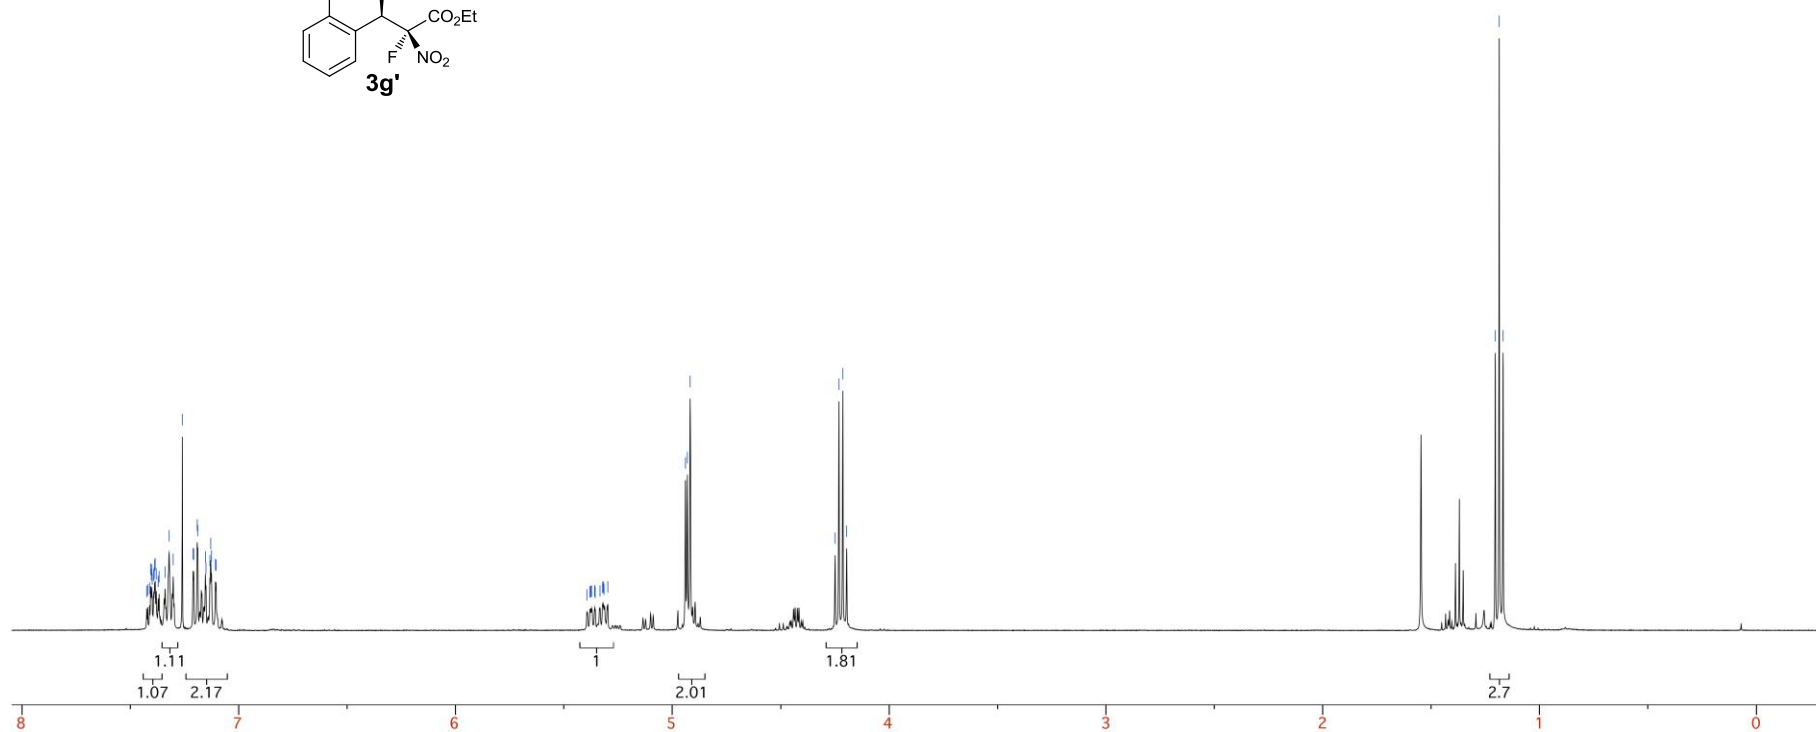

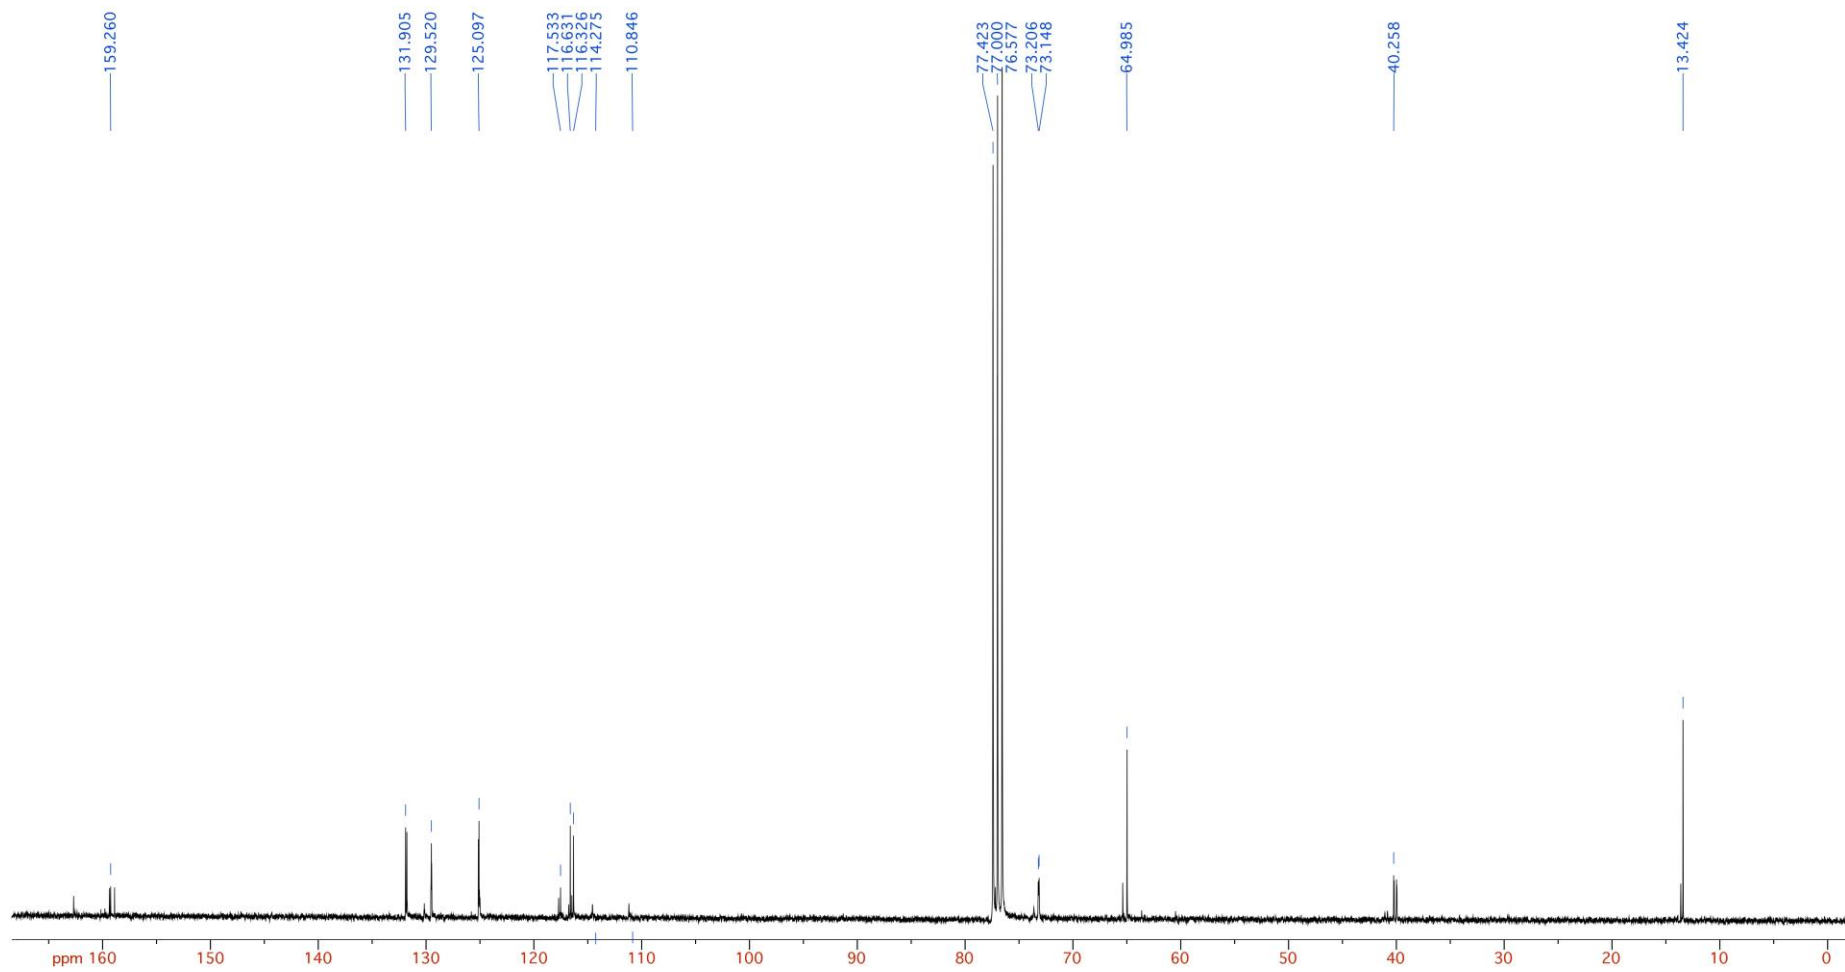

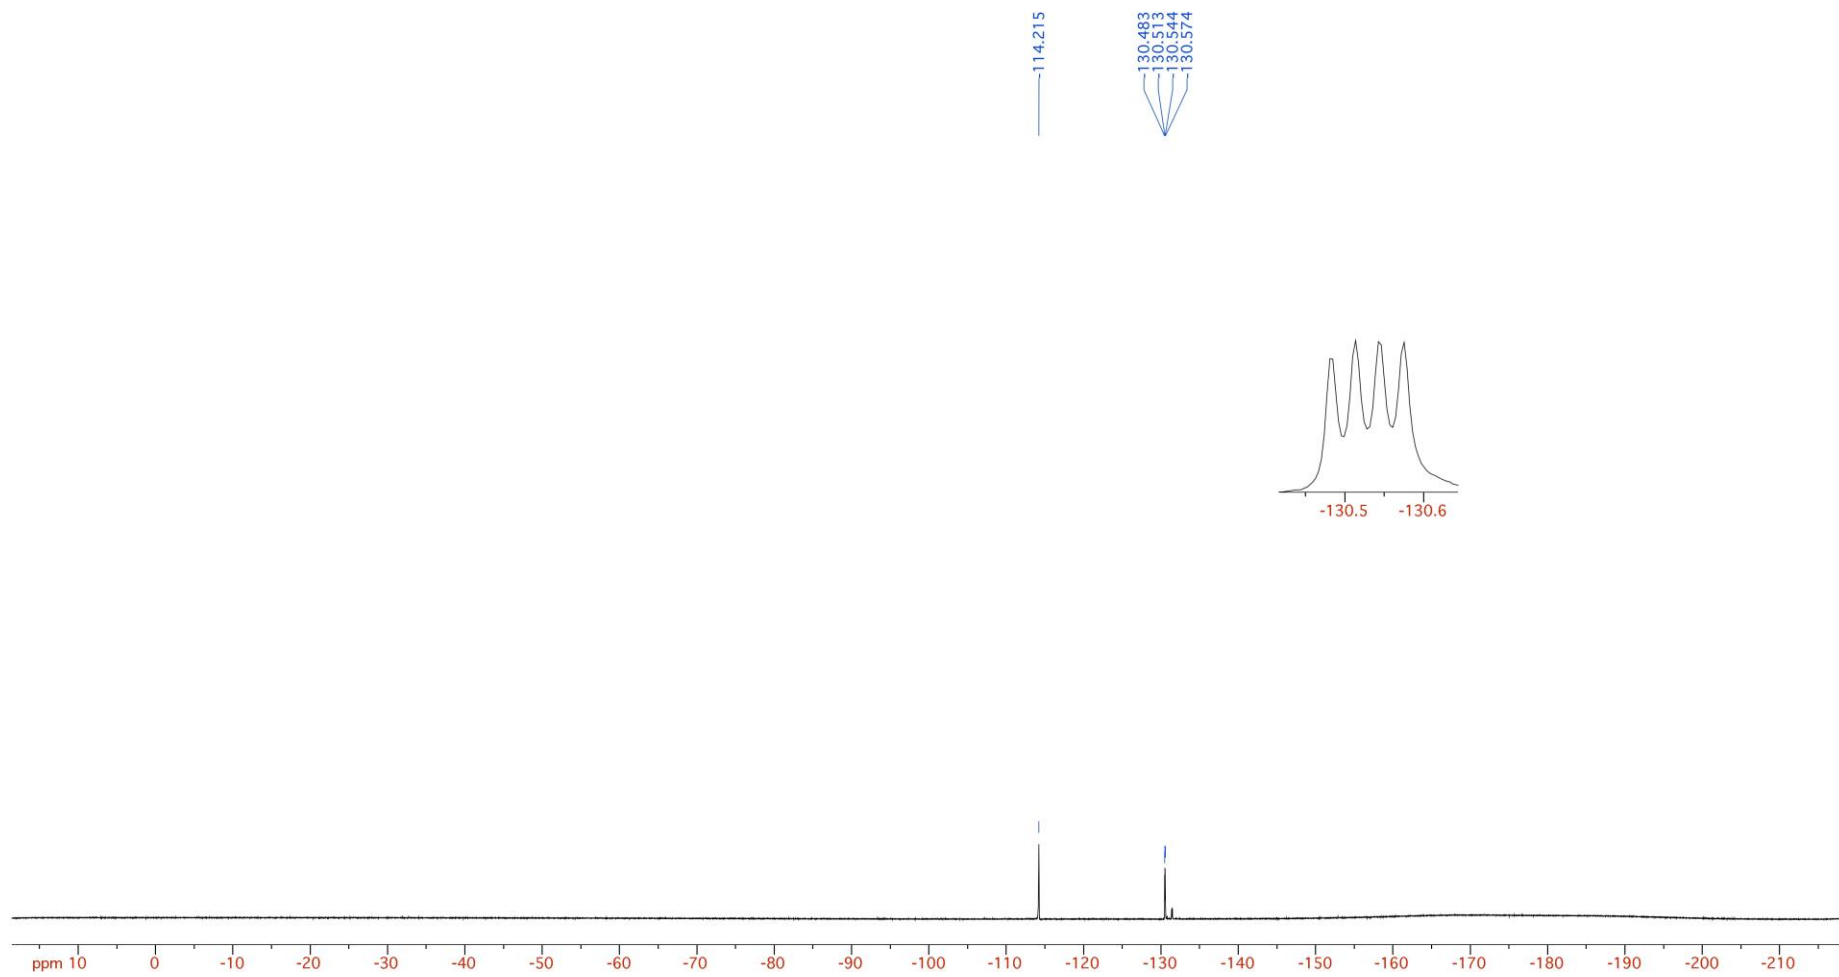



### Major diastereomer (3h)

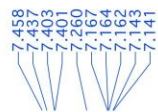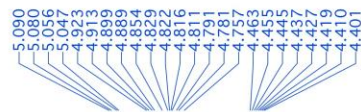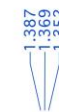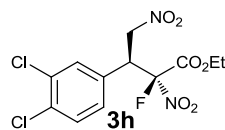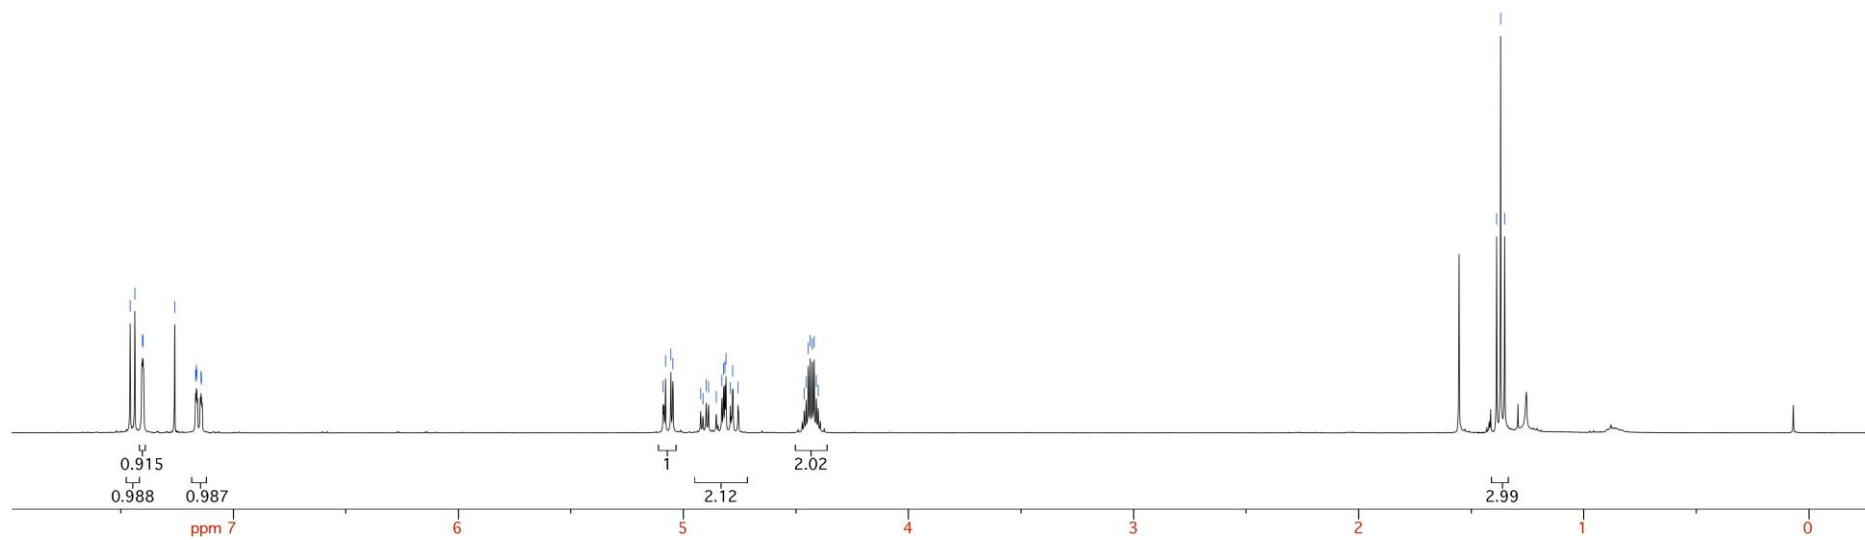

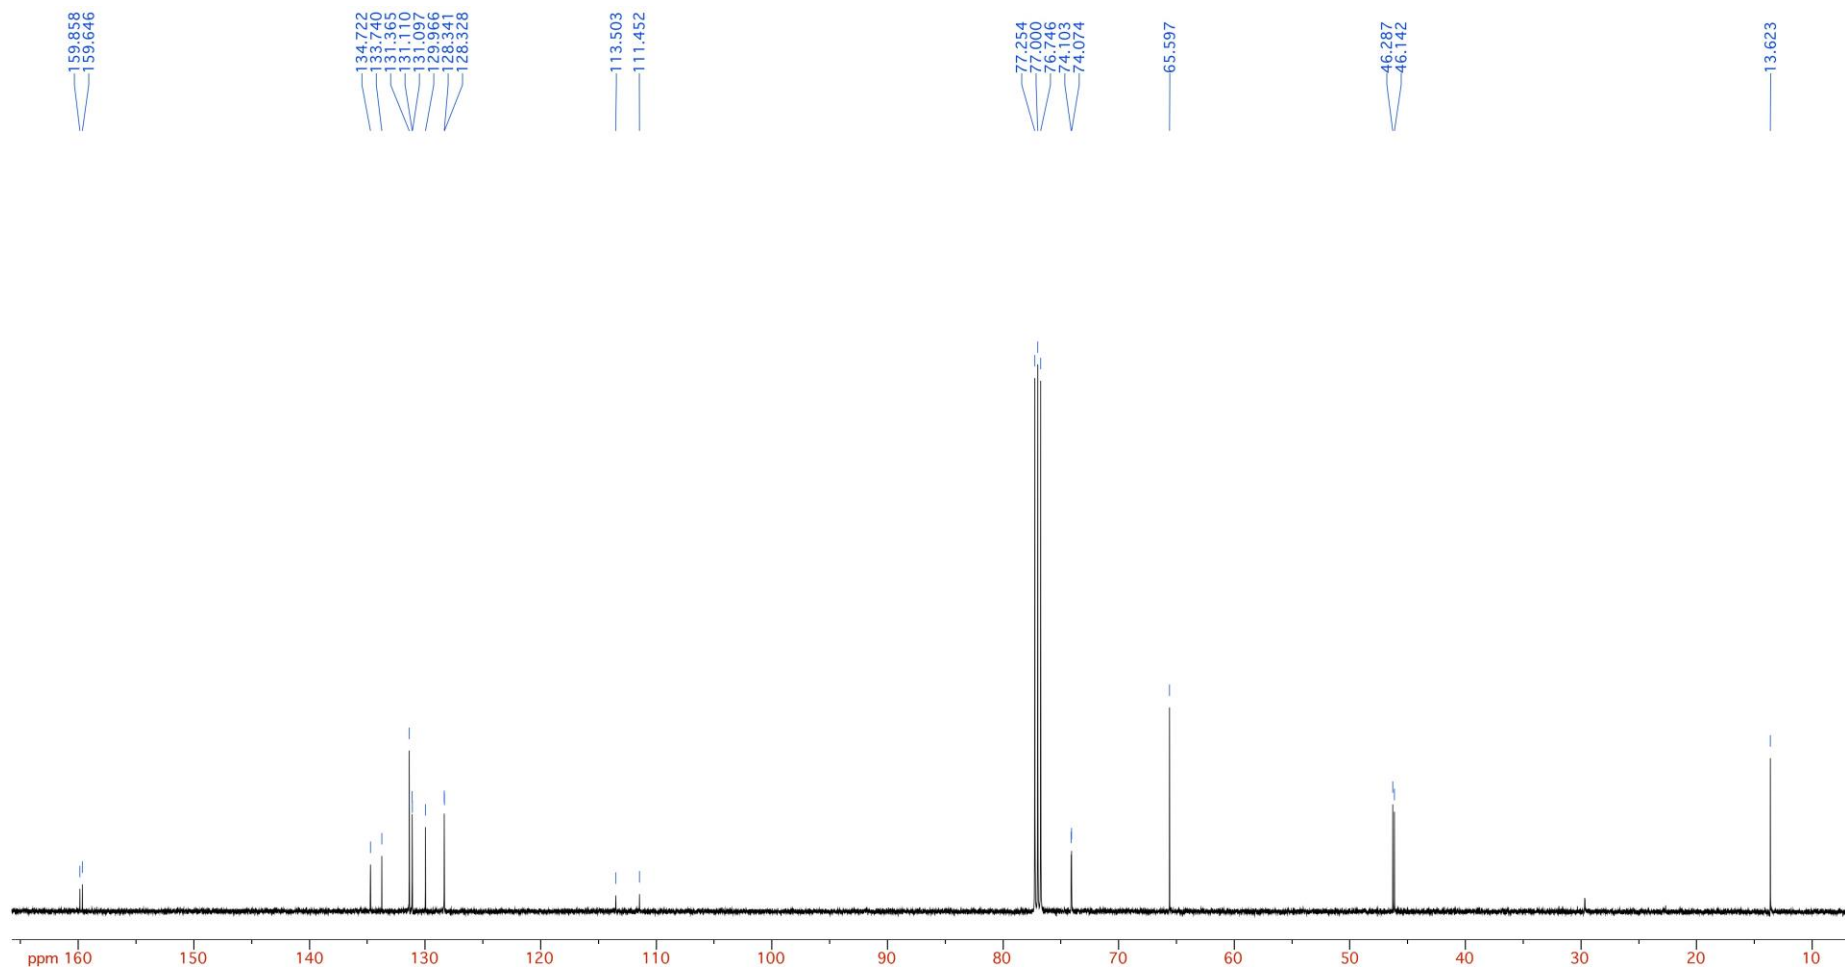

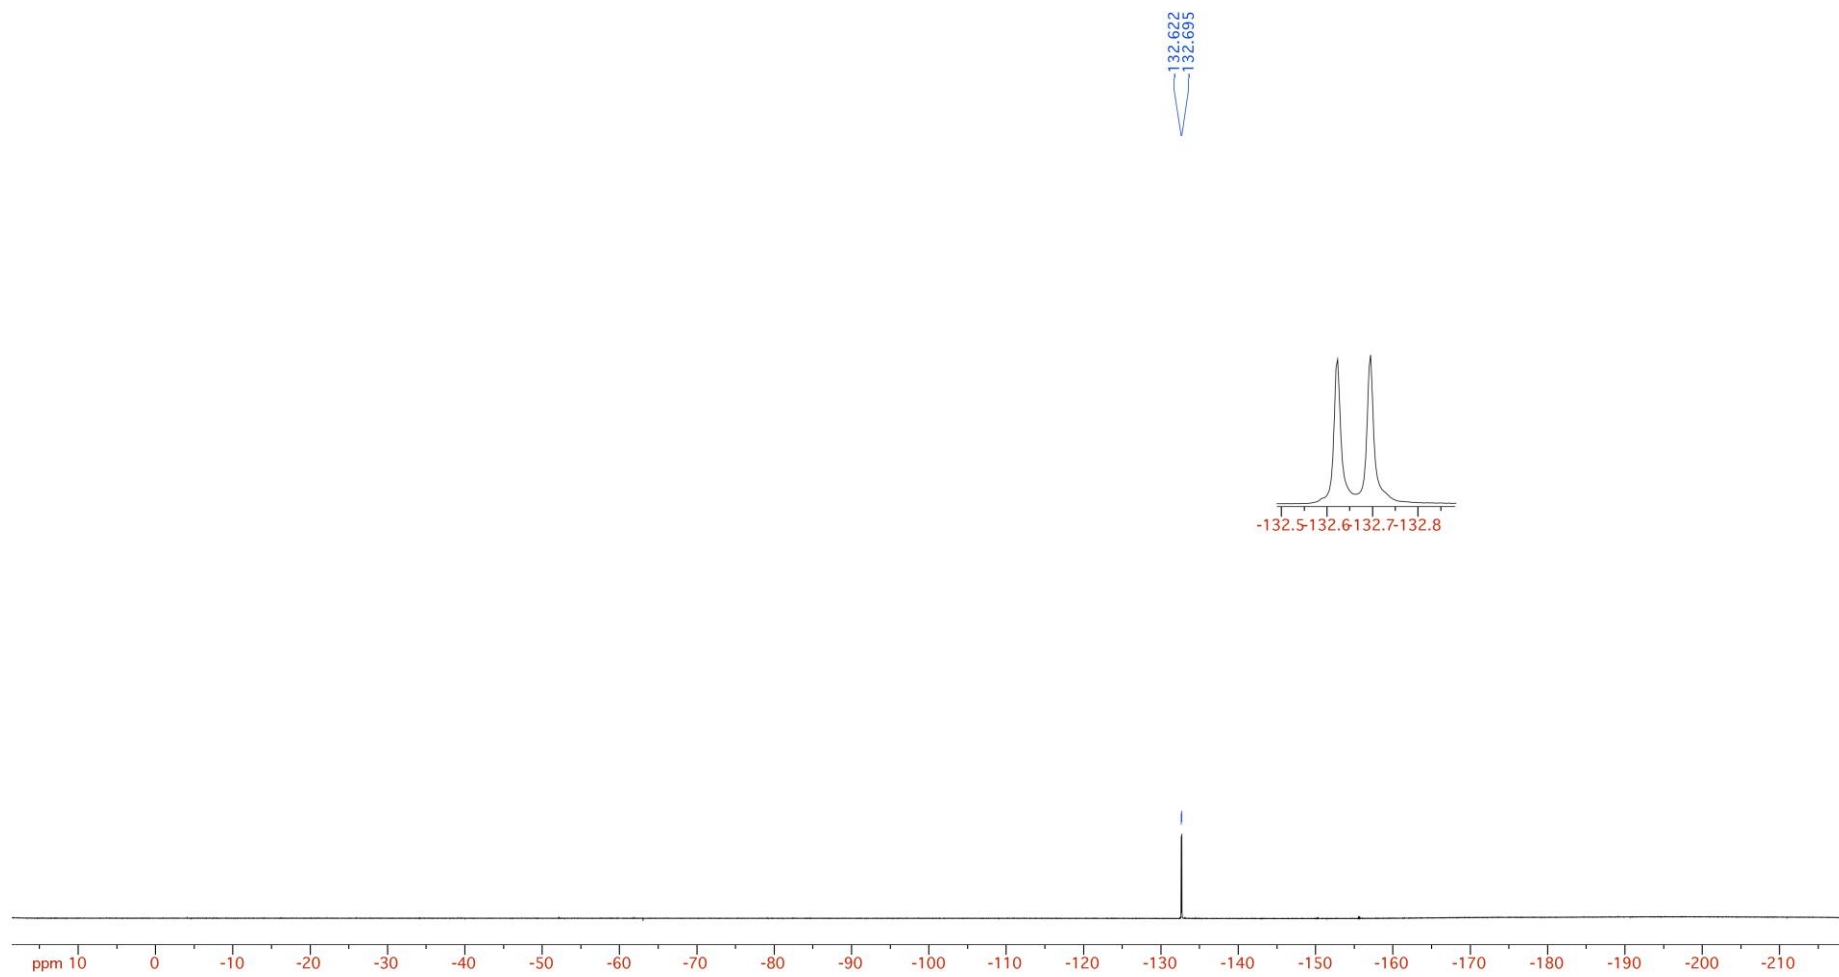

Minor diastereomer (3h')

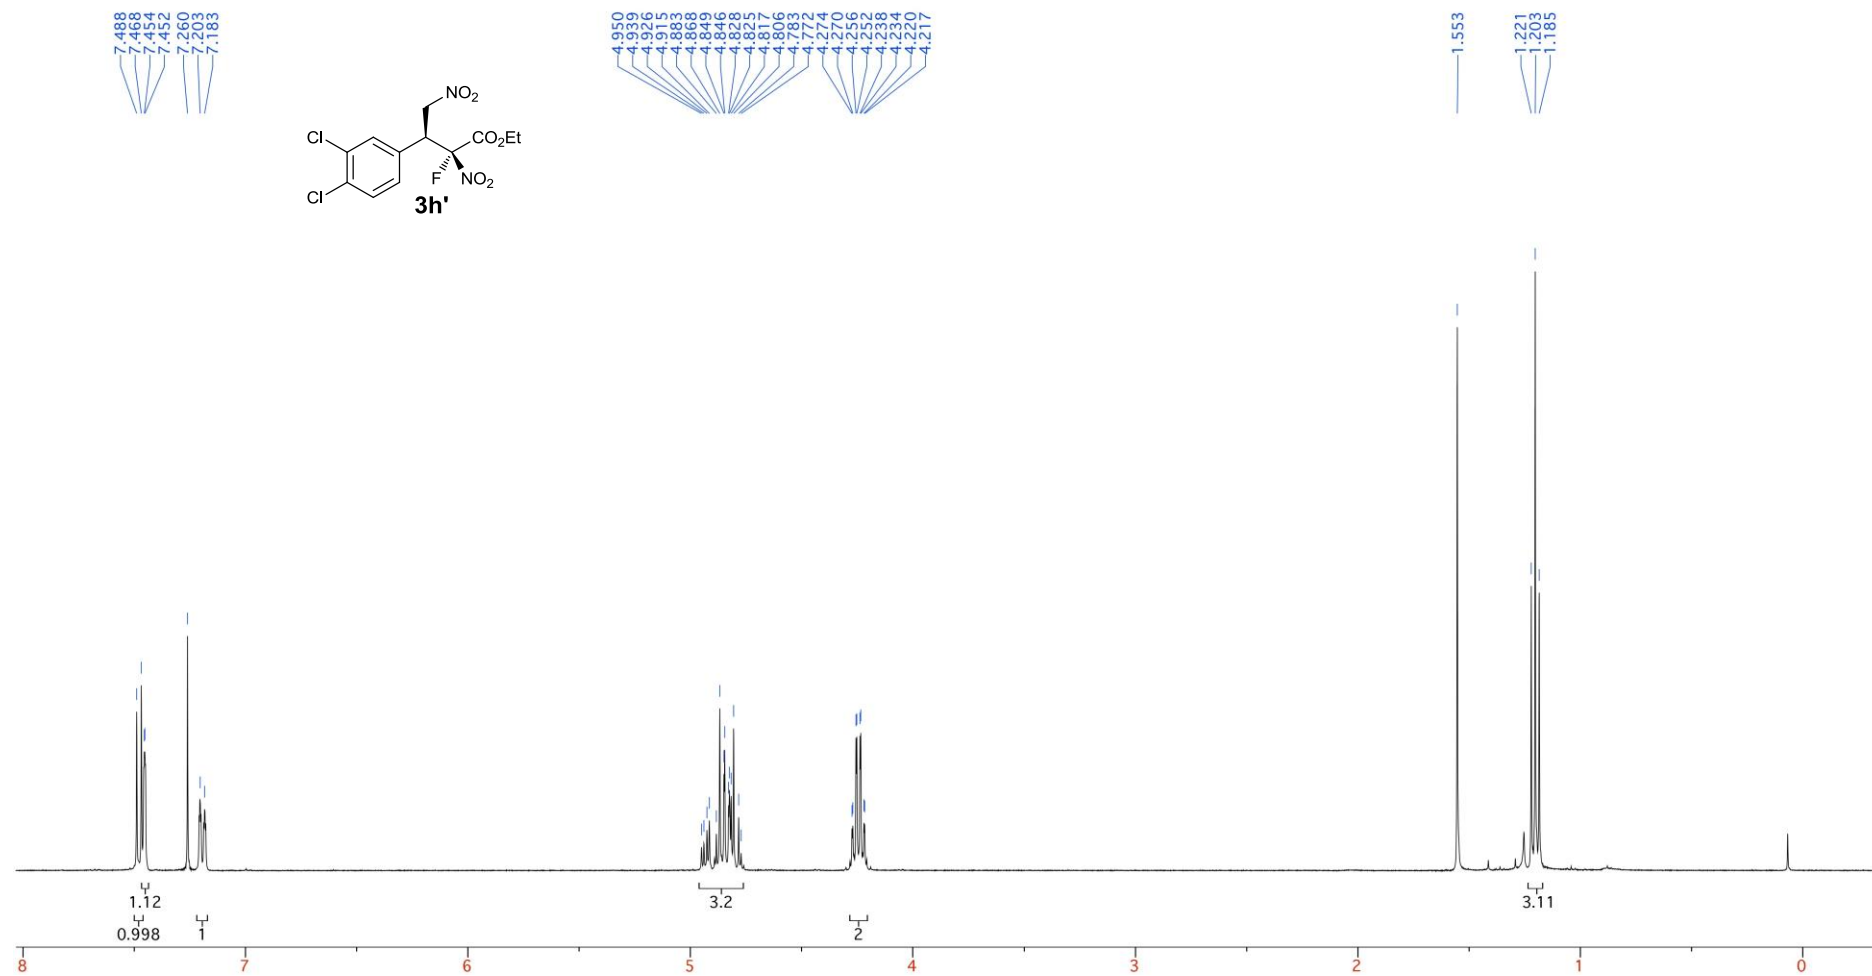

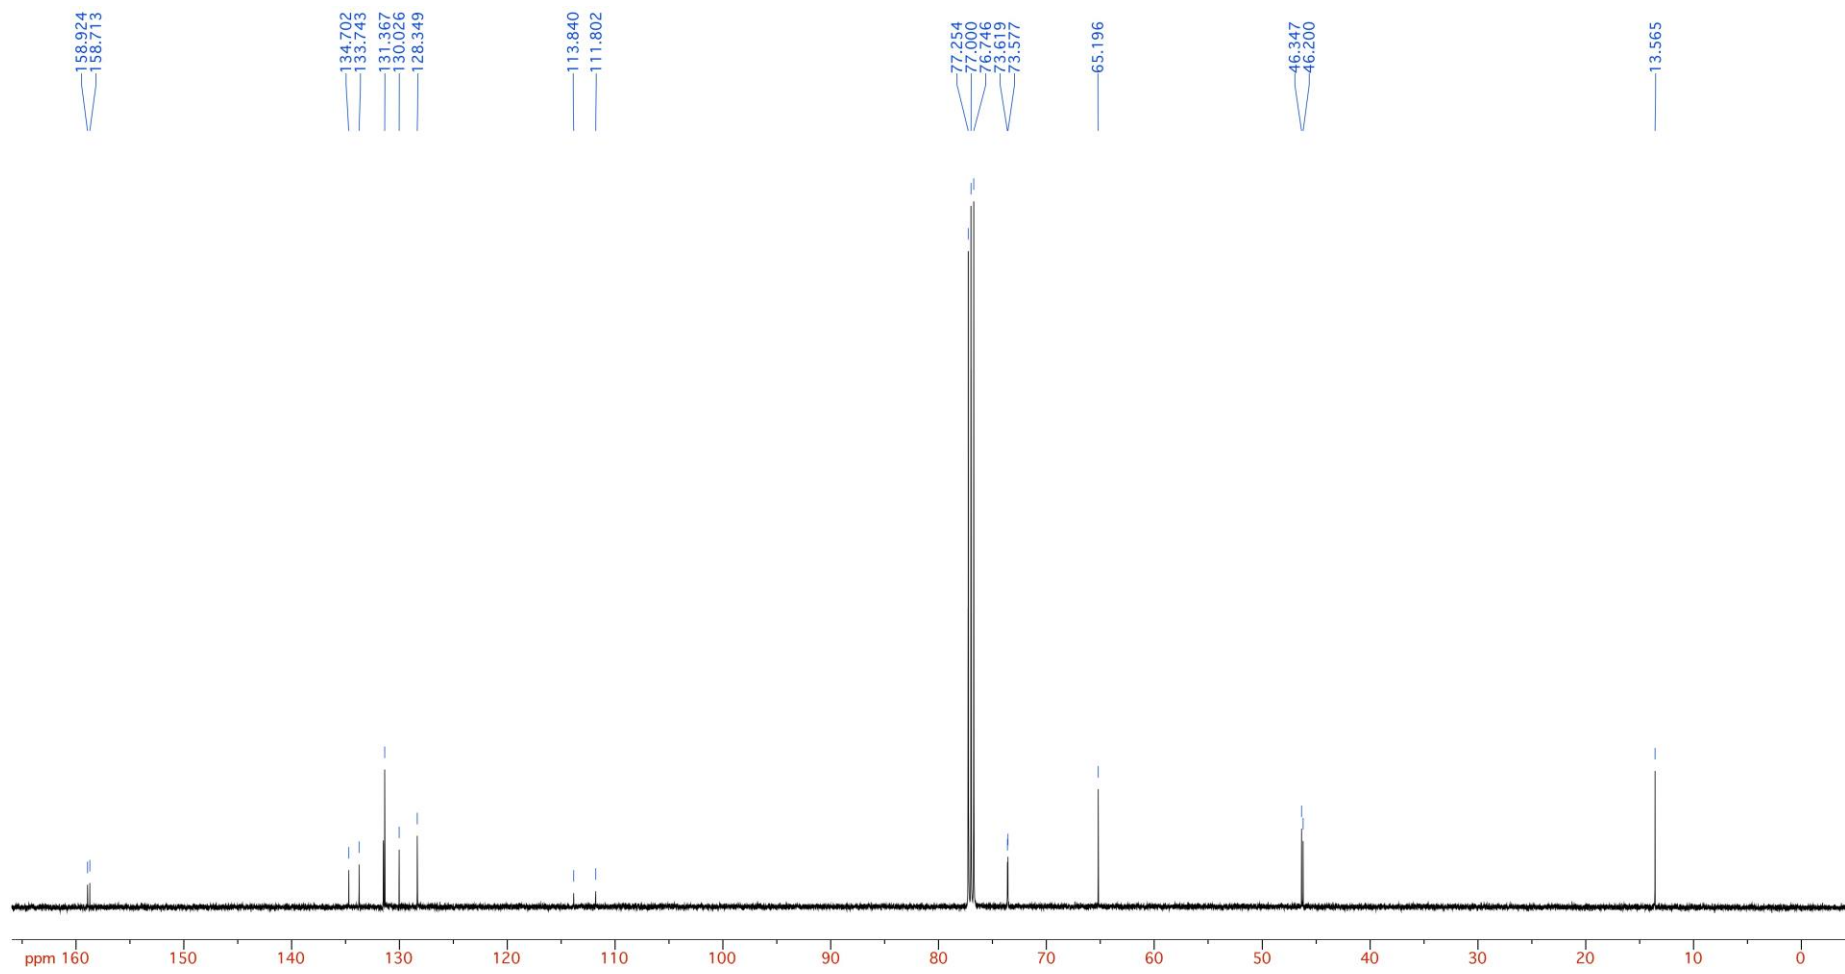

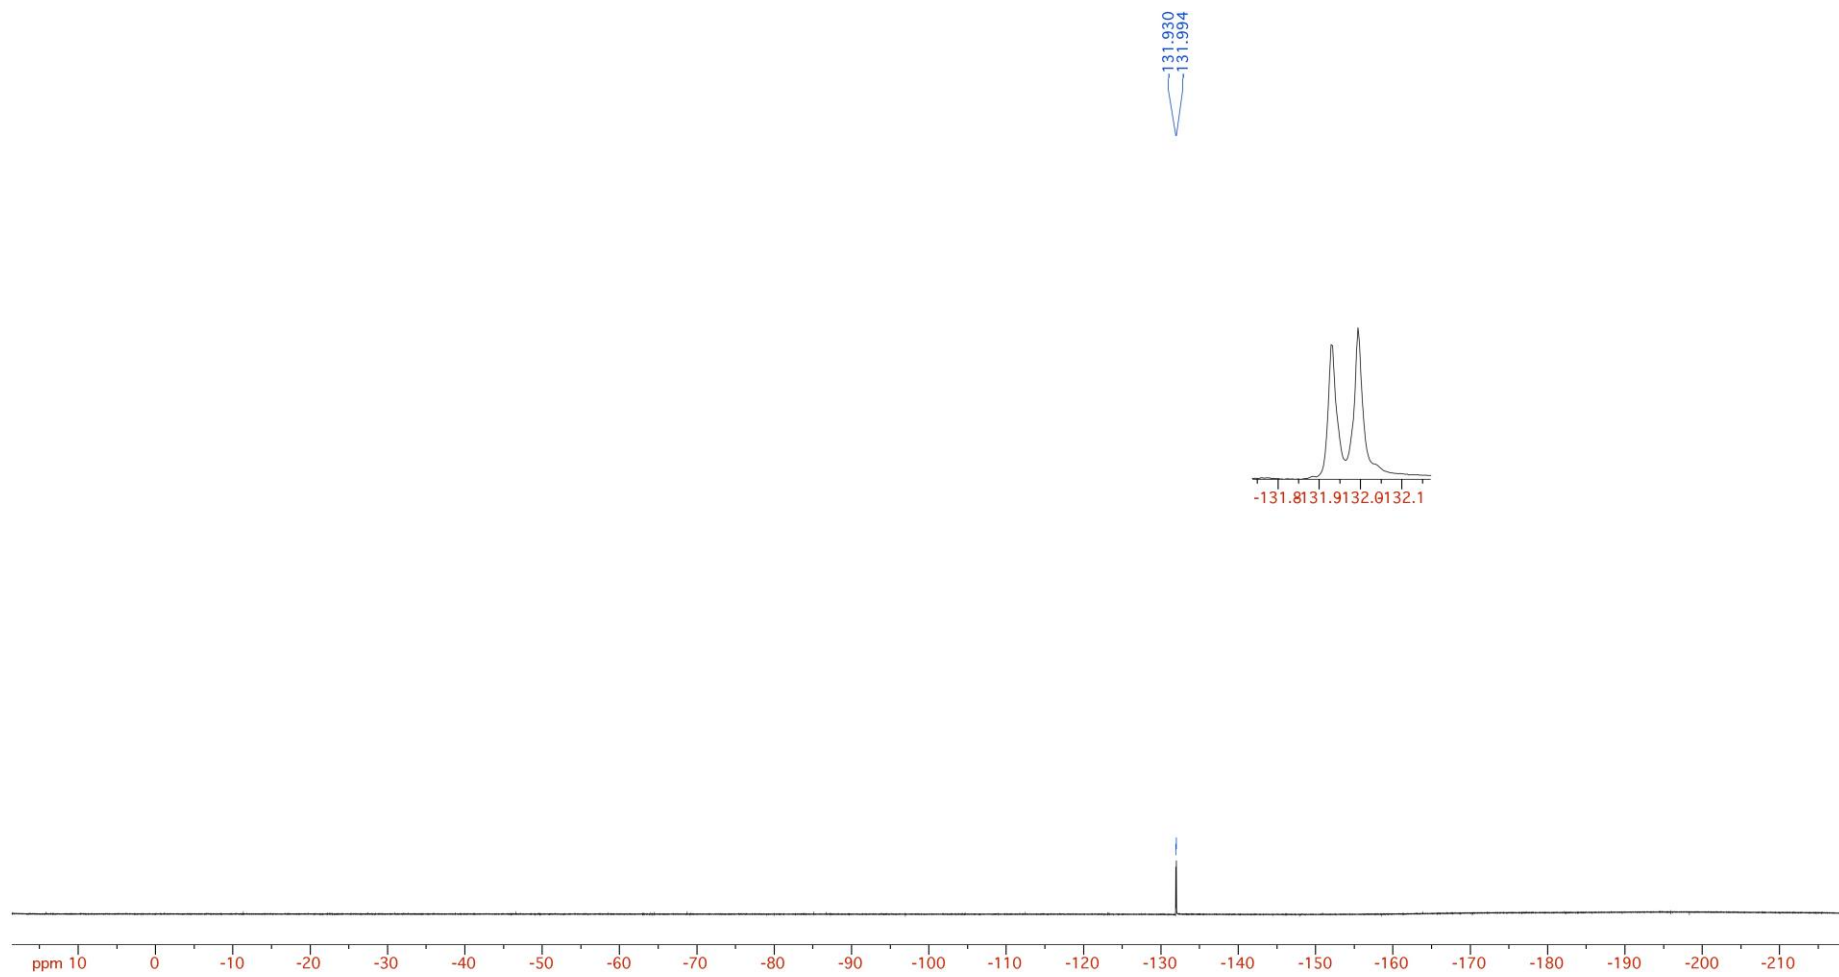

Diastereomeric mixture (3i)

7.255  
6.873  
6.870  
6.867  
6.853  
6.850  
6.838  
6.814  
6.798  
6.782  
6.728

5.050  
5.041  
5.024  
5.016  
4.890  
4.884  
4.870  
4.866  
4.858  
4.853  
4.840  
4.821  
4.812  
4.806  
4.797  
4.791  
4.773  
4.427  
4.418  
4.413  
4.404  
4.209  
4.195  
4.180  
4.166  
3.873  
3.861  
3.848

1.379  
1.364  
1.350  
1.172  
1.158  
1.143

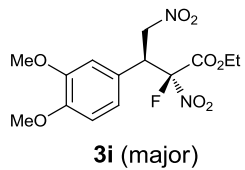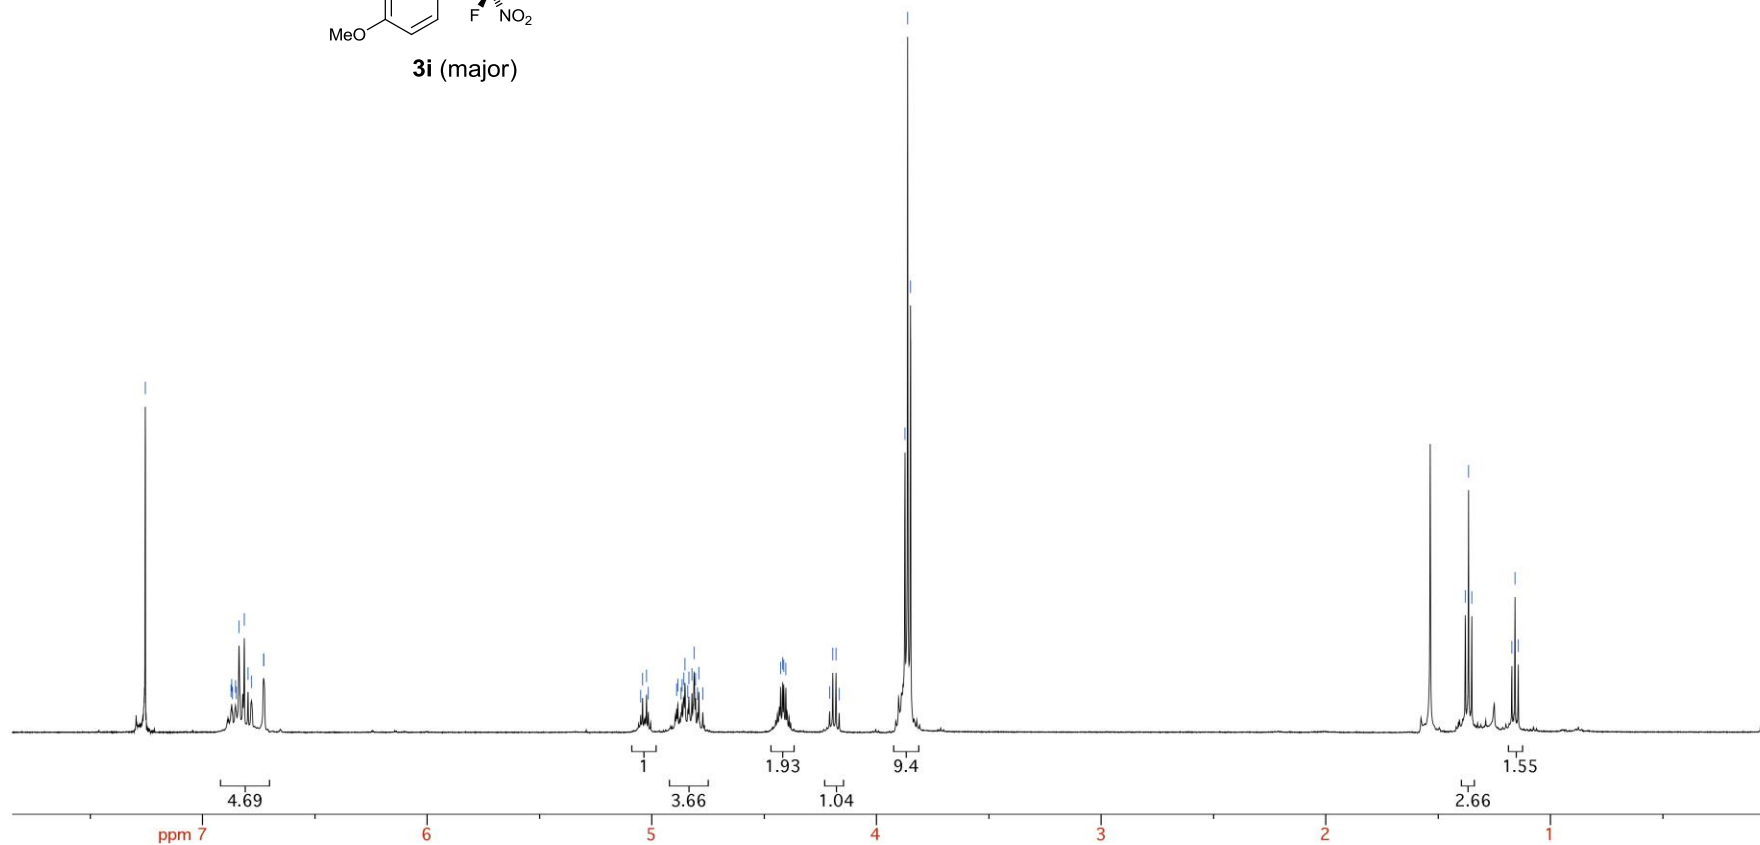

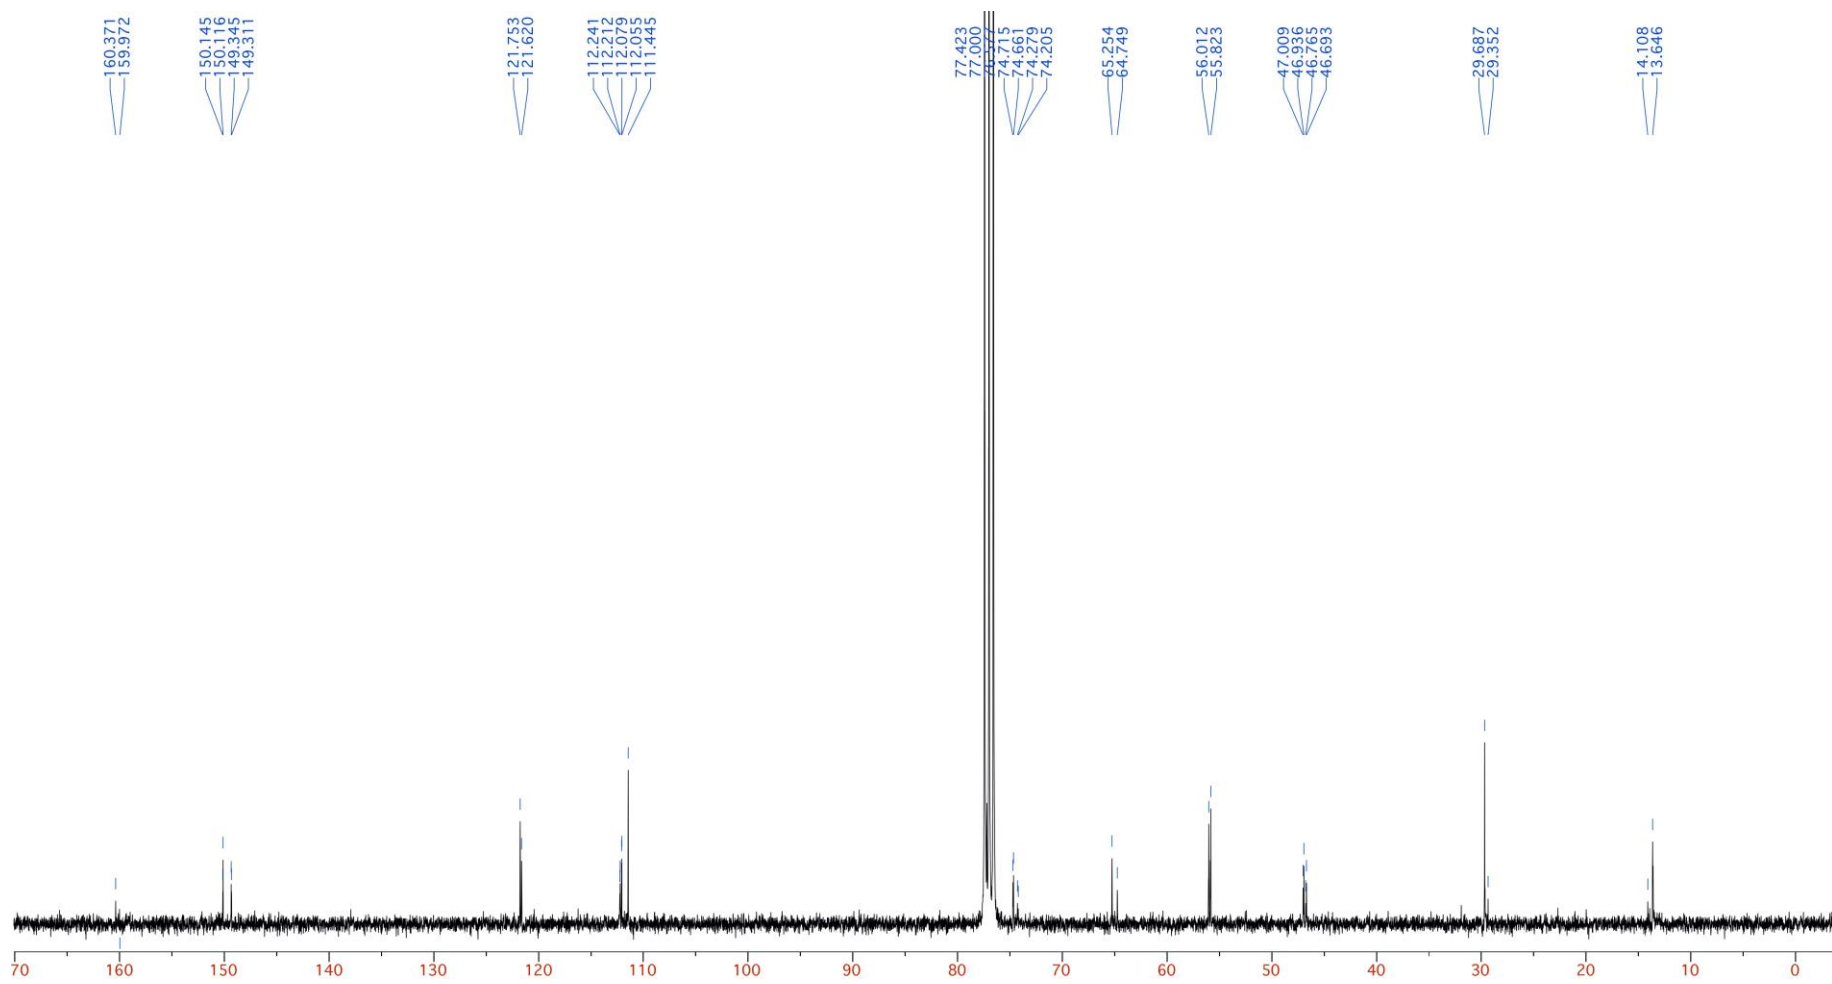



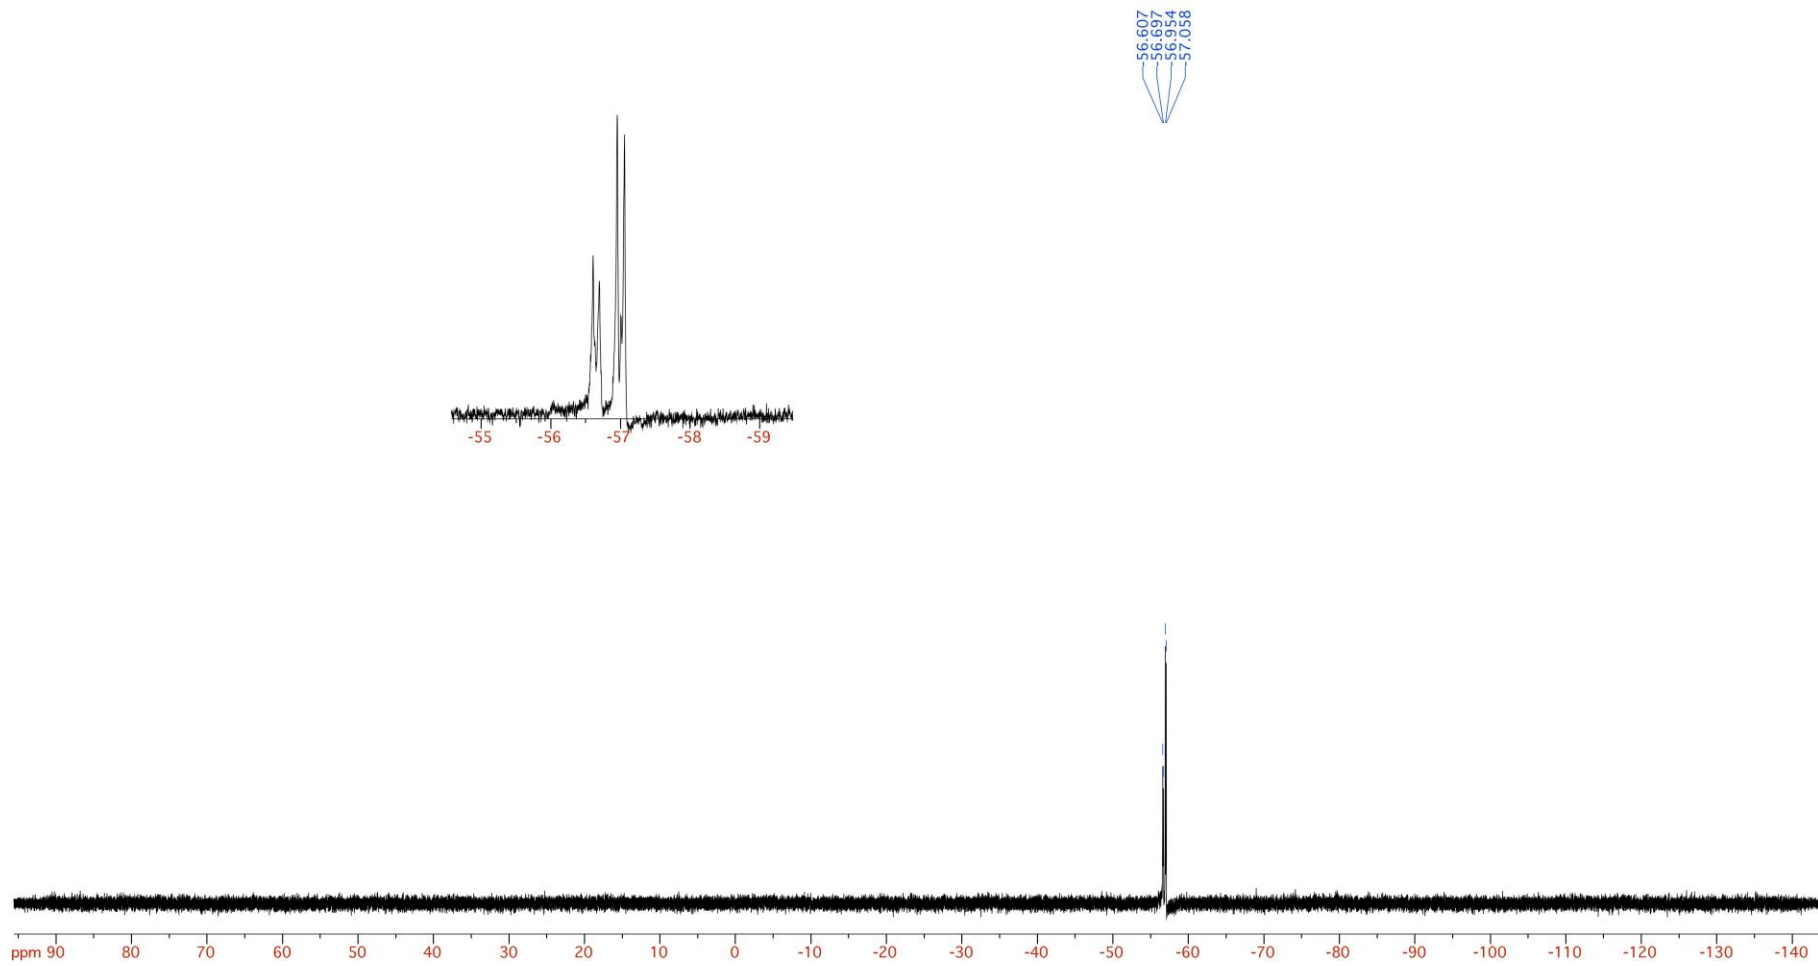

### Major diastereomer (3j)

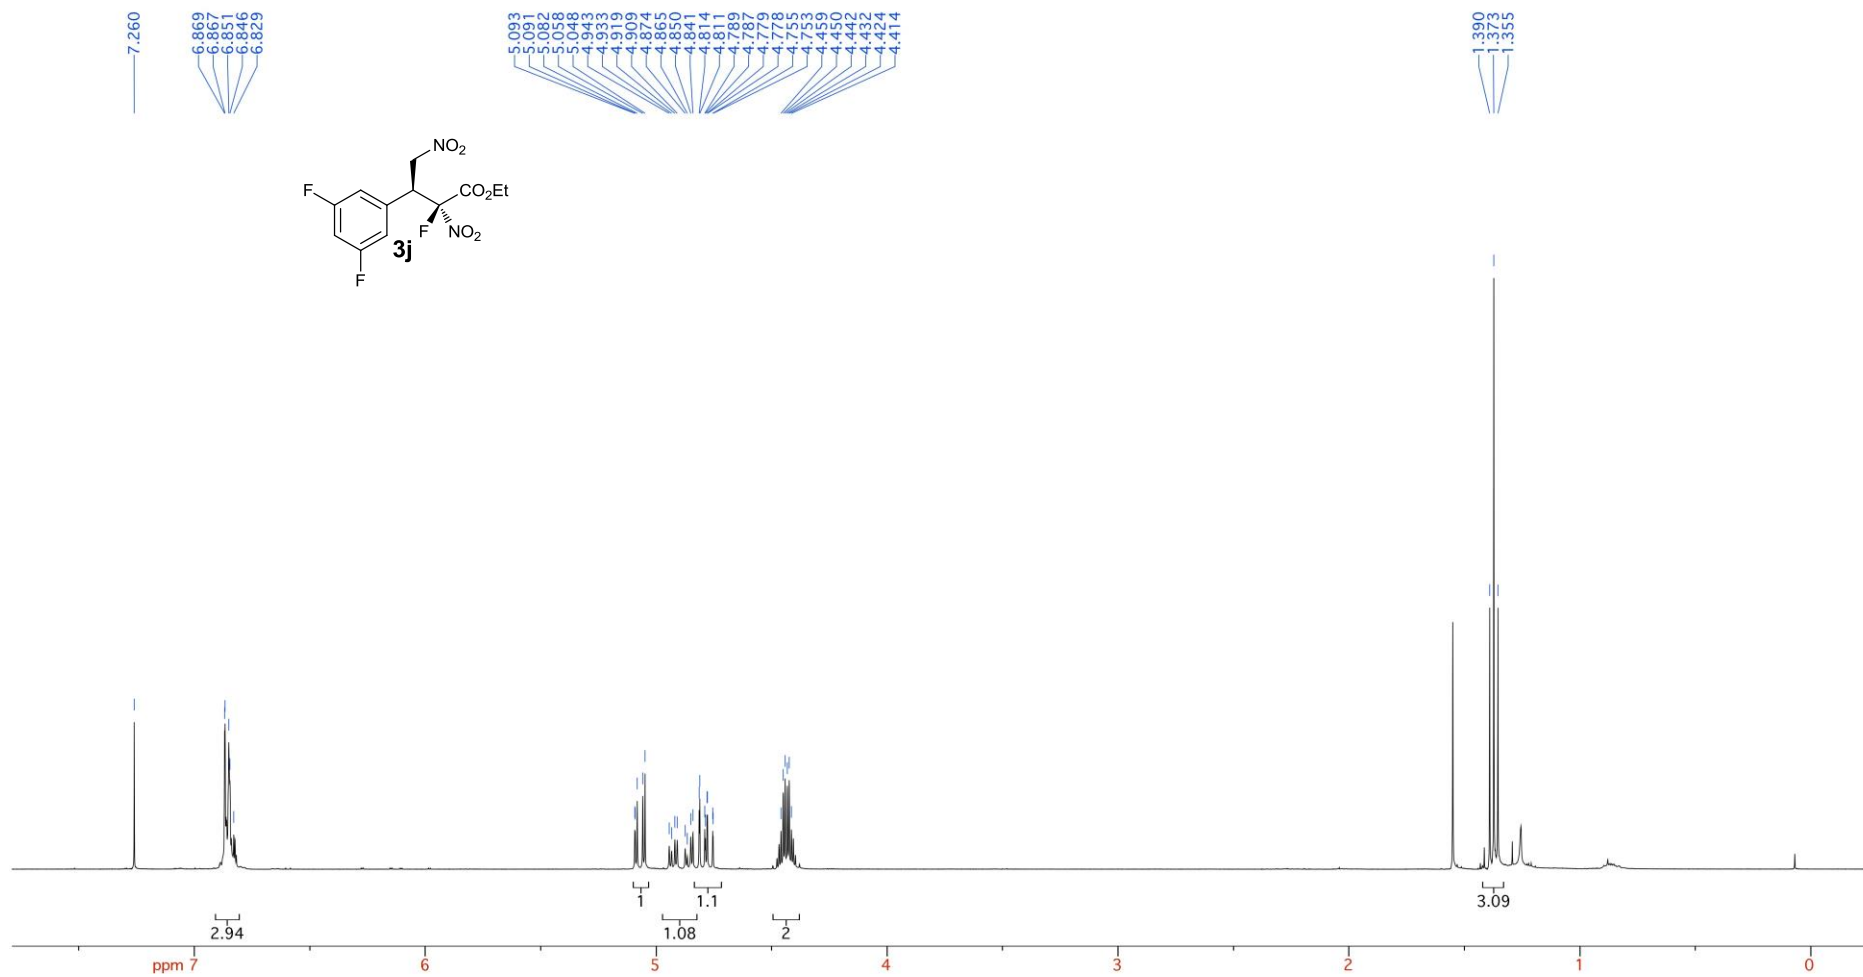

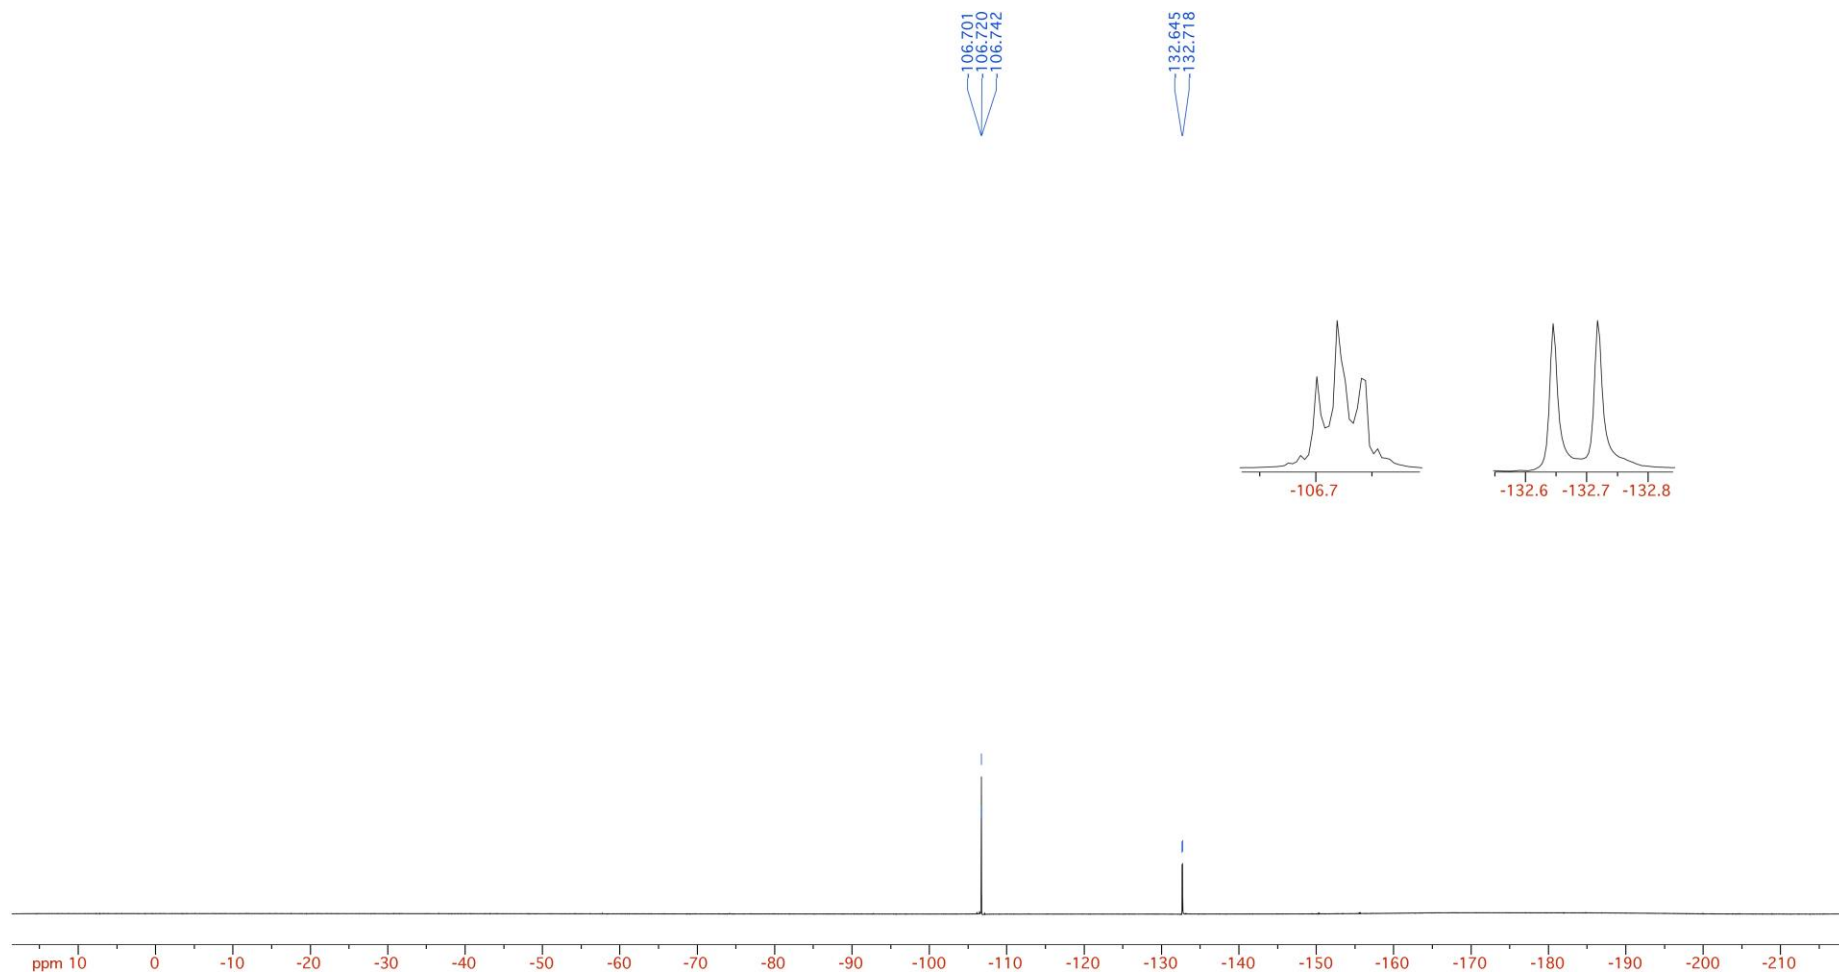

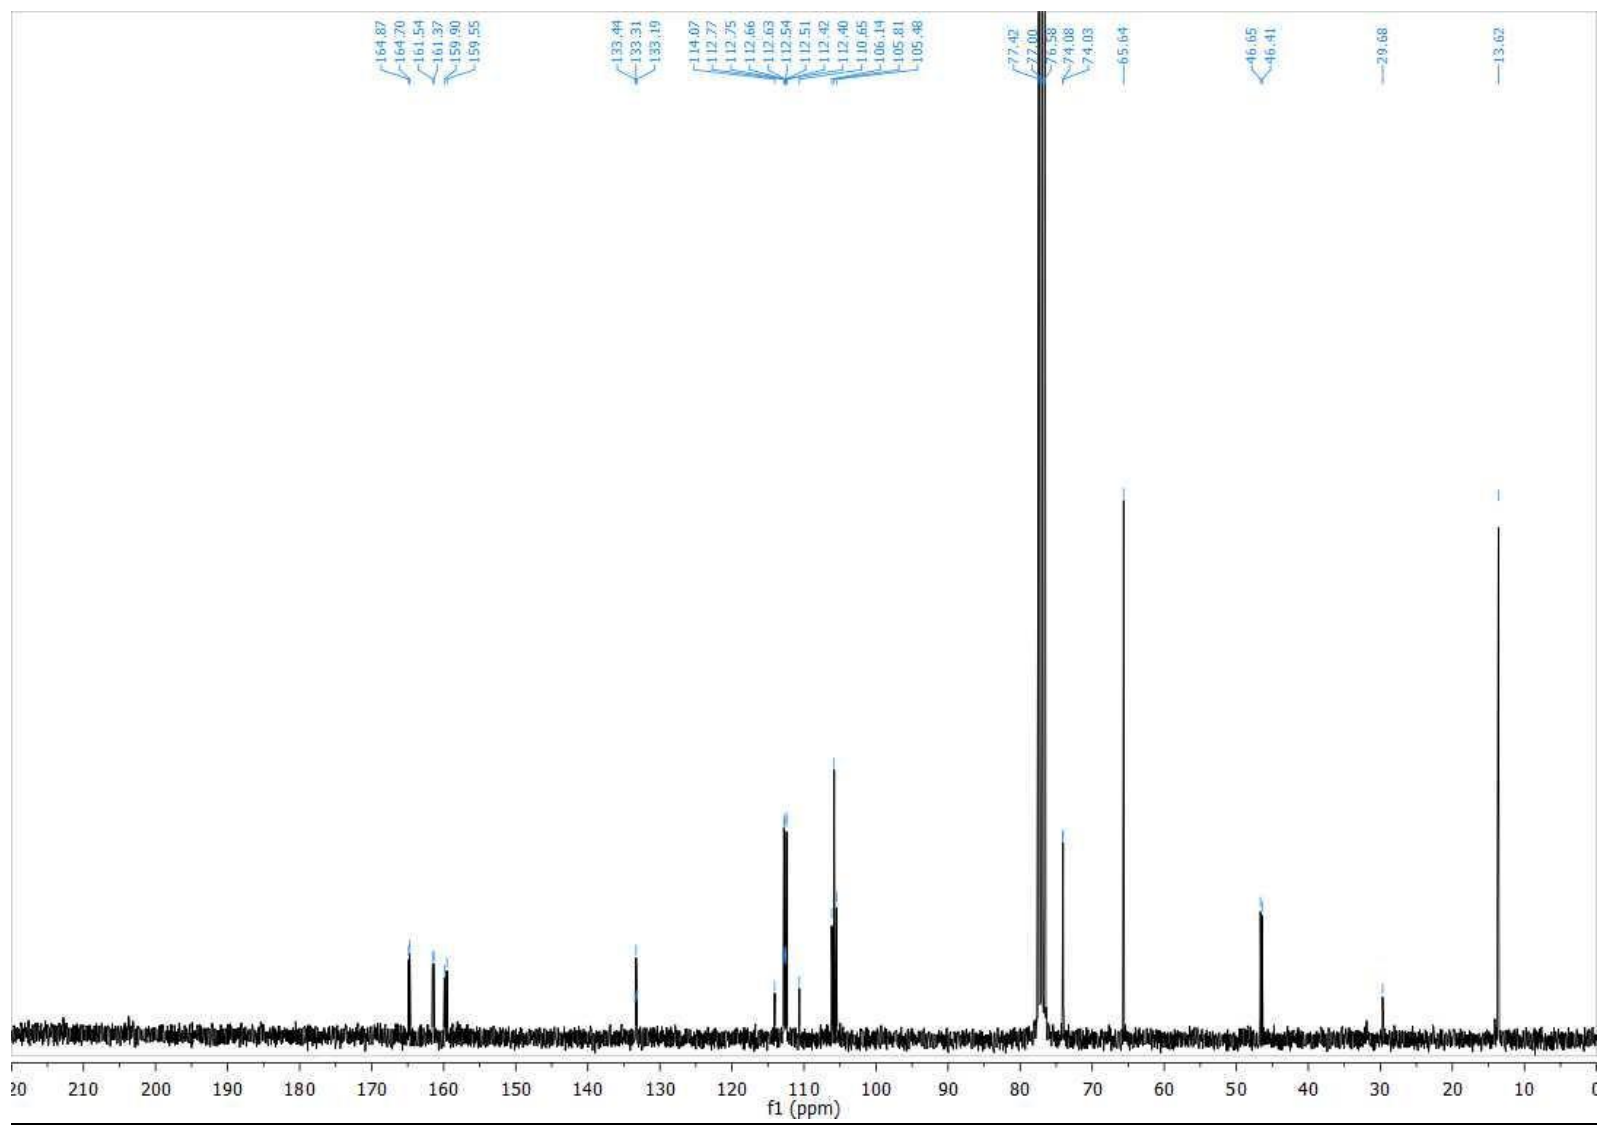

Minor diastereomer (3j)

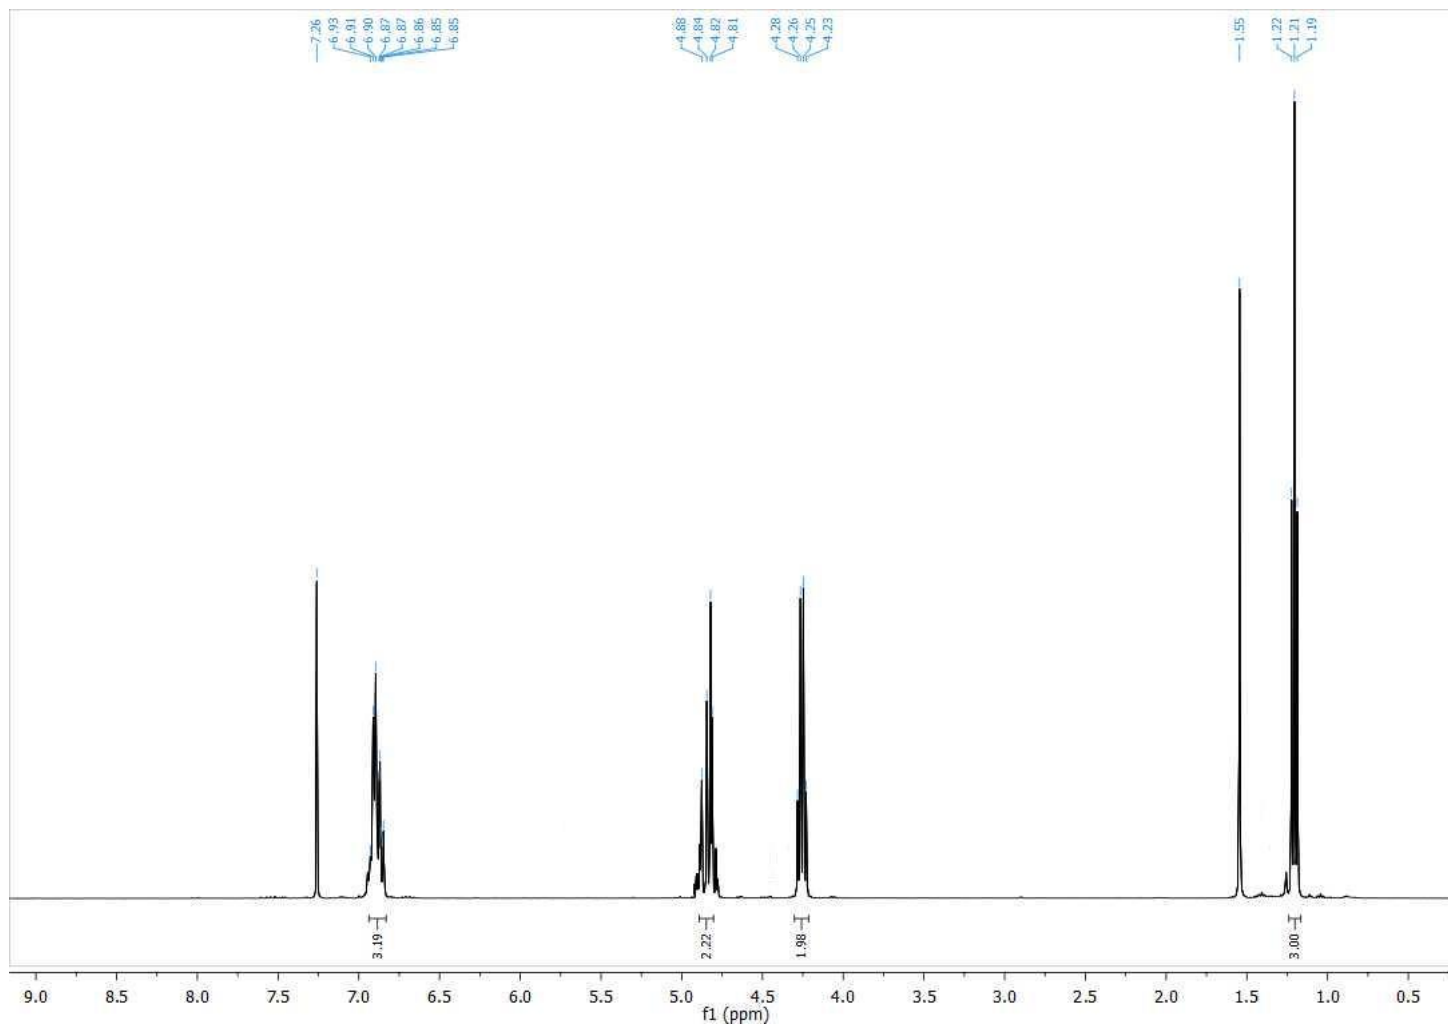

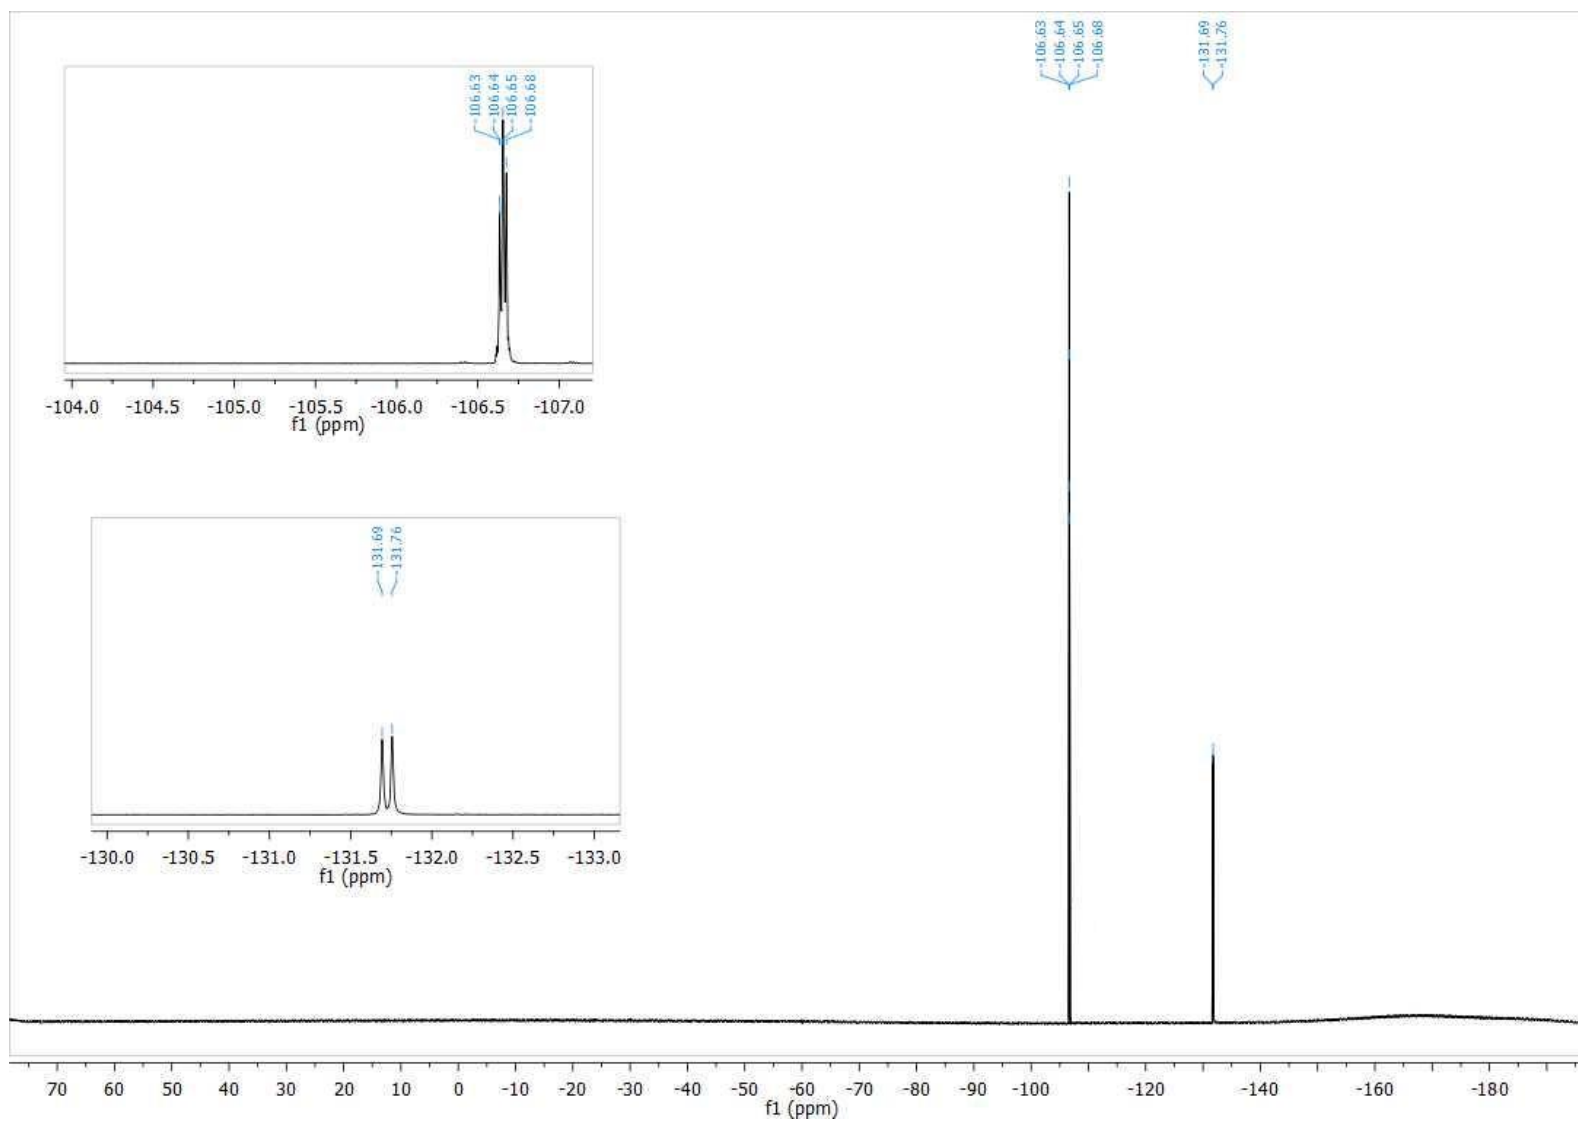

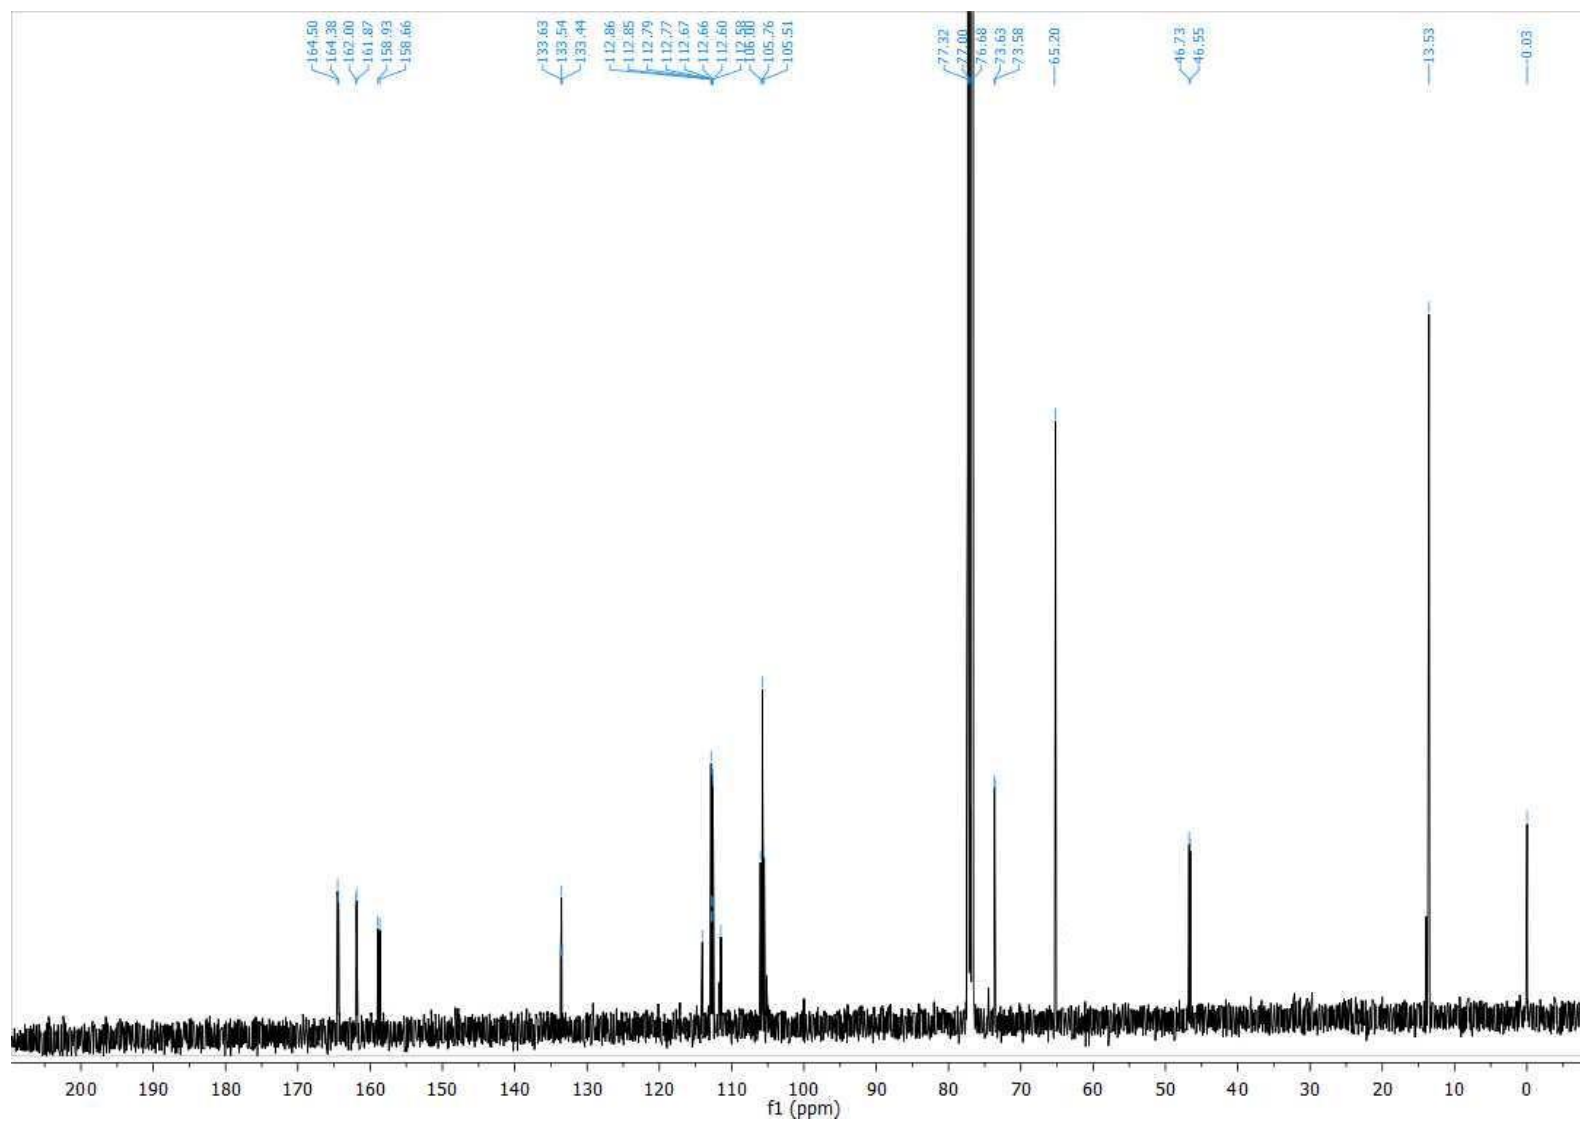

Diastereomeric mixture (3k)

7.446  
7.443  
7.439  
7.437  
7.433  
7.429  
7.274

6.465  
6.464  
6.424  
6.415  
6.414  
6.404  
6.403  
6.393  
6.388  
6.392  
6.368

5.181  
5.162  
5.154  
5.130  
5.118  
5.087  
5.071  
5.053  
5.024  
5.022  
4.987  
4.978  
4.976  
4.969  
4.960  
4.945  
4.863  
4.852  
4.818  
4.807  
4.465  
4.429  
4.397  
4.373  
4.349  
4.325  
4.301

1.899  
1.859  
1.817  
1.293  
1.269

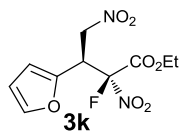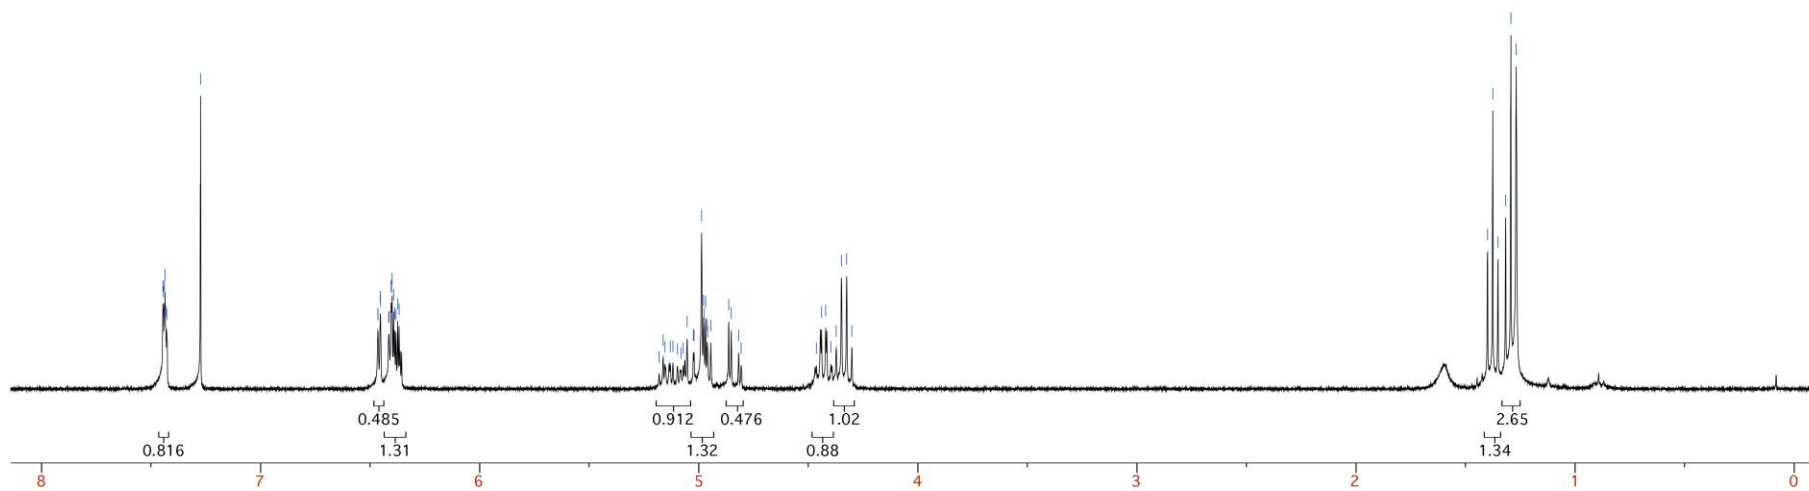



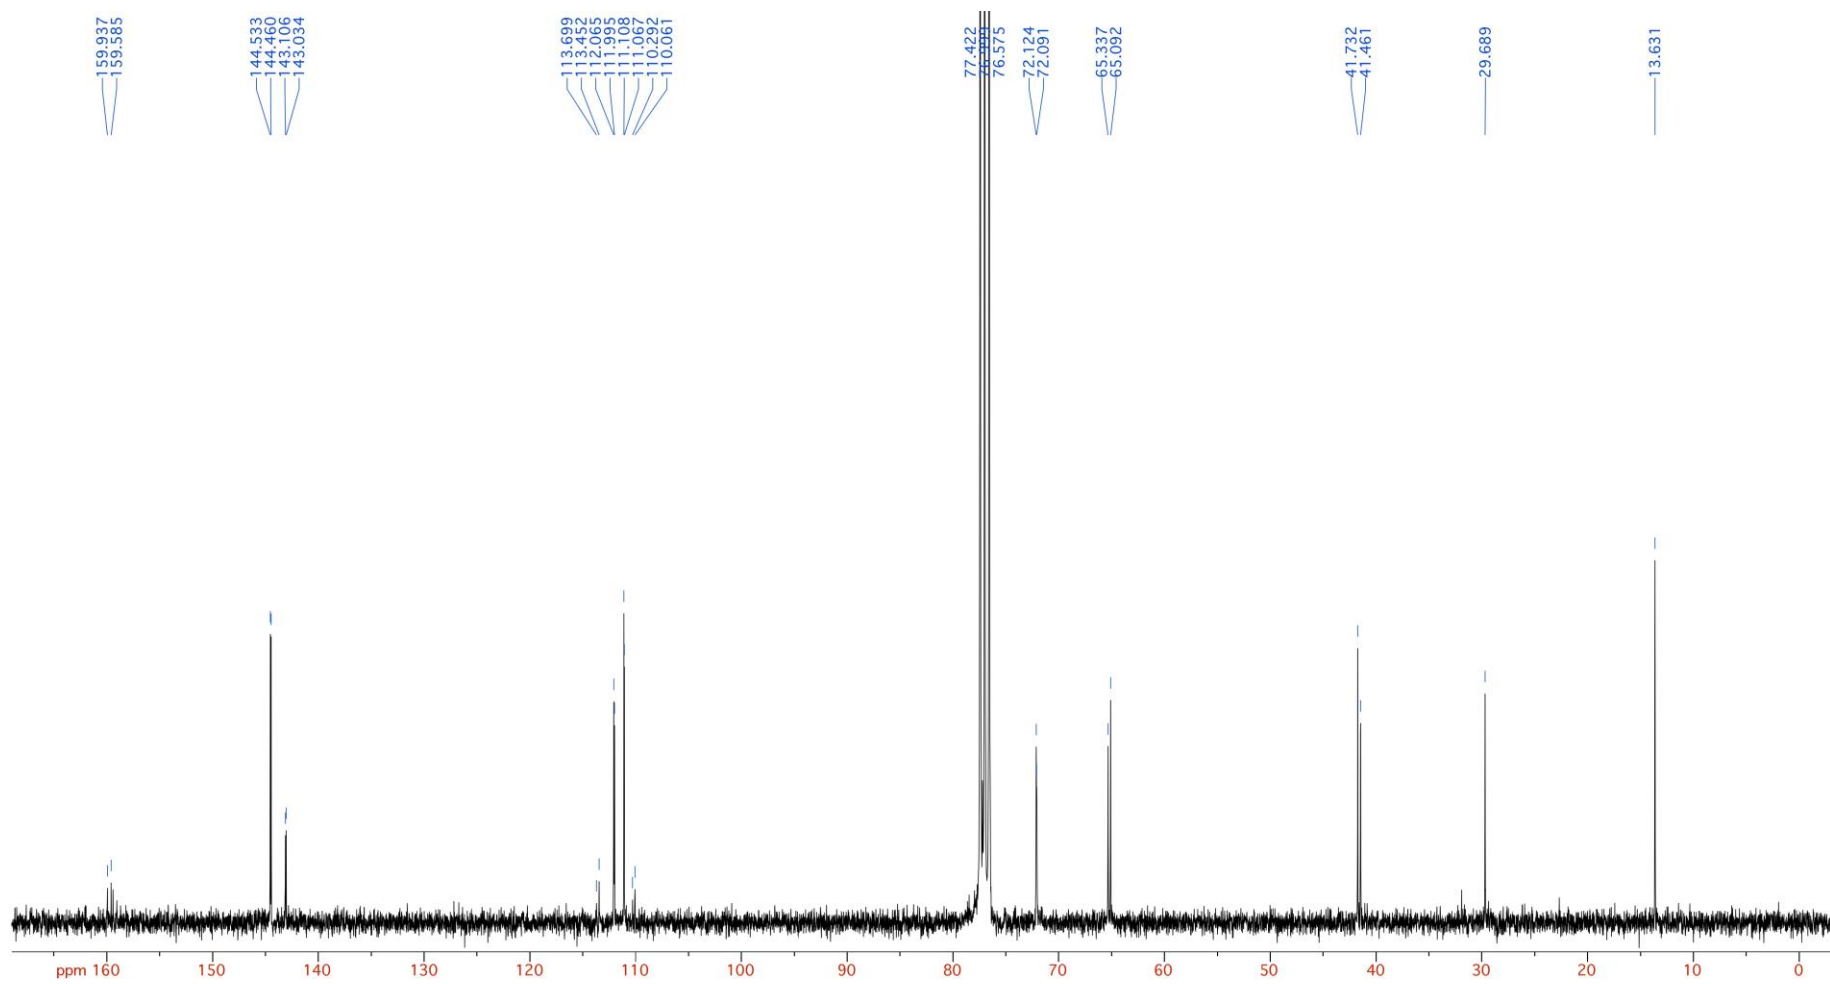

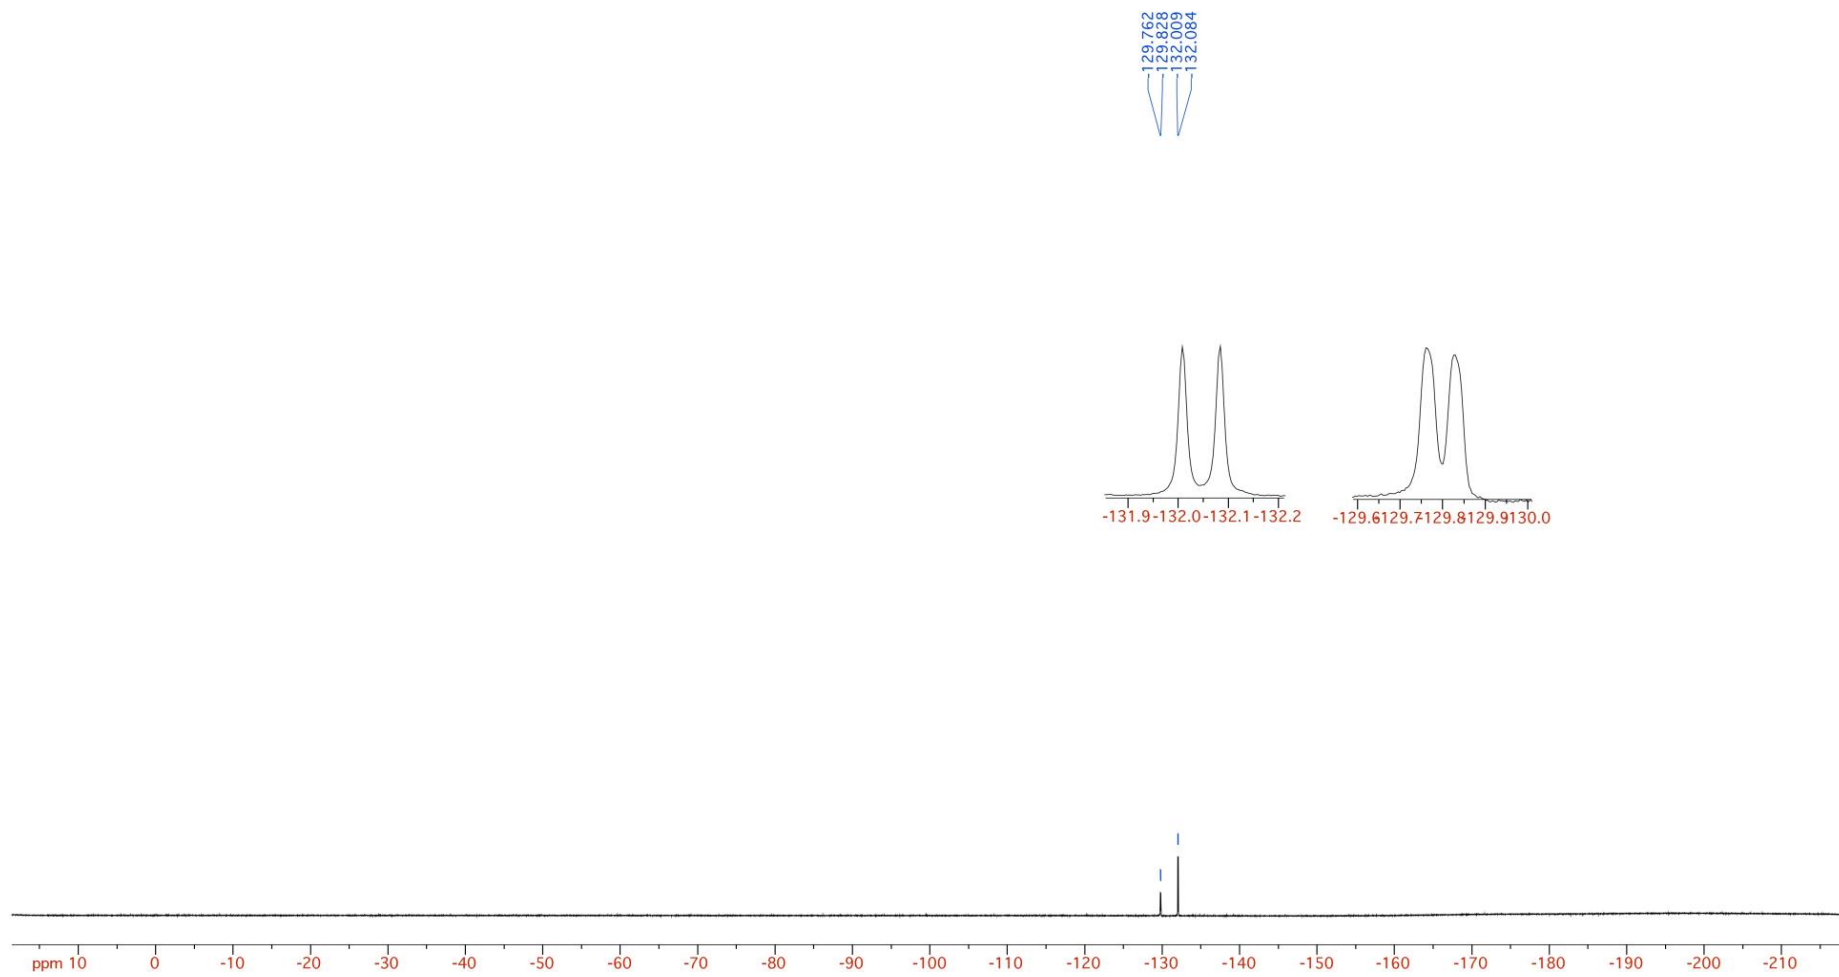

Major diastereomer (31)

7.317  
7.292  
7.265  
7.240  
7.215  
7.189  
7.164  
7.139

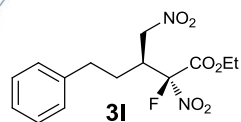

4.808  
4.796  
4.779  
4.760  
4.749  
4.737  
4.725  
4.713  
4.699  
4.687  
4.675  
4.663  
4.651  
4.639  
4.627  
4.615  
4.603  
4.591  
4.579  
4.567  
4.555  
4.543  
4.531  
4.519  
4.507  
4.495  
4.483  
4.471  
4.459  
4.447  
4.435  
4.423  
4.411  
4.399  
4.387  
4.375  
4.363  
4.351  
4.339  
4.327  
4.315  
4.303  
4.291  
4.279  
4.267  
4.255  
4.243  
4.231  
4.219  
4.207  
4.195  
4.183  
4.171  
4.159  
4.147  
4.135  
4.123  
4.111  
4.099  
4.087  
4.075  
4.063  
4.051  
4.039  
4.027  
4.015  
4.003  
3.991  
3.979  
3.967  
3.955  
3.943  
3.931  
3.919  
3.907  
3.895  
3.883  
3.871  
3.859  
3.847  
3.835  
3.823  
3.811  
3.799  
3.787  
3.775  
3.763  
3.751  
3.739  
3.727  
3.715  
3.703  
3.691  
3.679  
3.667  
3.655  
3.643  
3.631  
3.619  
3.607  
3.595  
3.583  
3.571  
3.559  
3.547  
3.535  
3.523  
3.511  
3.499  
3.487  
3.475  
3.463  
3.451  
3.439  
3.427  
3.415  
3.403  
3.391  
3.379  
3.367  
3.355  
3.343  
3.331  
3.319  
3.307  
3.295  
3.283  
3.271  
3.259  
3.247  
3.235  
3.223  
3.211  
3.199  
3.187  
3.175  
3.163  
3.151  
3.139  
3.127  
3.115  
3.103  
3.091  
3.079  
3.067  
3.055  
3.043  
3.031  
3.019  
3.007  
2.995  
2.983  
2.971  
2.959  
2.947  
2.935  
2.923  
2.911  
2.899  
2.887  
2.875  
2.863  
2.851  
2.839  
2.827  
2.815  
2.803  
2.791  
2.779  
2.767  
2.755  
2.743  
2.731  
2.719  
2.707  
2.695  
2.683  
2.671  
2.659  
2.647  
2.635  
2.623  
2.611  
2.599  
2.587  
2.575  
2.563  
2.551  
2.539  
2.527  
2.515  
2.503  
2.491  
2.479  
2.467  
2.455  
2.443  
2.431  
2.419  
2.407  
2.395  
2.383  
2.371  
2.359  
2.347  
2.335  
2.323  
2.311  
2.299  
2.287  
2.275  
2.263  
2.251  
2.239  
2.227  
2.215  
2.203  
2.191  
2.179  
2.167  
2.155  
2.143  
2.131  
2.119  
2.107  
2.095  
2.083  
2.071  
2.059  
2.047  
2.035  
2.023  
2.011  
2.000  
1.988  
1.976  
1.964  
1.952  
1.940  
1.928  
1.916  
1.904  
1.892  
1.880  
1.868  
1.856  
1.844  
1.832  
1.820  
1.808  
1.796  
1.784  
1.772  
1.760  
1.748  
1.736  
1.724  
1.712  
1.700  
1.688  
1.676  
1.664  
1.652  
1.640  
1.628  
1.616  
1.604  
1.592  
1.580  
1.568  
1.556  
1.544  
1.532  
1.520  
1.508  
1.496  
1.484  
1.472  
1.460  
1.448  
1.436  
1.424  
1.412  
1.400  
1.388  
1.376  
1.364  
1.352  
1.340  
1.328  
1.316  
1.304  
1.292  
1.280  
1.268  
1.256  
1.244  
1.232  
1.220  
1.208  
1.196  
1.184  
1.172  
1.160  
1.148  
1.136  
1.124  
1.112  
1.100  
1.088  
1.076  
1.064  
1.052  
1.040  
1.028  
1.016  
1.004  
0.992  
0.980  
0.968  
0.956  
0.944  
0.932  
0.920  
0.908  
0.896  
0.884  
0.872  
0.860  
0.848  
0.836  
0.824  
0.812  
0.800  
0.788  
0.776  
0.764  
0.752  
0.740  
0.728  
0.716  
0.704  
0.692  
0.680  
0.668  
0.656  
0.644  
0.632  
0.620  
0.608  
0.596  
0.584  
0.572  
0.560  
0.548  
0.536  
0.524  
0.512  
0.500  
0.488  
0.476  
0.464  
0.452  
0.440  
0.428  
0.416  
0.404  
0.392  
0.380  
0.368  
0.356  
0.344  
0.332  
0.320  
0.308  
0.296  
0.284  
0.272  
0.260  
0.248  
0.236  
0.224  
0.212  
0.200  
0.188  
0.176  
0.164  
0.152  
0.140  
0.128  
0.116  
0.104  
0.092  
0.080  
0.068  
0.056  
0.044  
0.032  
0.020  
0.008  
0.000

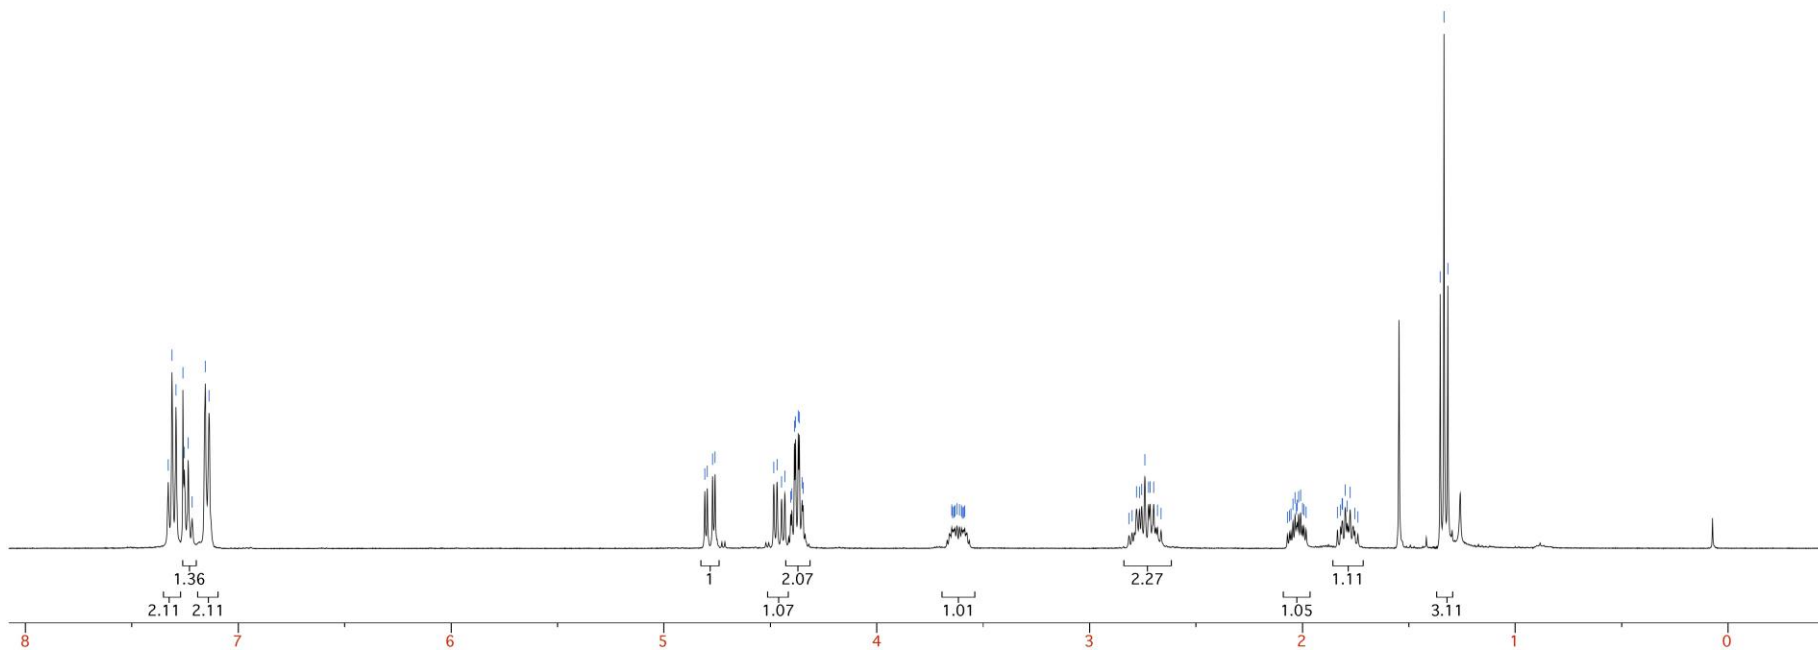

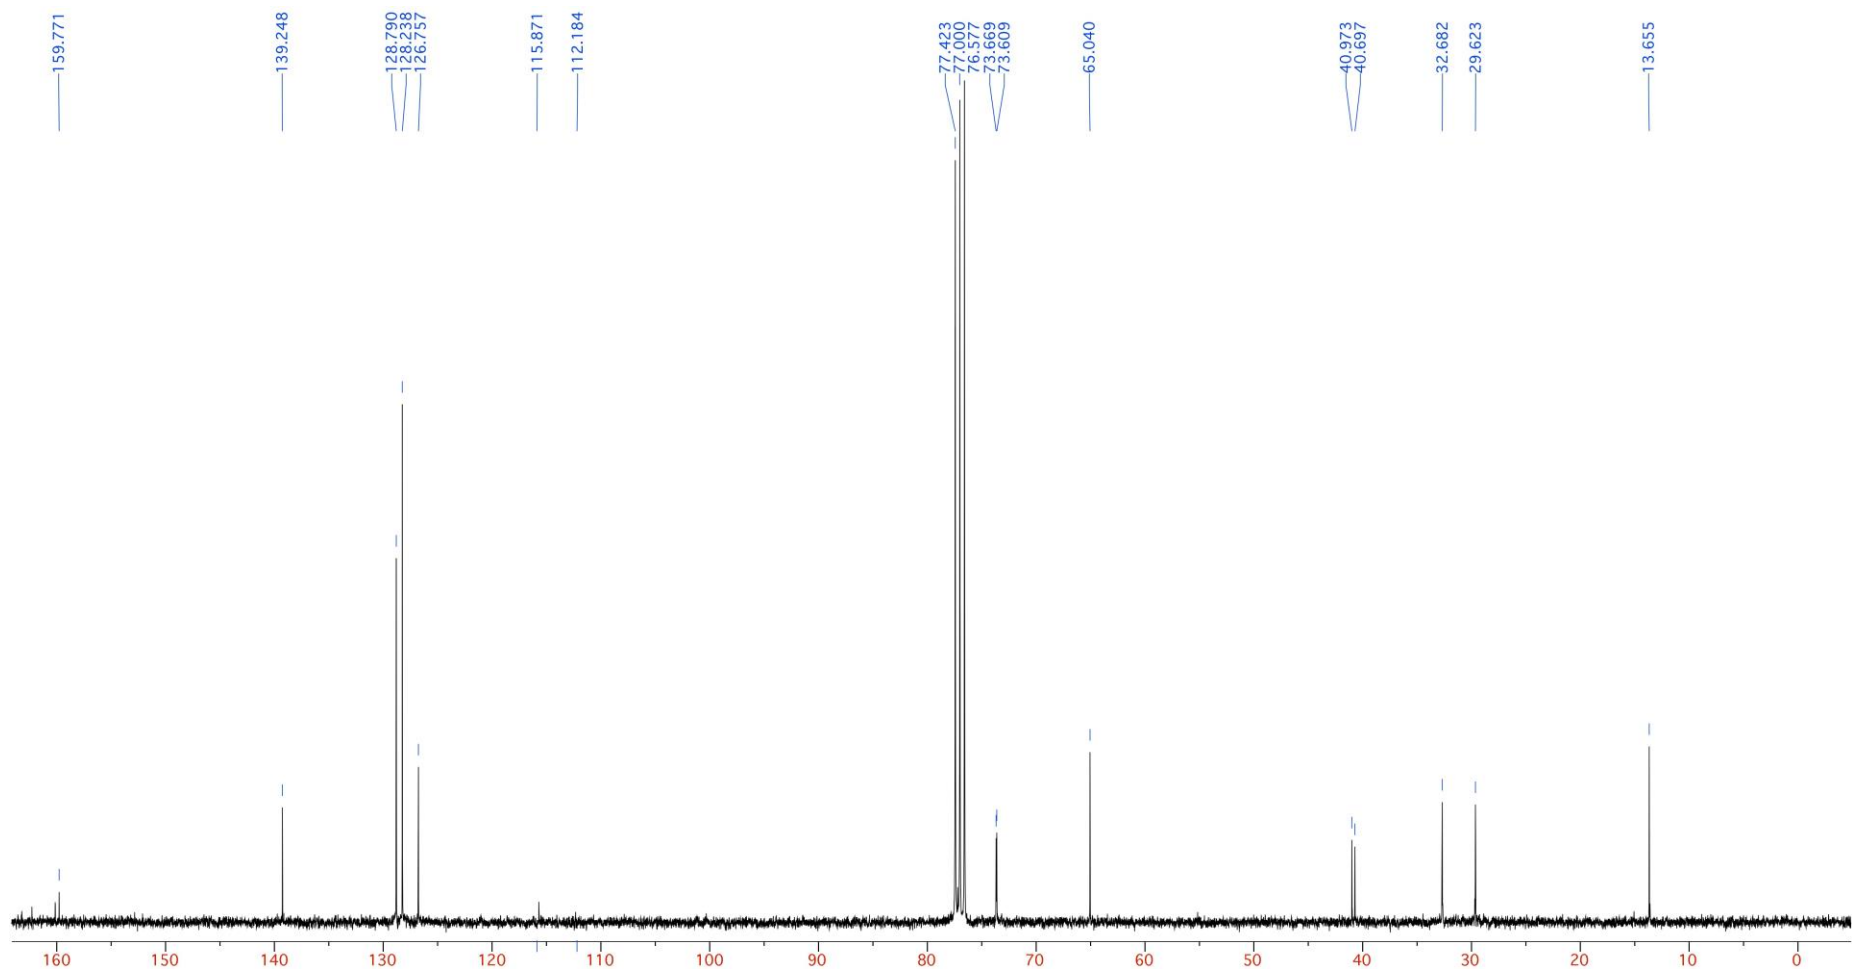

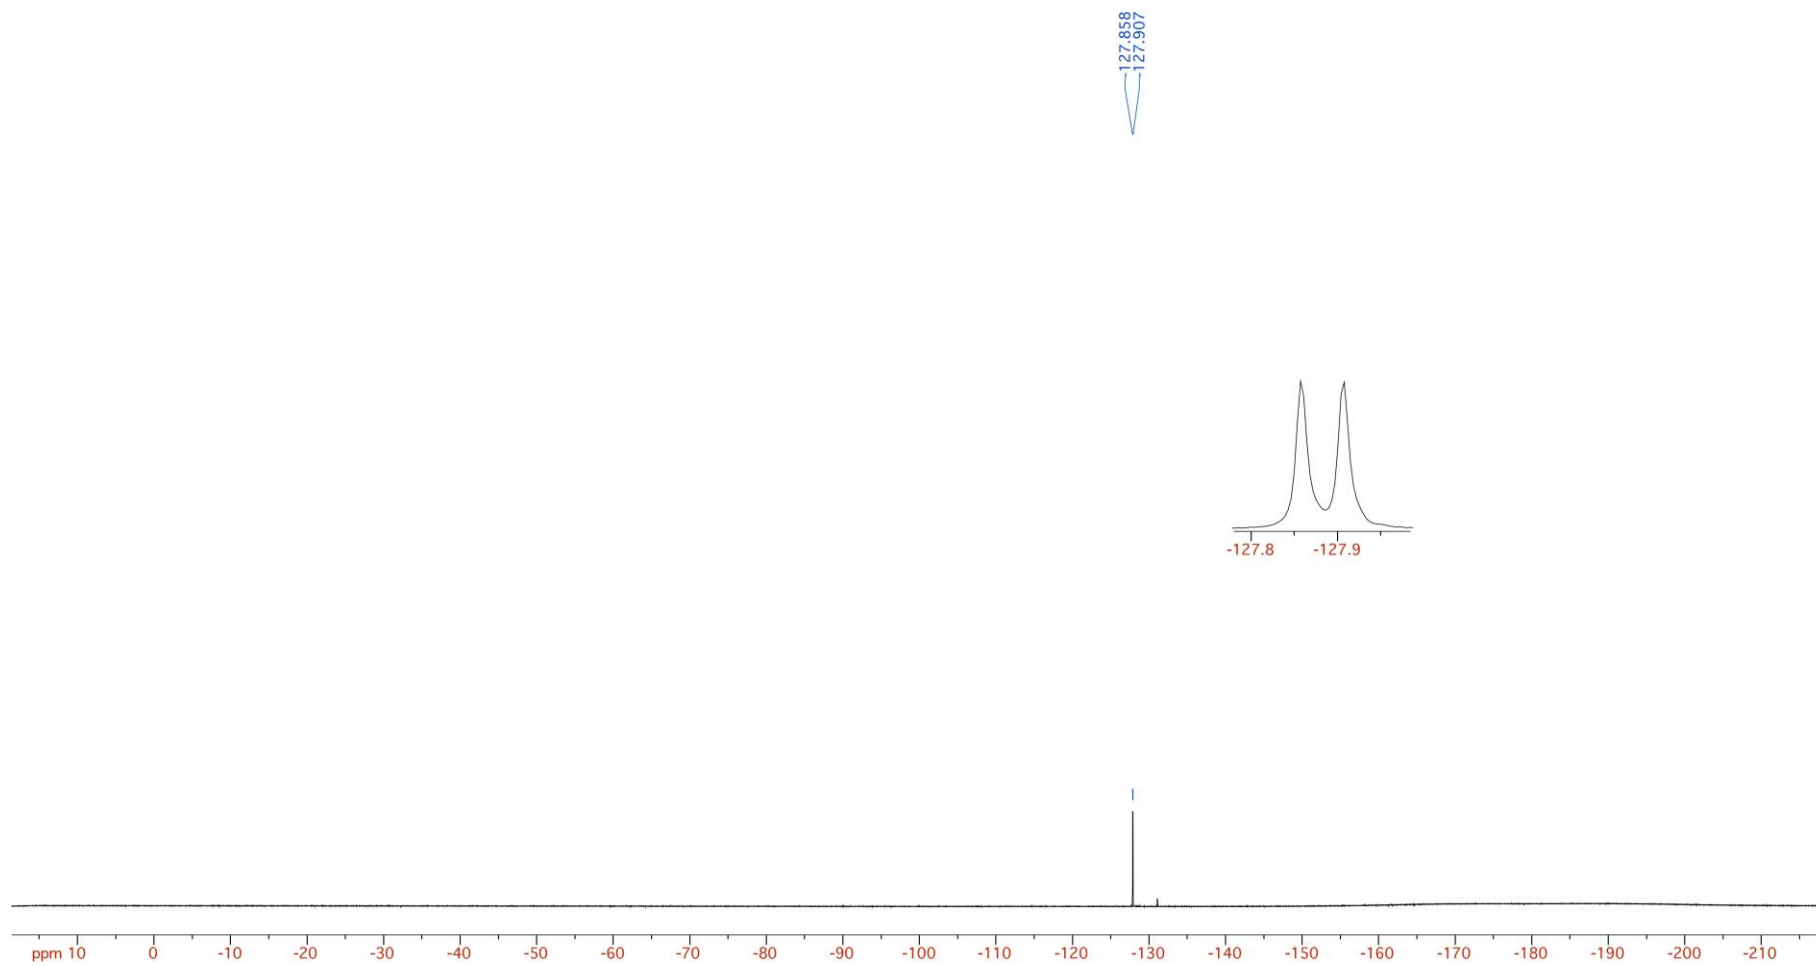

Minor diastereomer (31')

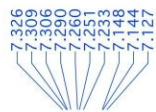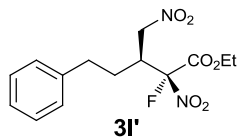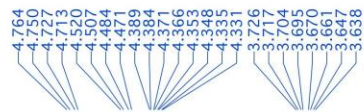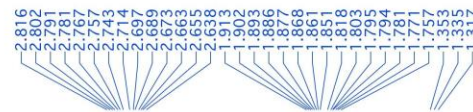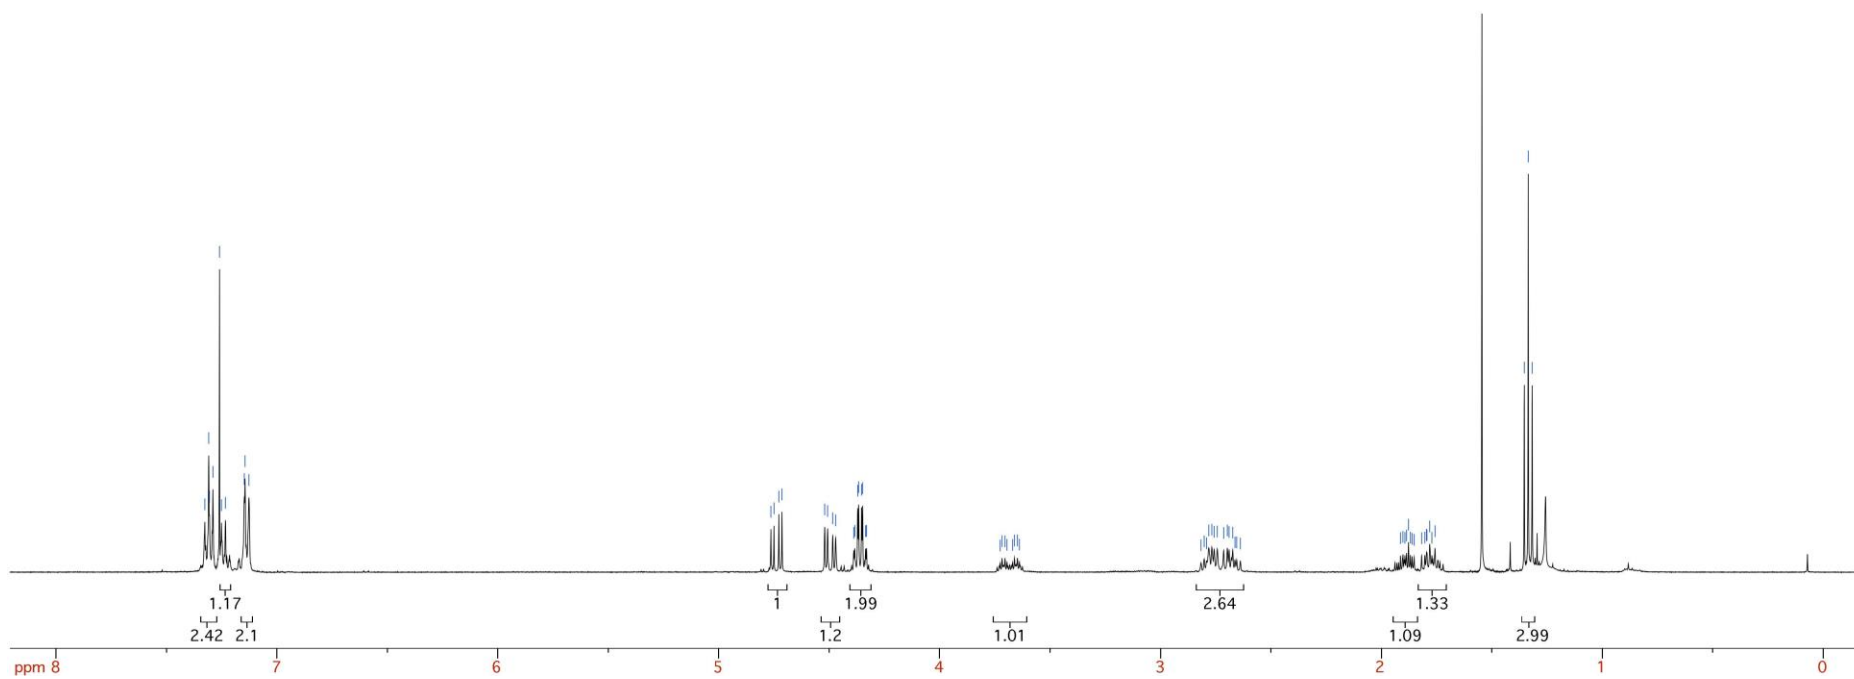

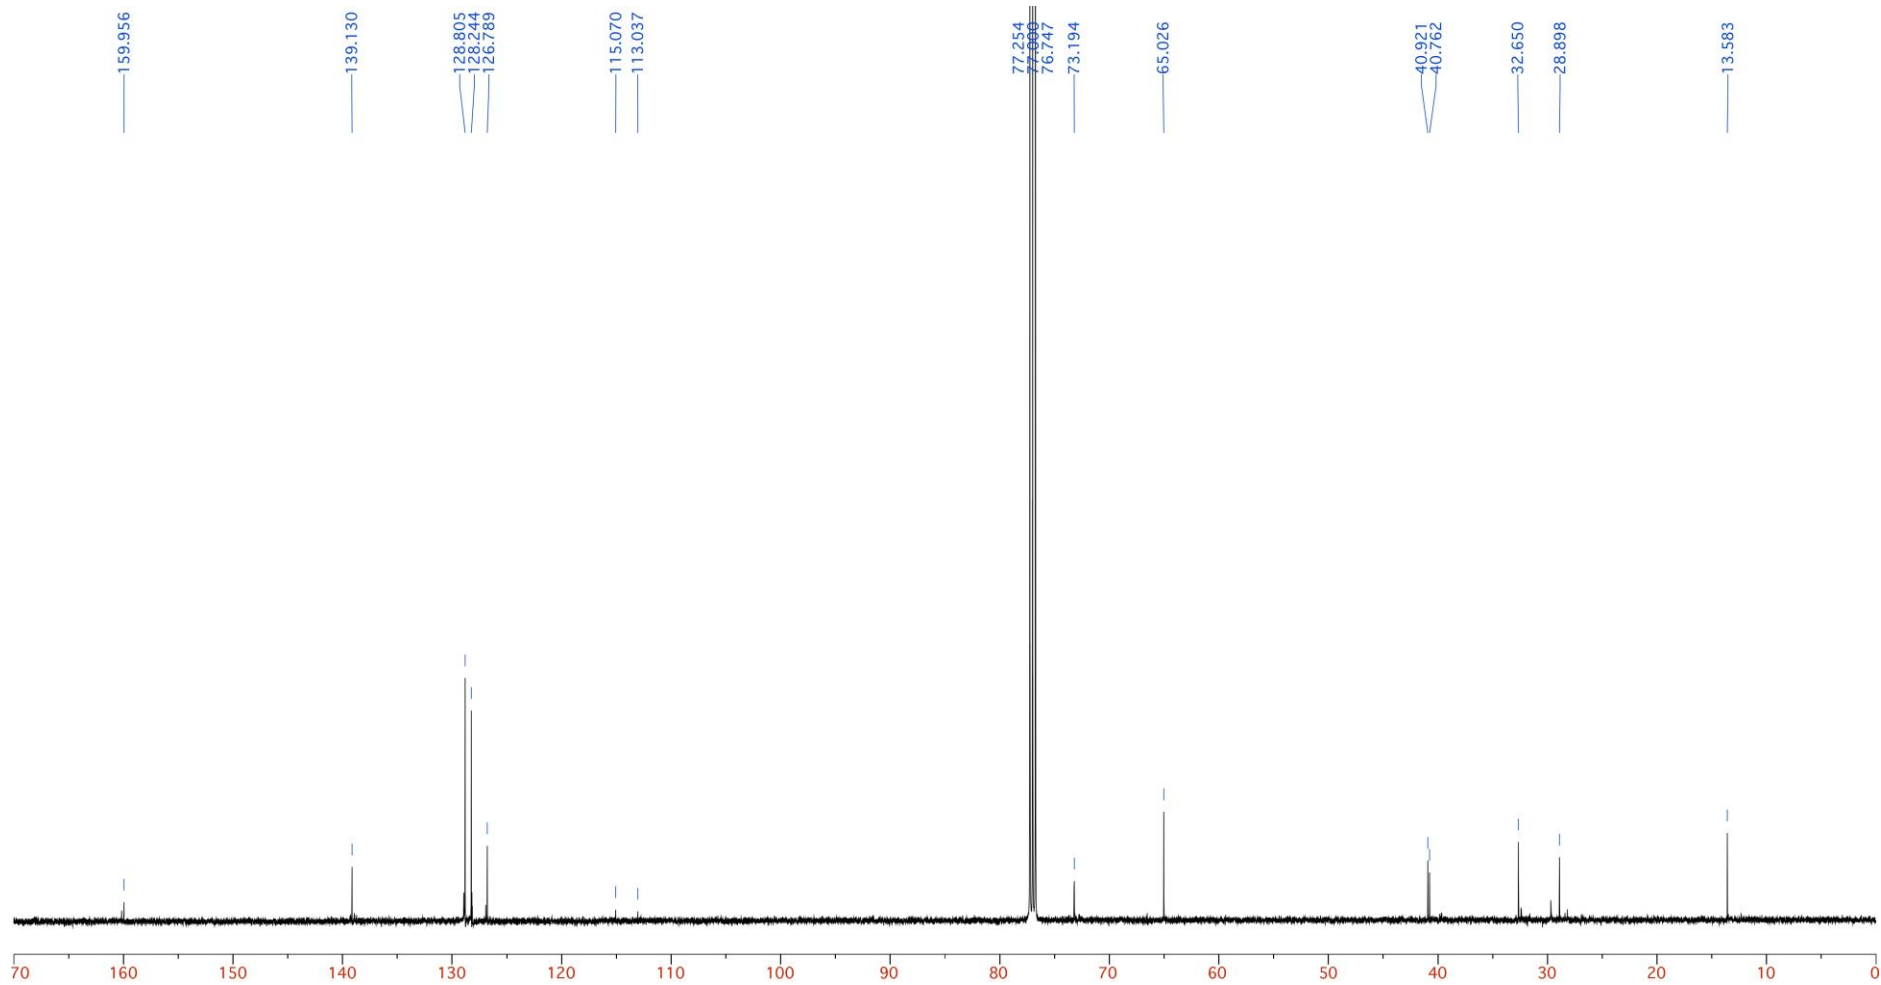

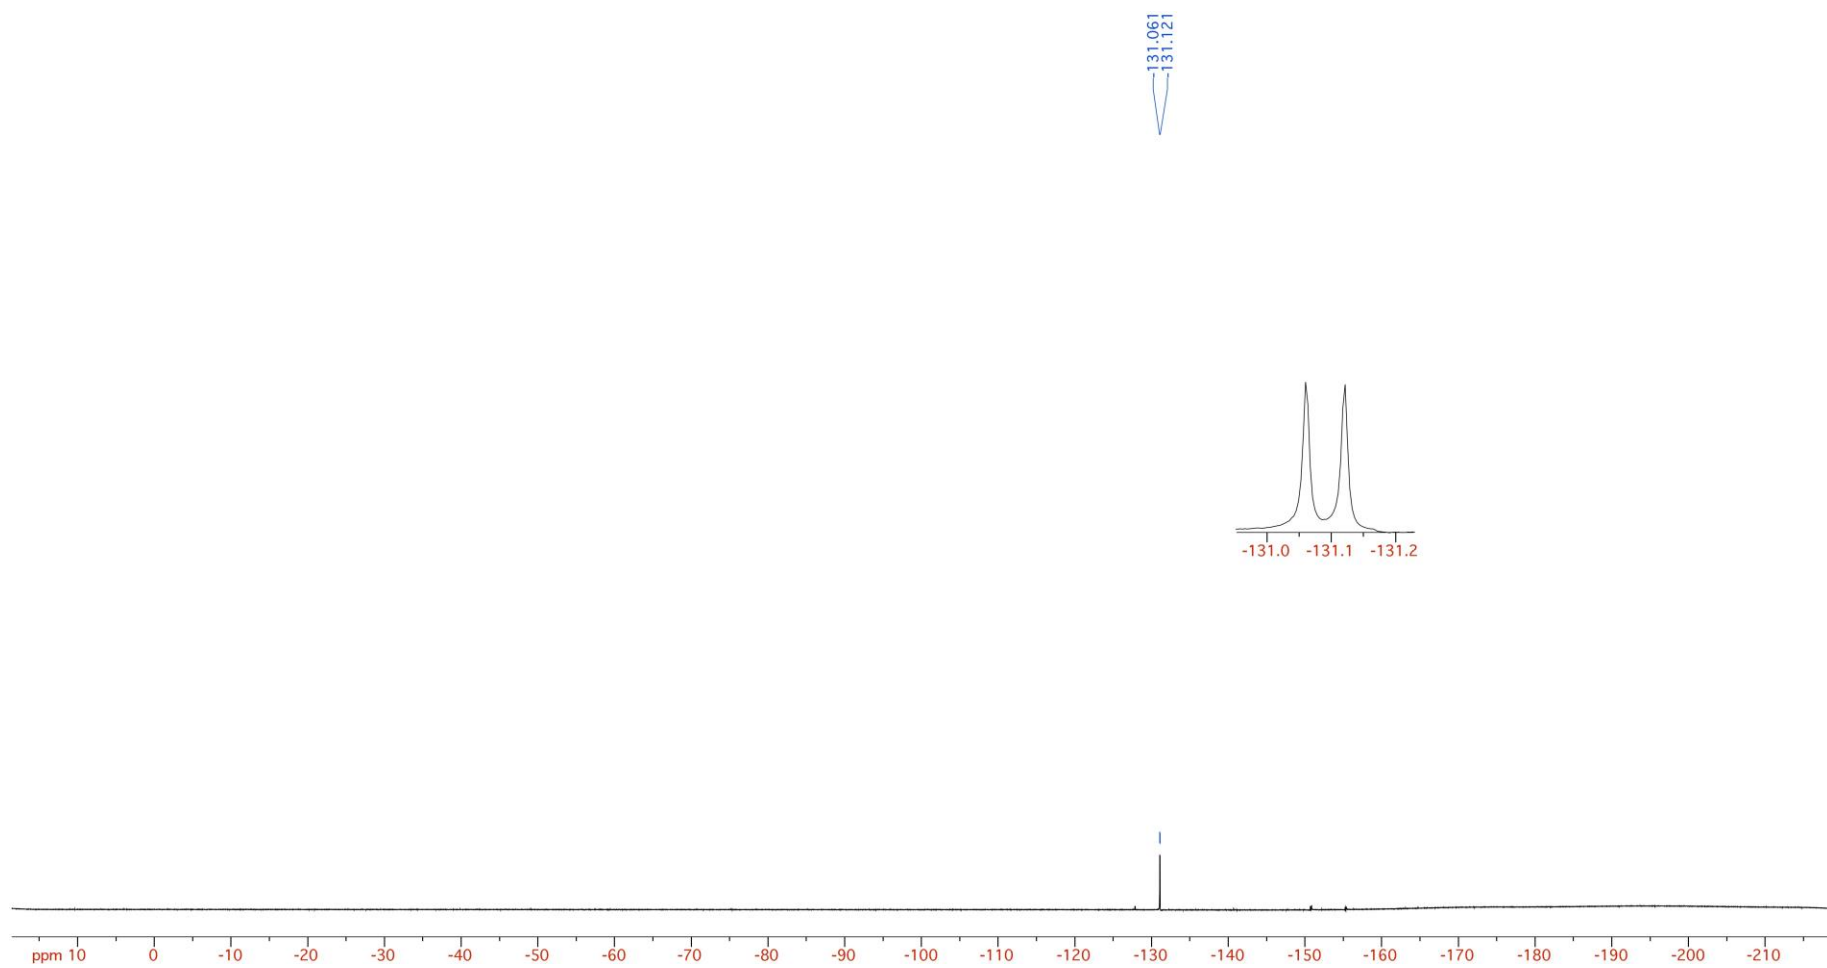



Diastereomeric mixture (3m)

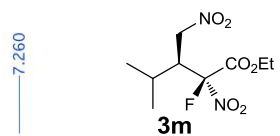

4.644  
4.639  
4.606  
4.591  
4.567  
4.556  
4.513  
4.505  
4.495  
4.472  
4.462  
4.452  
4.414  
4.396  
4.378  
4.361  
4.343  
4.325  
4.290  
4.280  
4.219

2.180  
2.172  
2.155  
2.145  
2.137  
1.986  
1.975  
1.969  
1.958  
1.951  
1.557  
1.380  
1.362  
1.344  
1.326  
1.079  
1.062  
0.952  
0.948  
0.935  
0.931

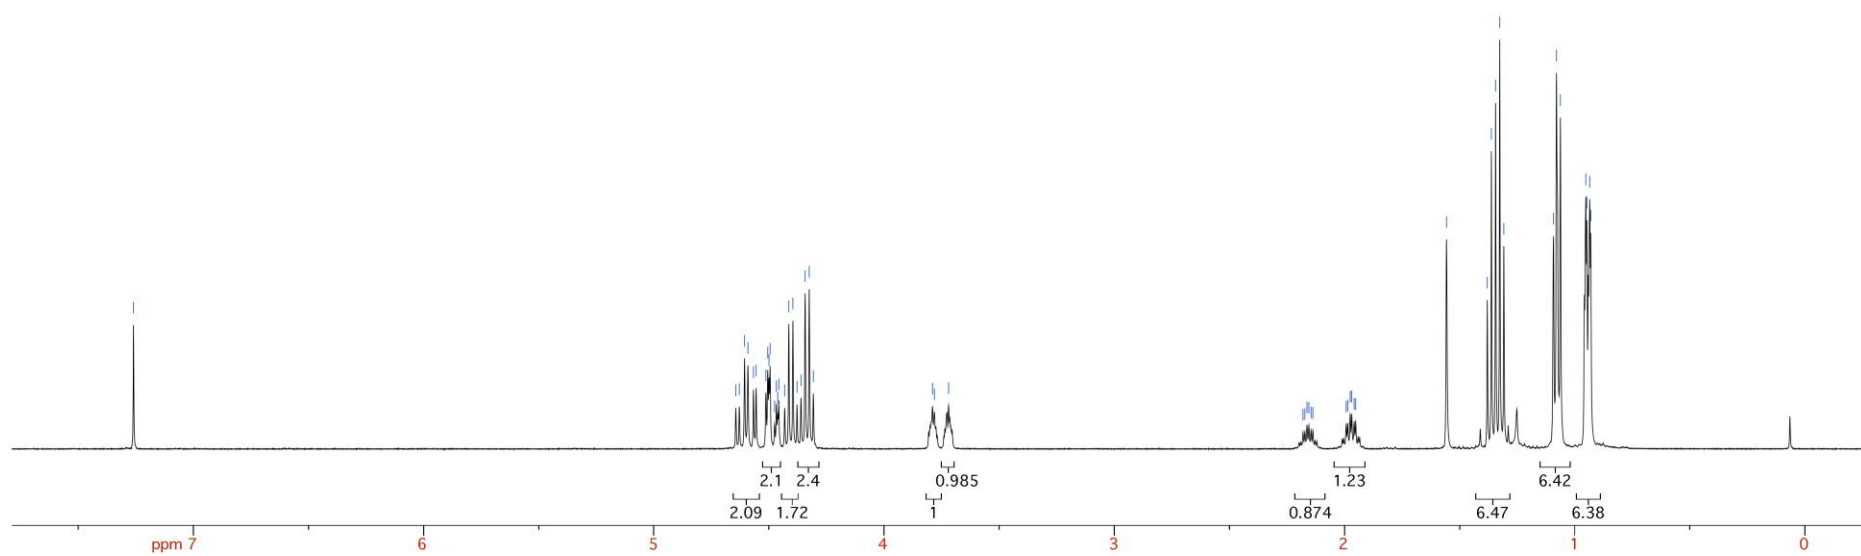

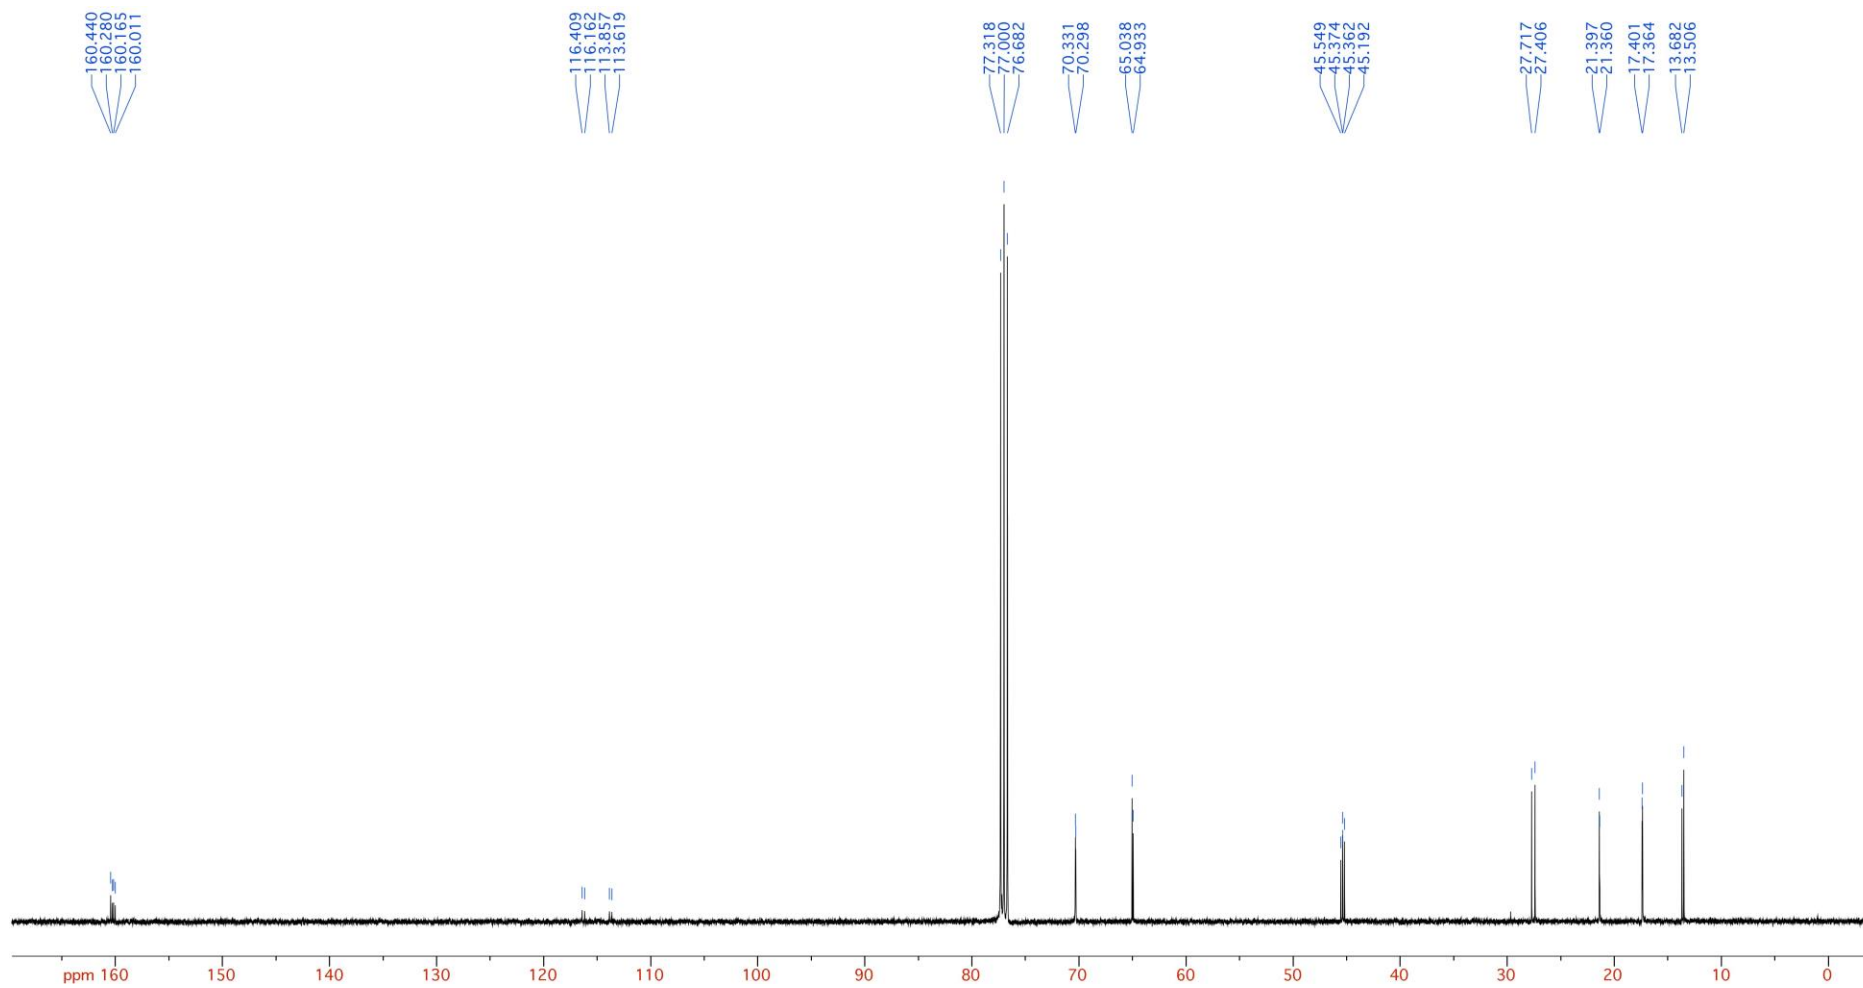

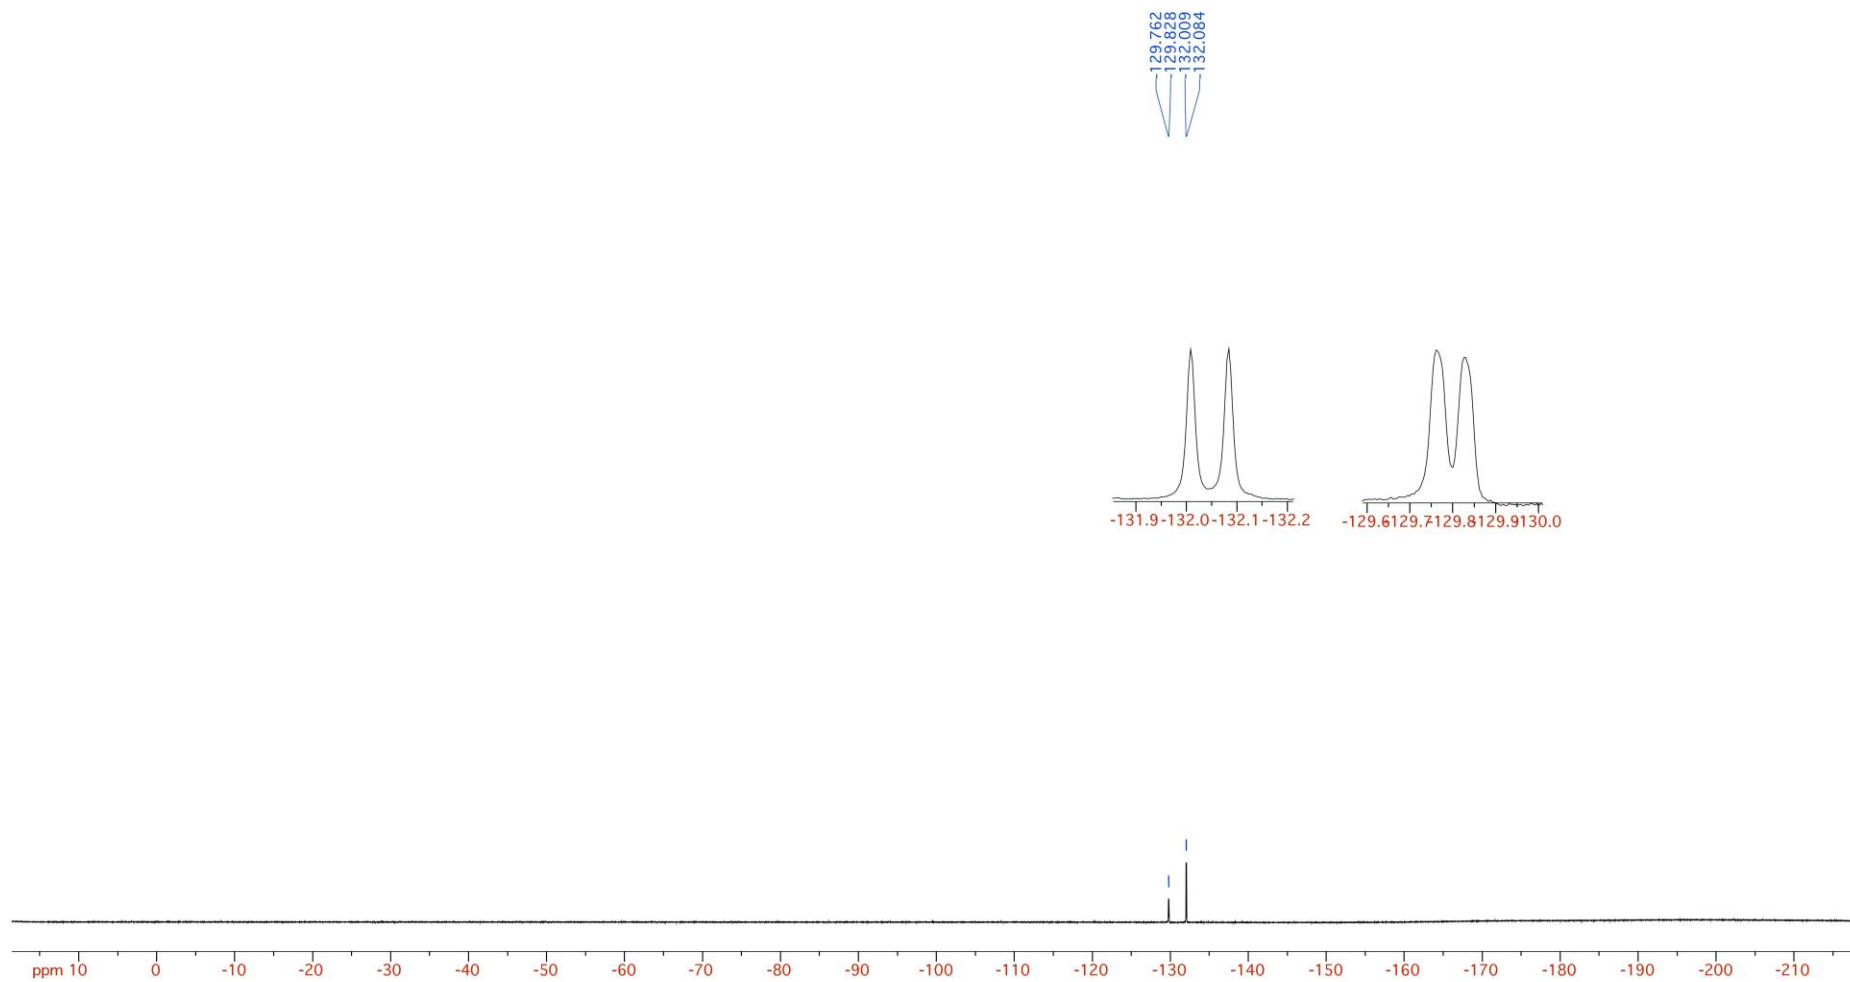

## E. NMR Spectra of the Derivatives and Mannich Addition Product

### Ethyl 2,4-bis((tert-butoxycarbonyl)amino)-3-phenylbutanoate (7)

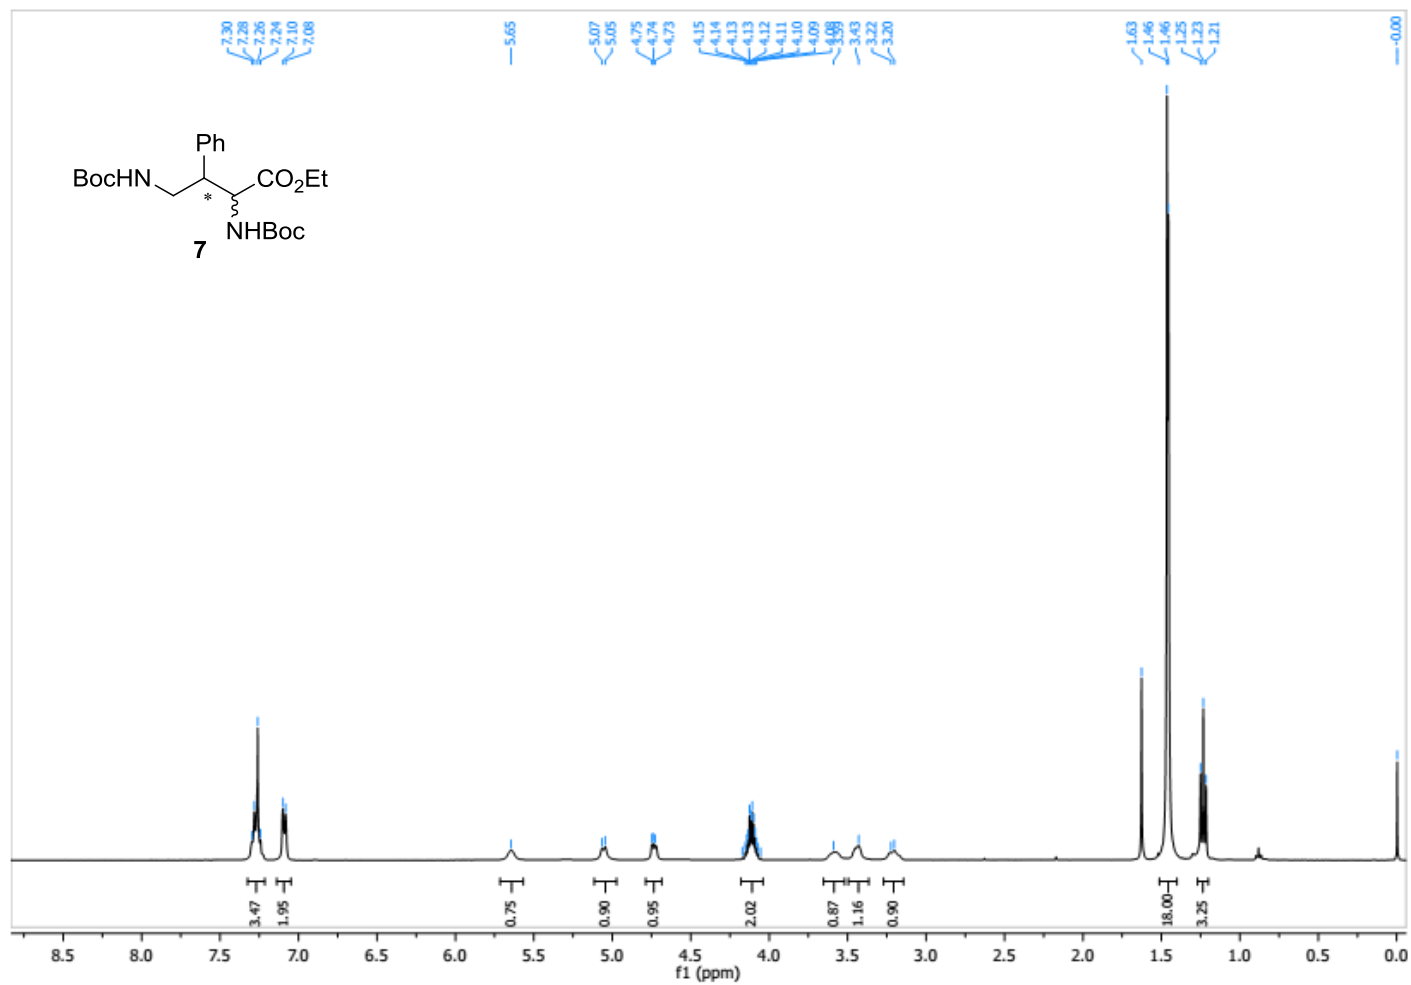

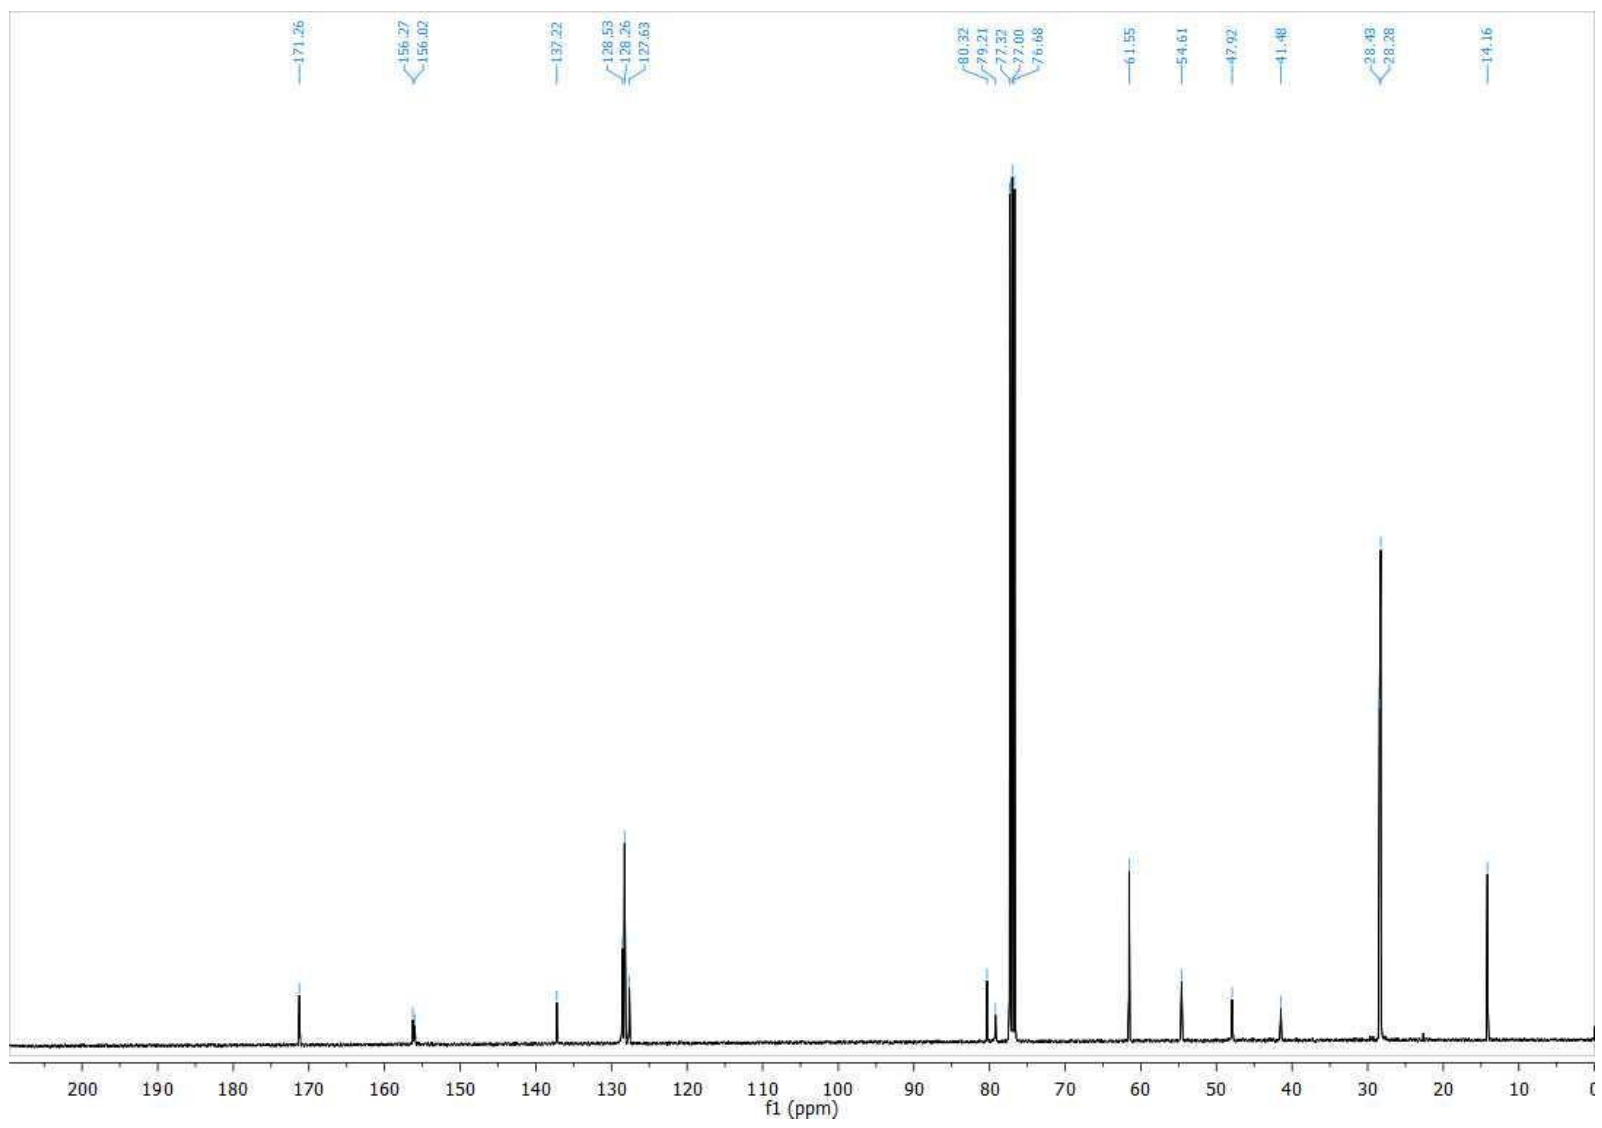

(S)-Ethyl 2-((tert-butoxycarbonyl)imino)-4-nitro-3-phenylbutanoate (**8**)

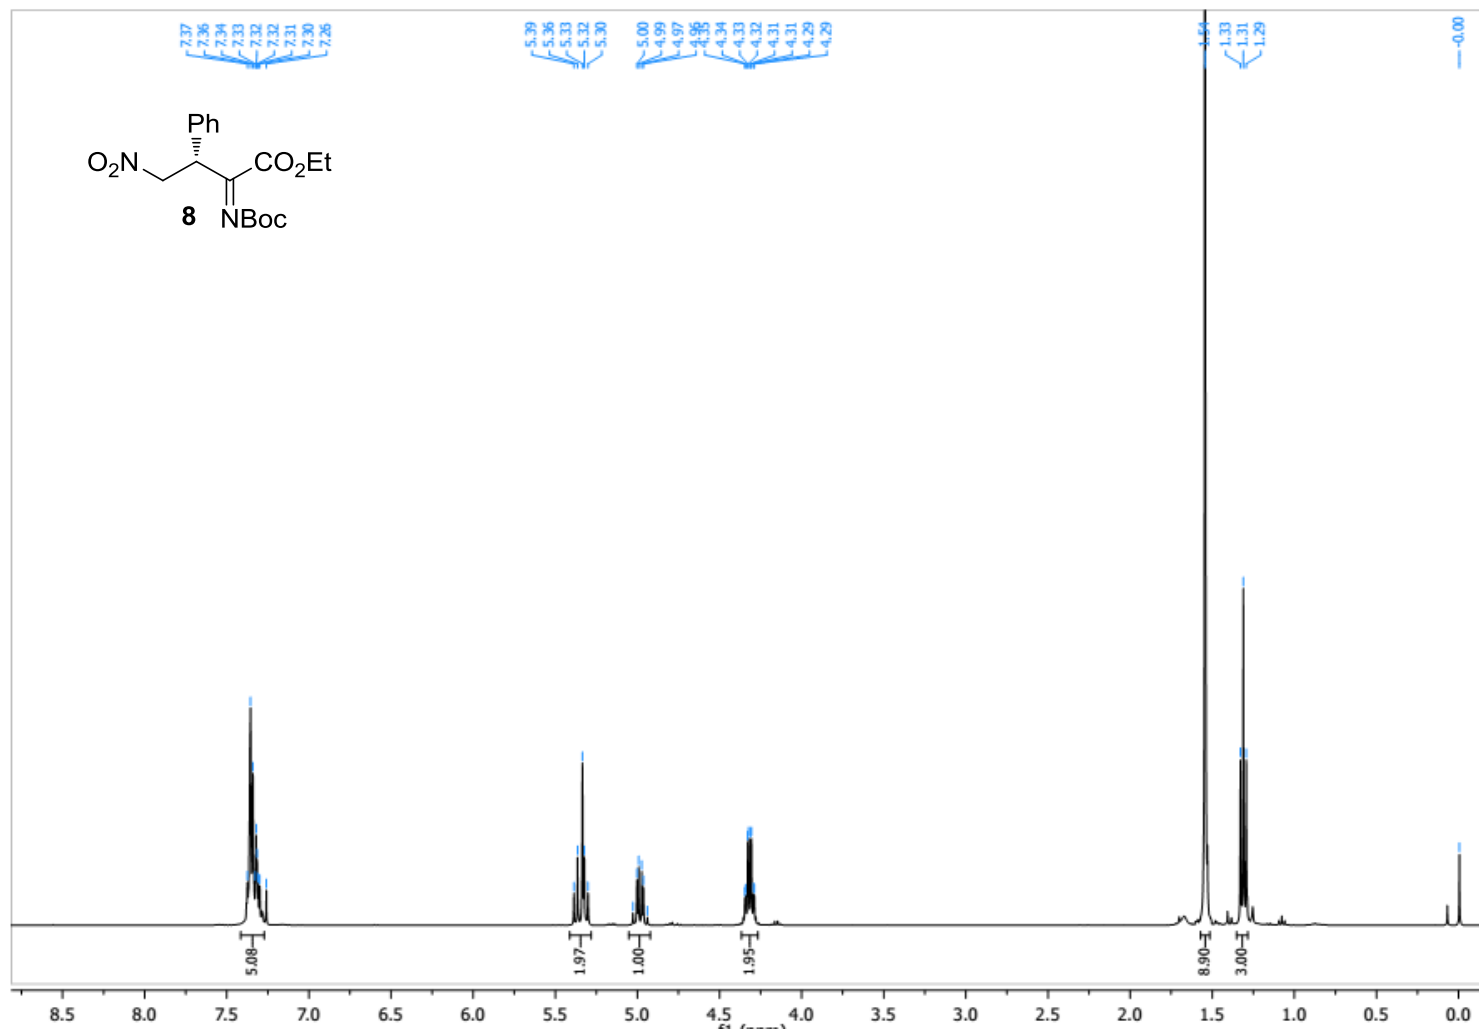

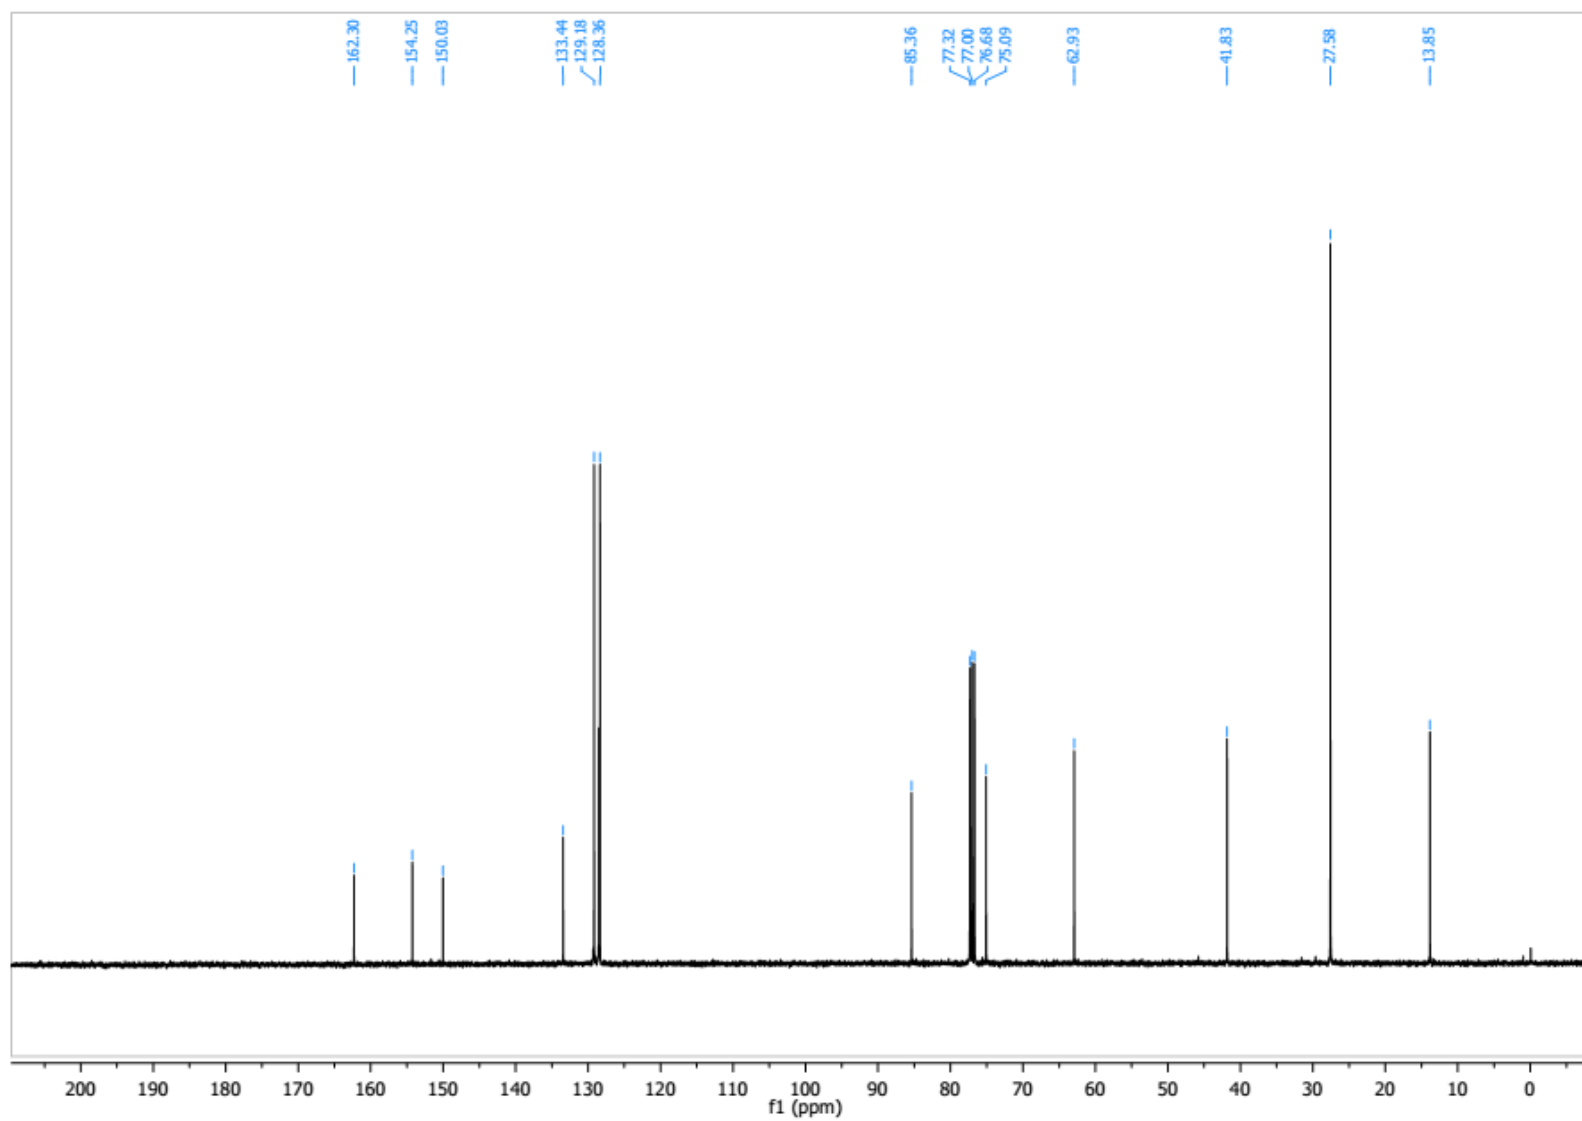

**(2S,3S)-Ethyl 2-((tert-butoxycarbonyl)amino)-2-fluoro-4-nitro-3-phenylbutanoate (9)**

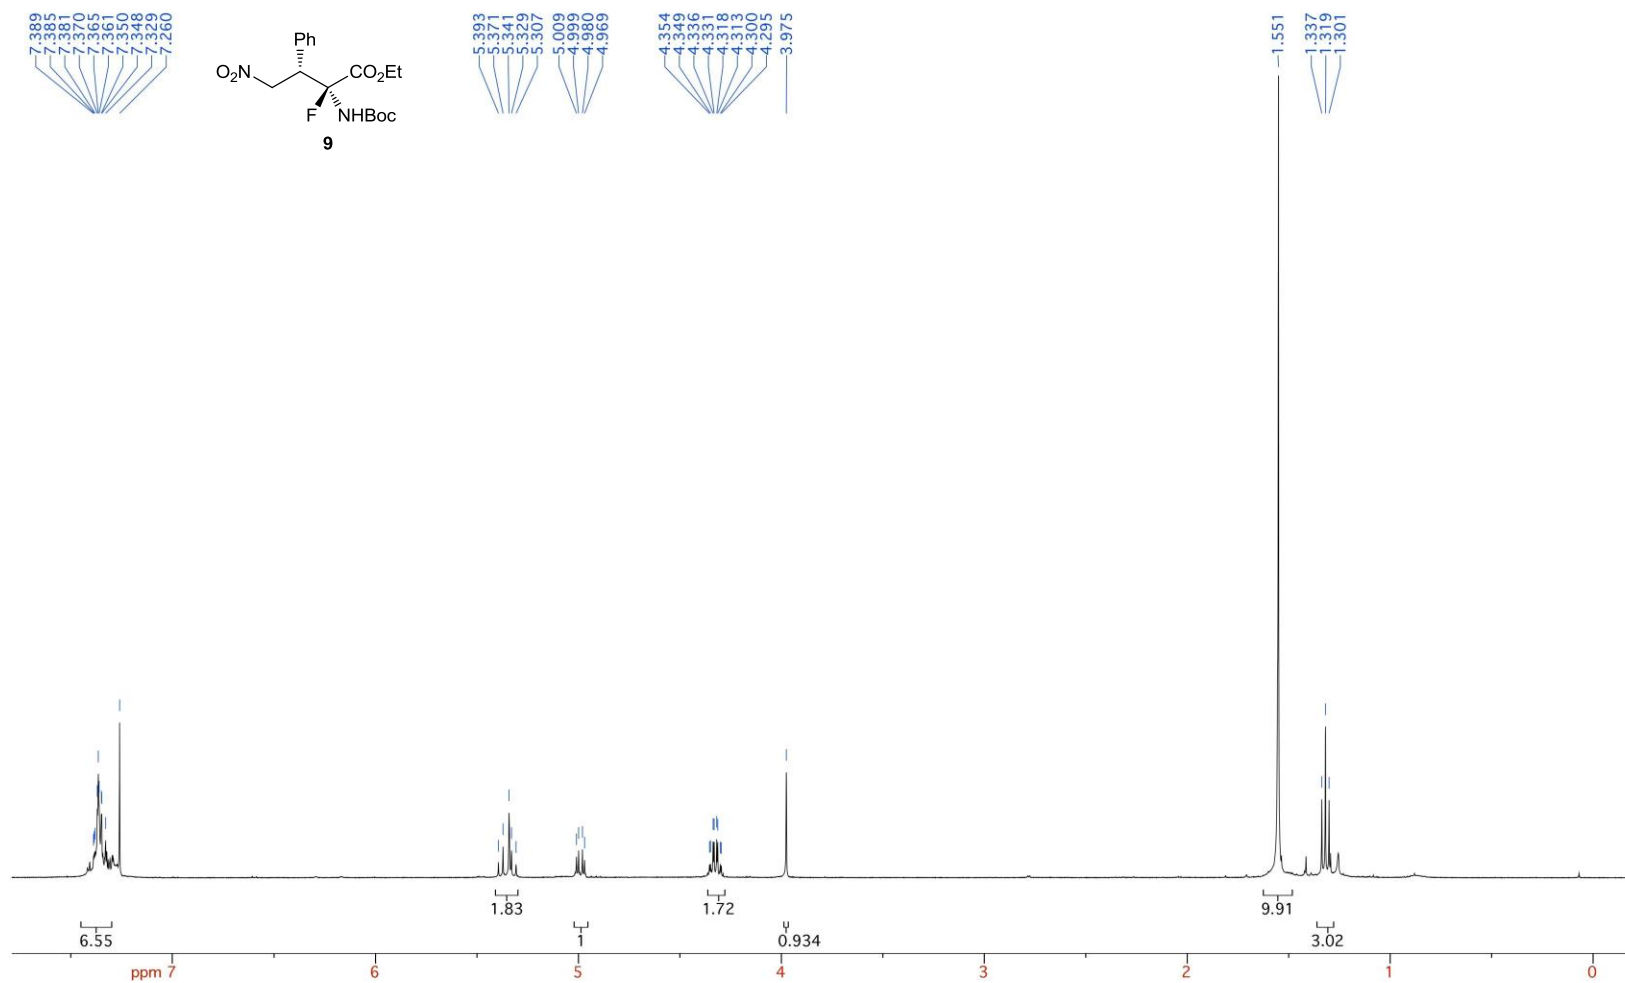



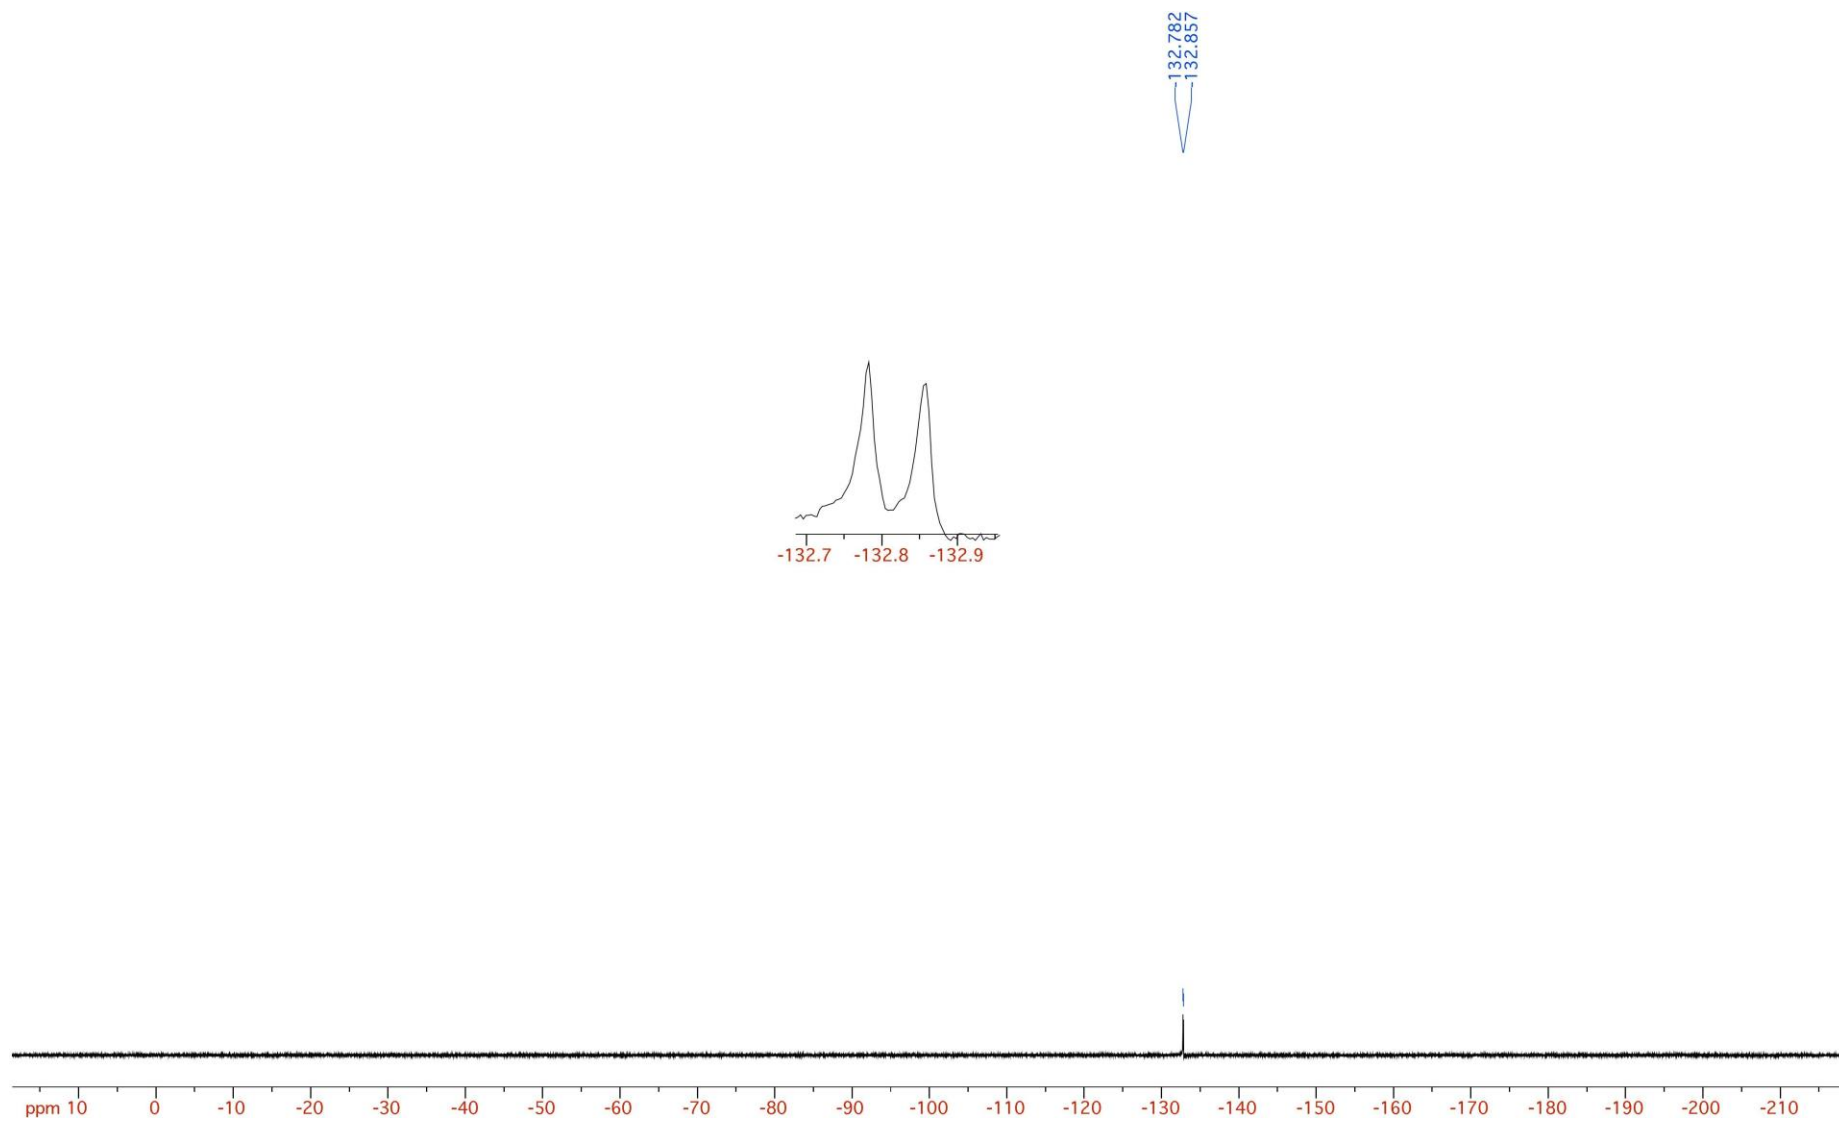

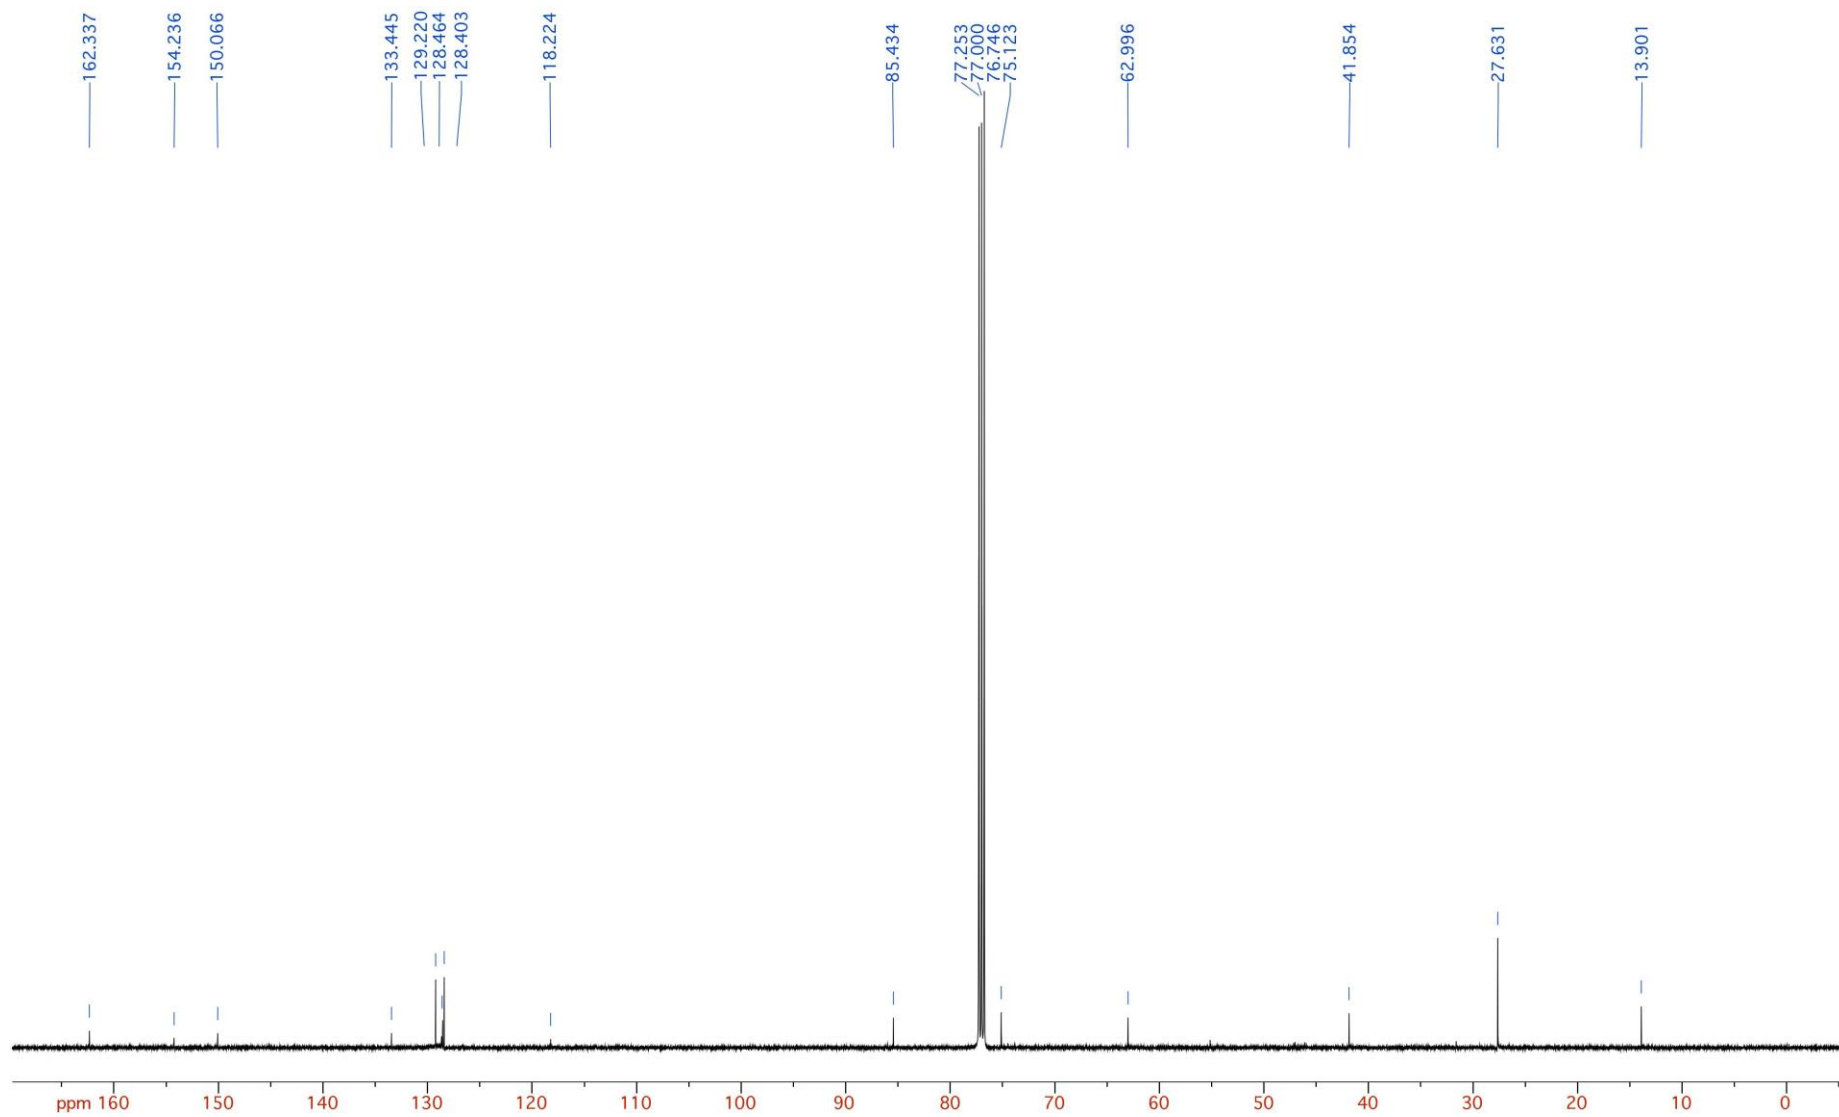

**((2S)-1-fluoro-1,3-dinitropropan-2-yl)benzene (10, pure major diastereomer)**

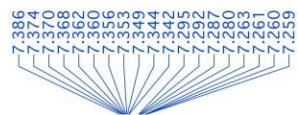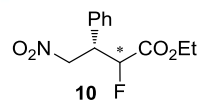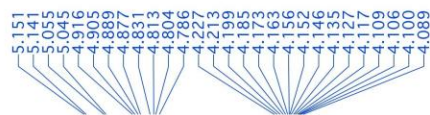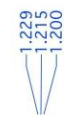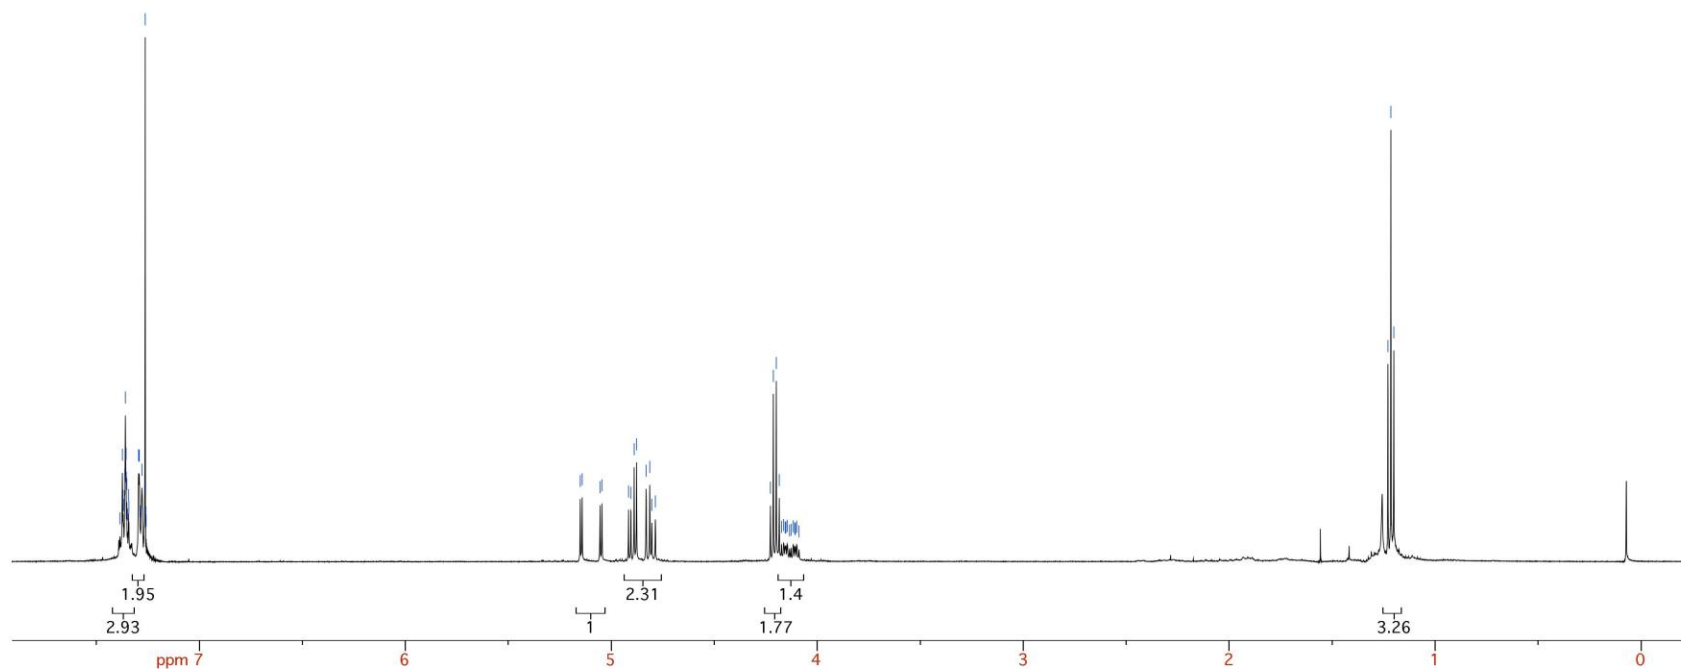

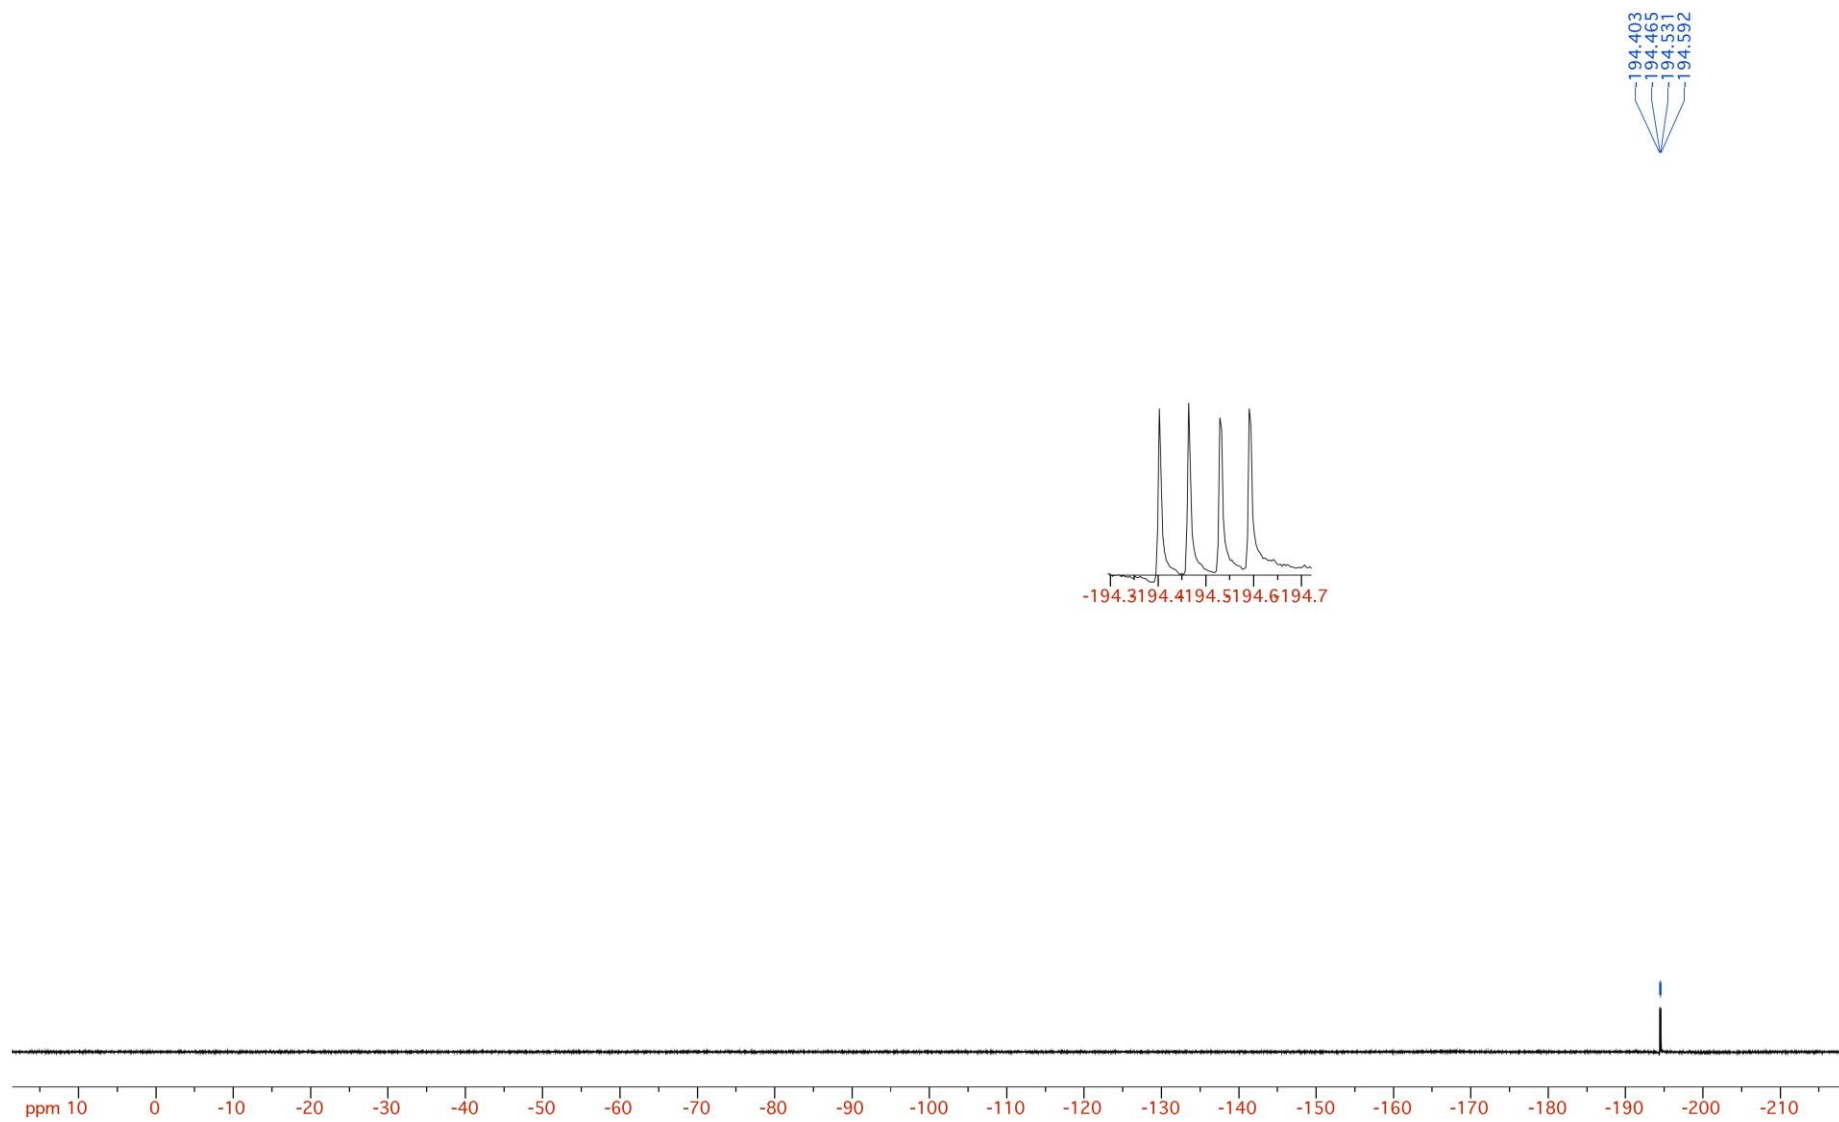

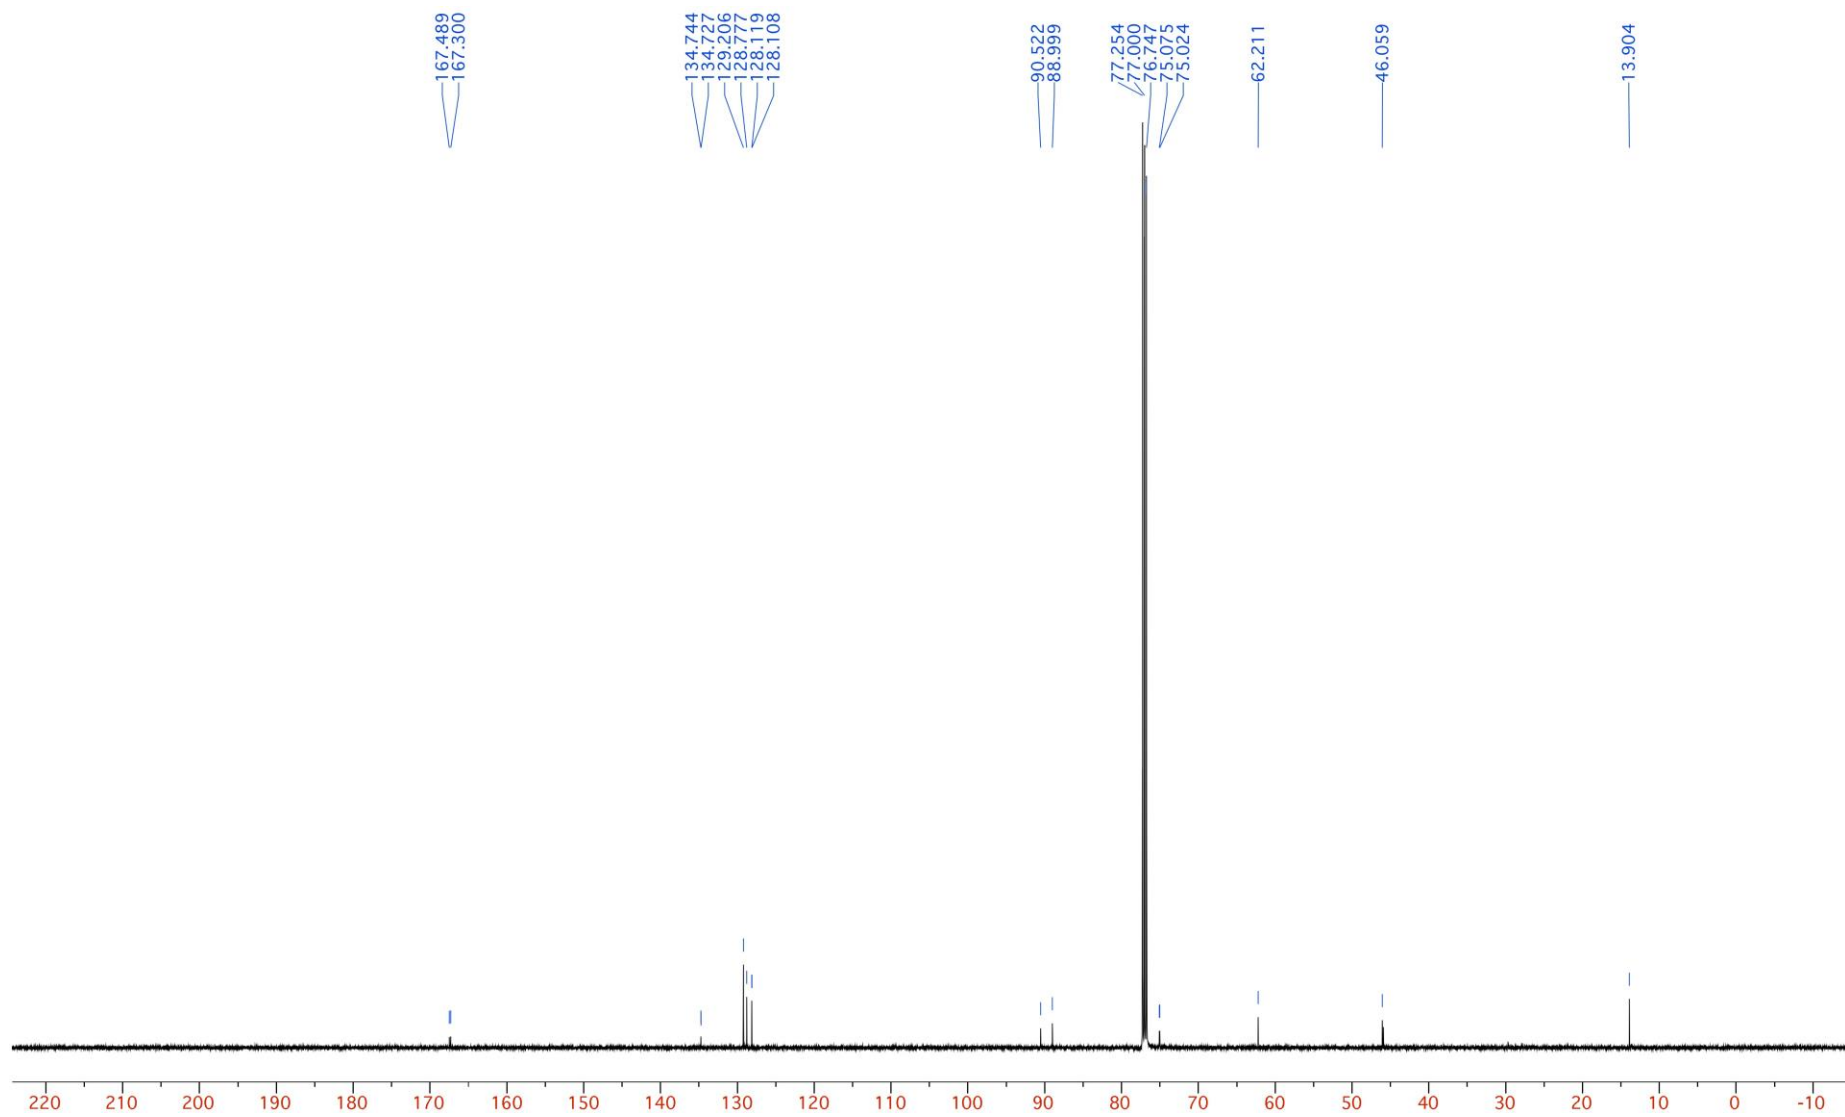

**((2S)-1-fluoro-1,3-dinitropropan-2-yl)benzene (10', pure minor diastereomer)**

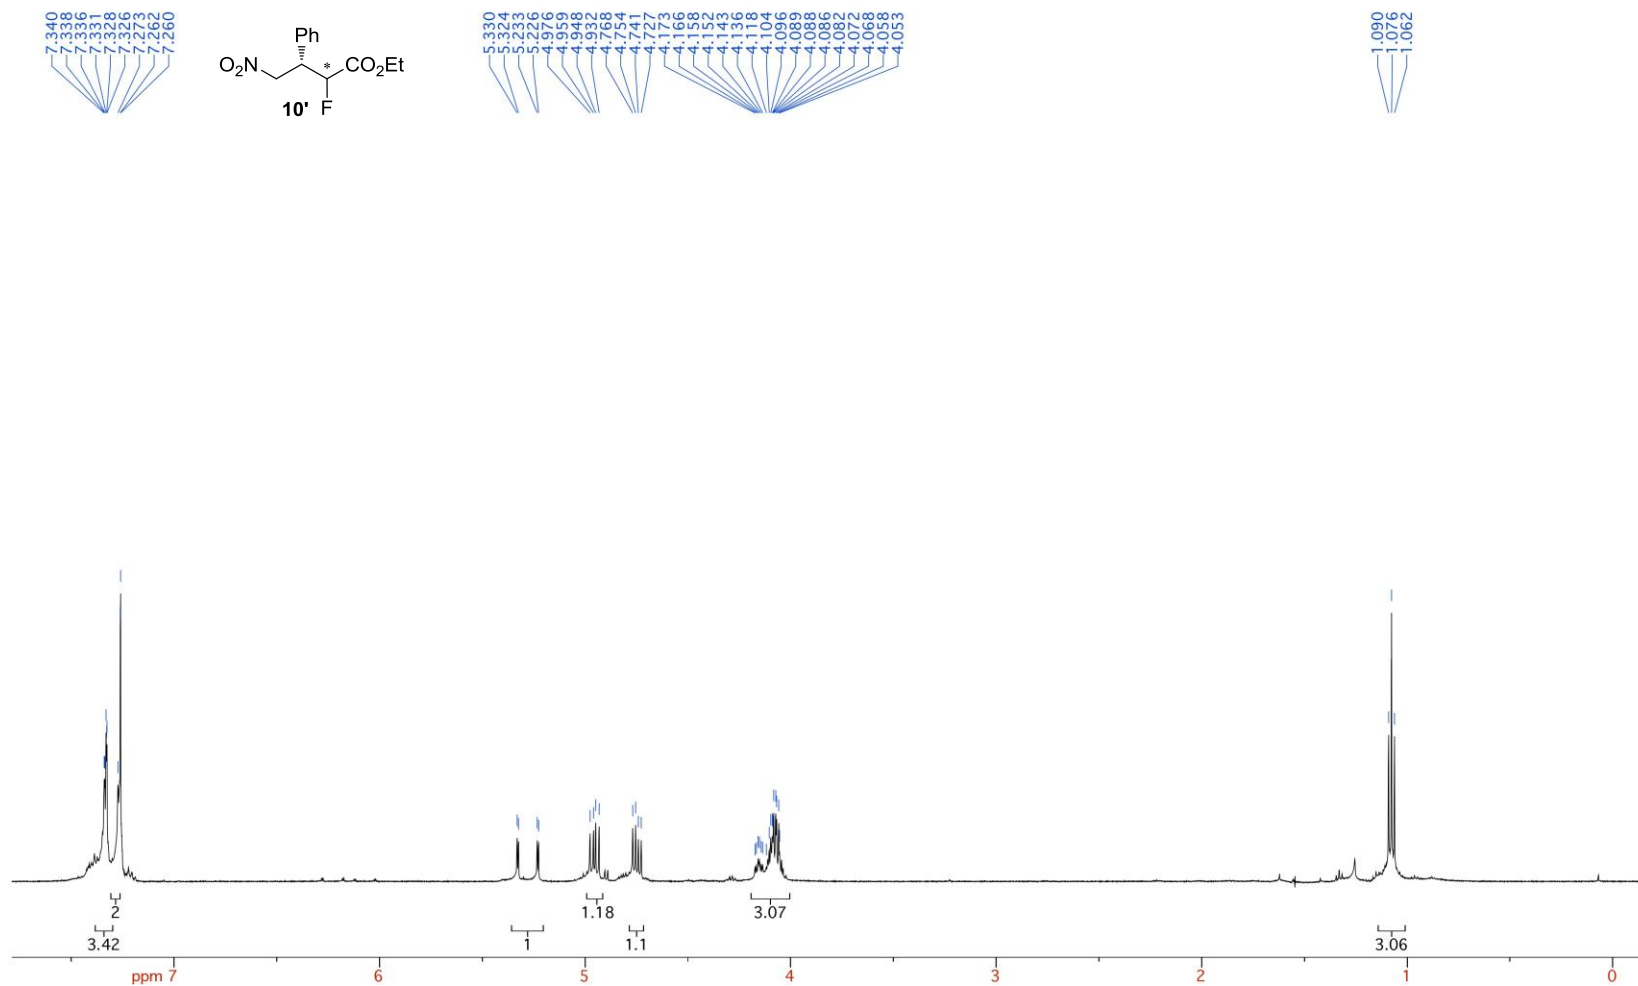

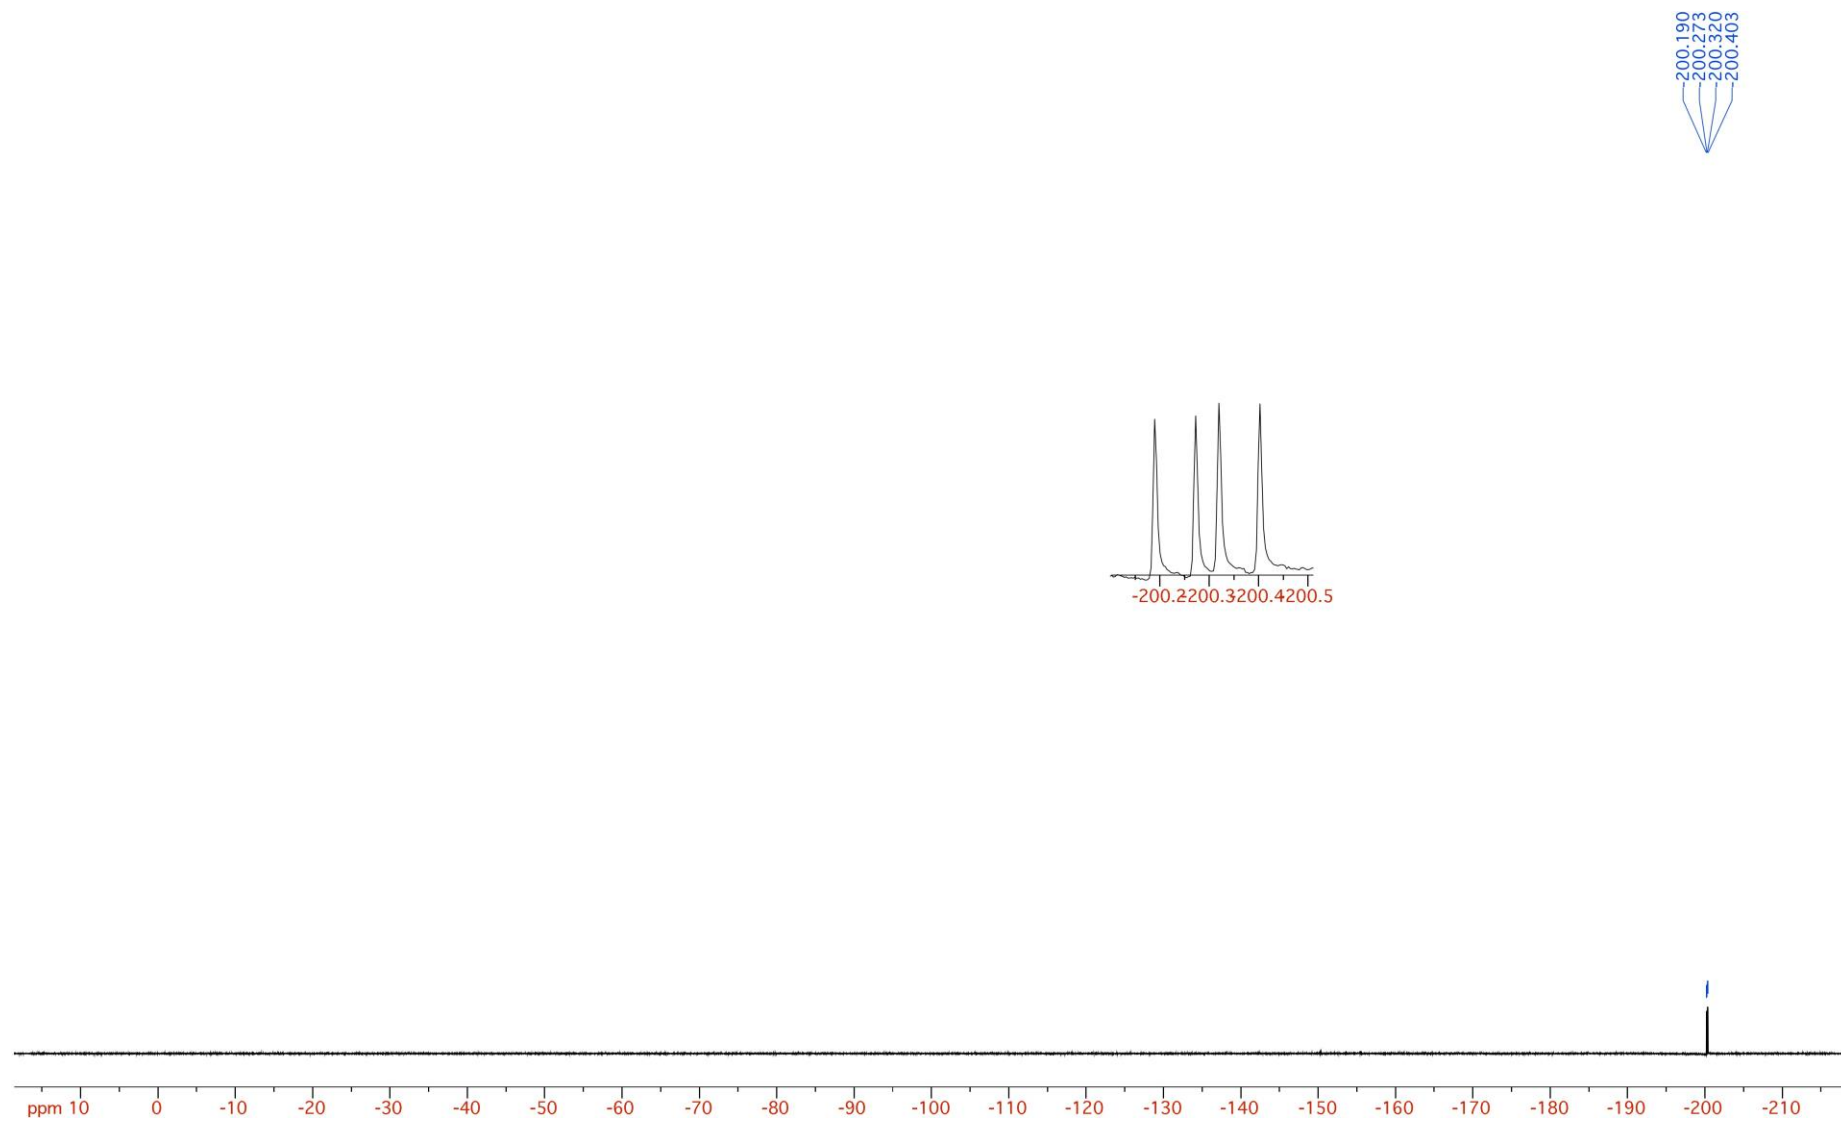

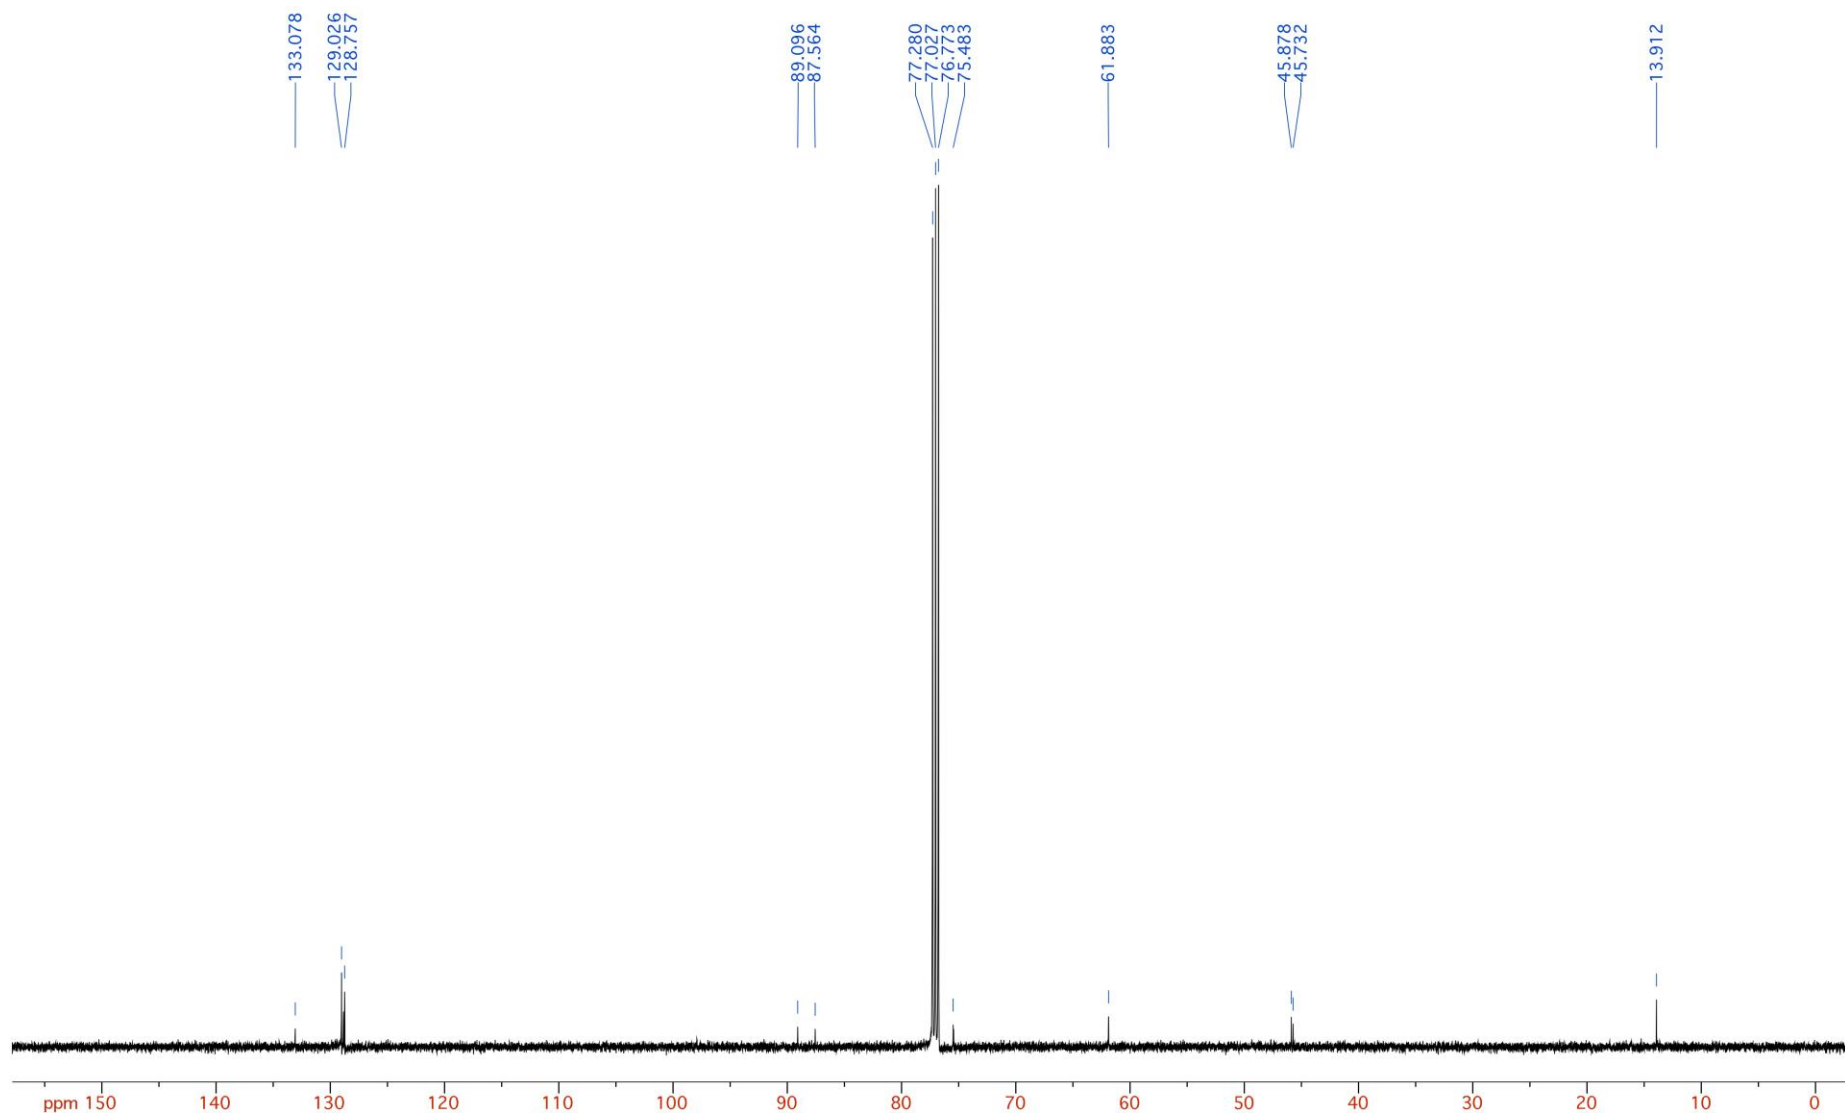



**((2S)-1-Fluoro-1,3-dinitropropan-2-yl)benzene (11, pure major diastereomer)**

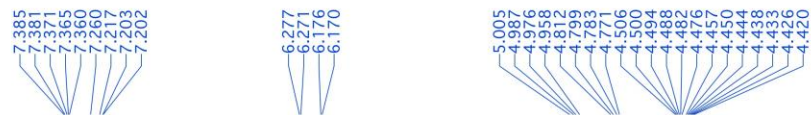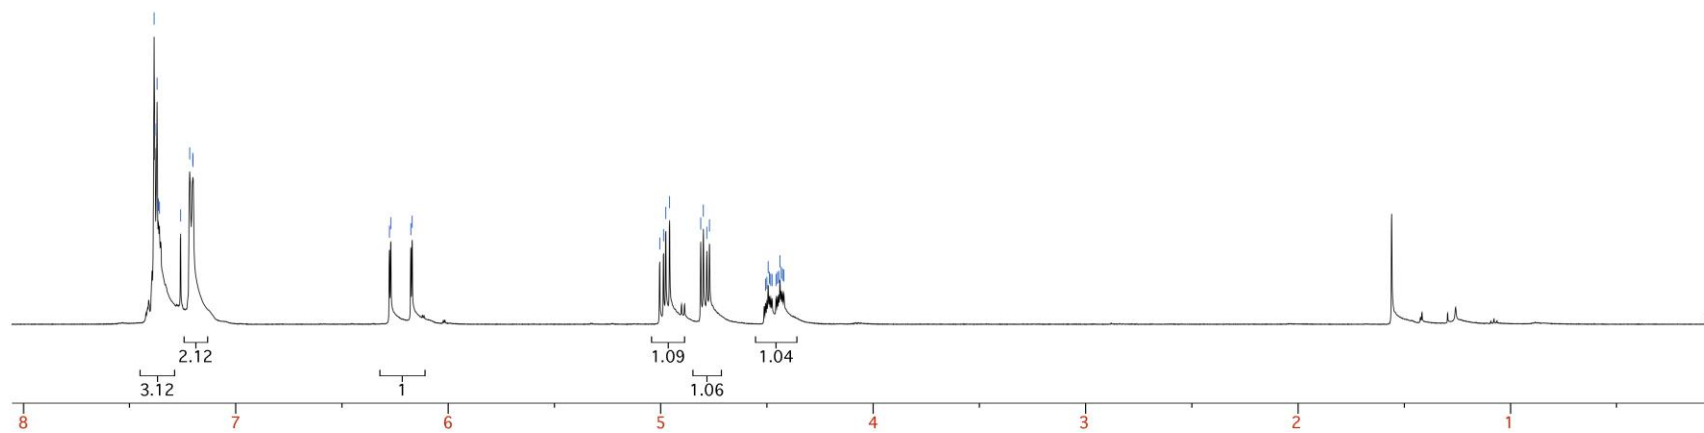

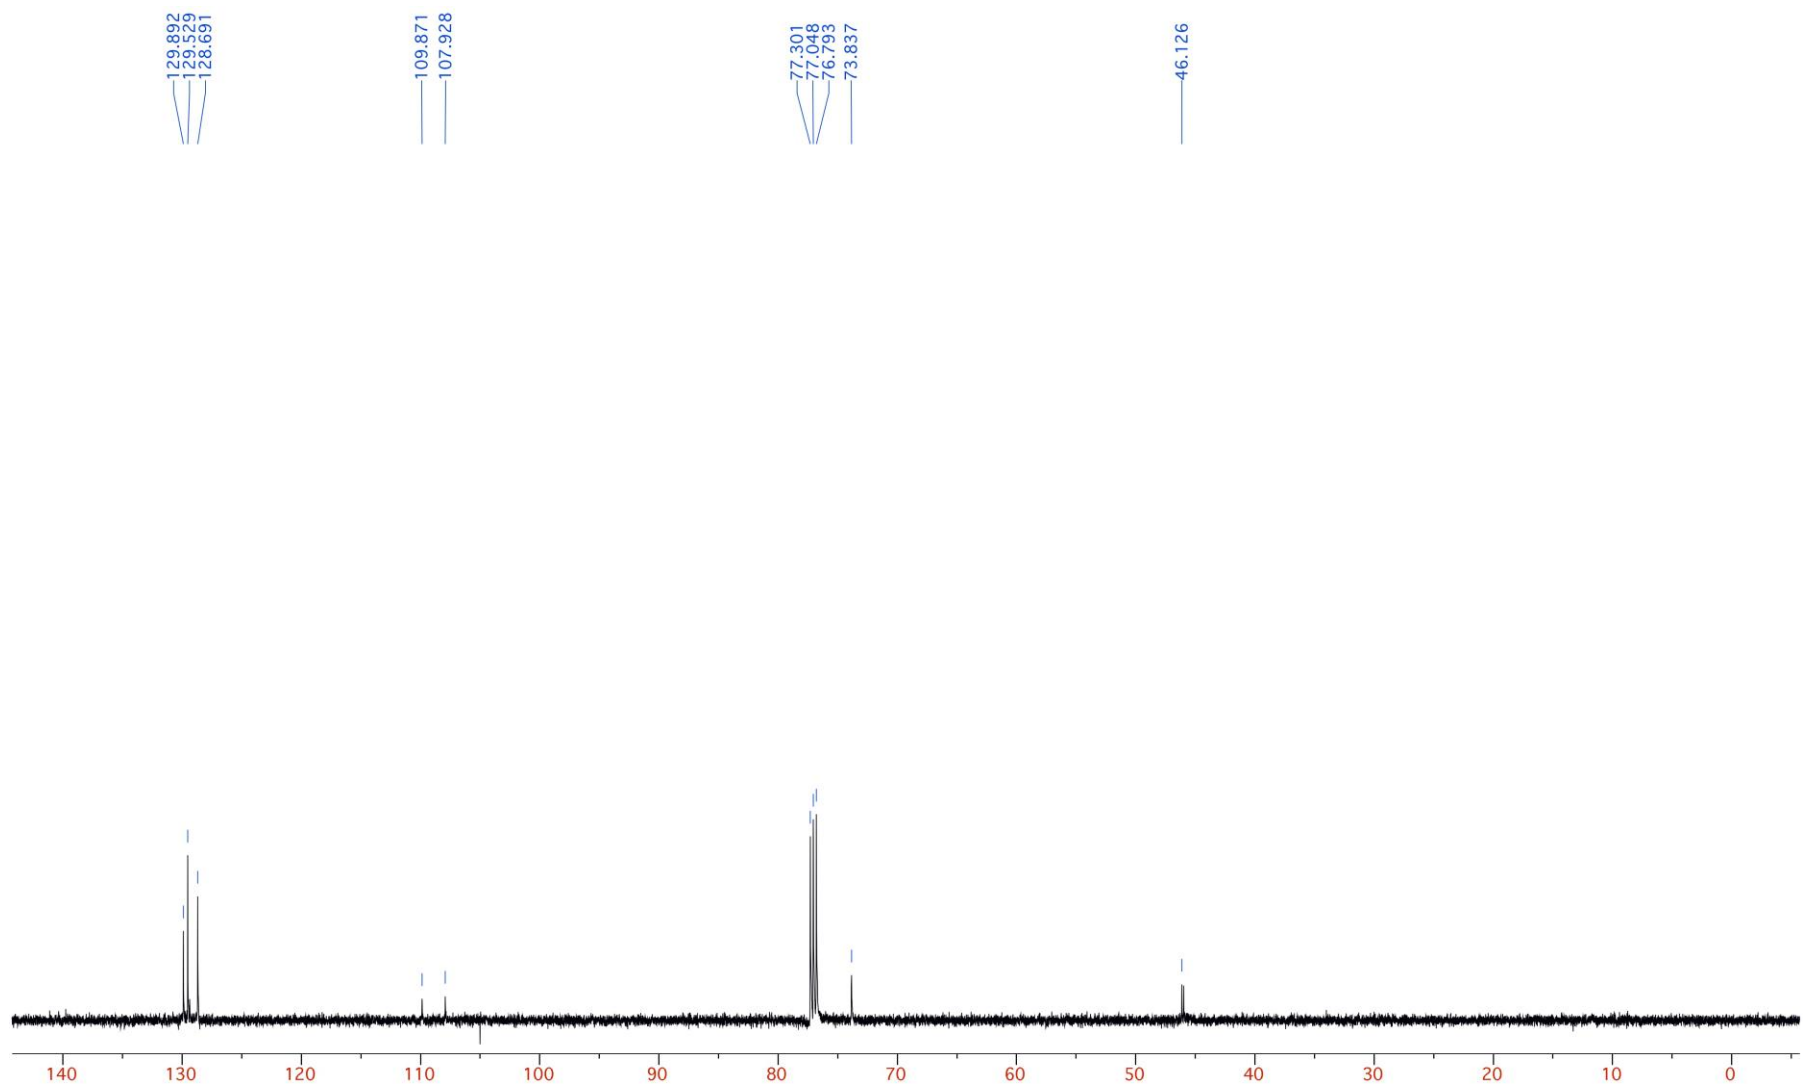

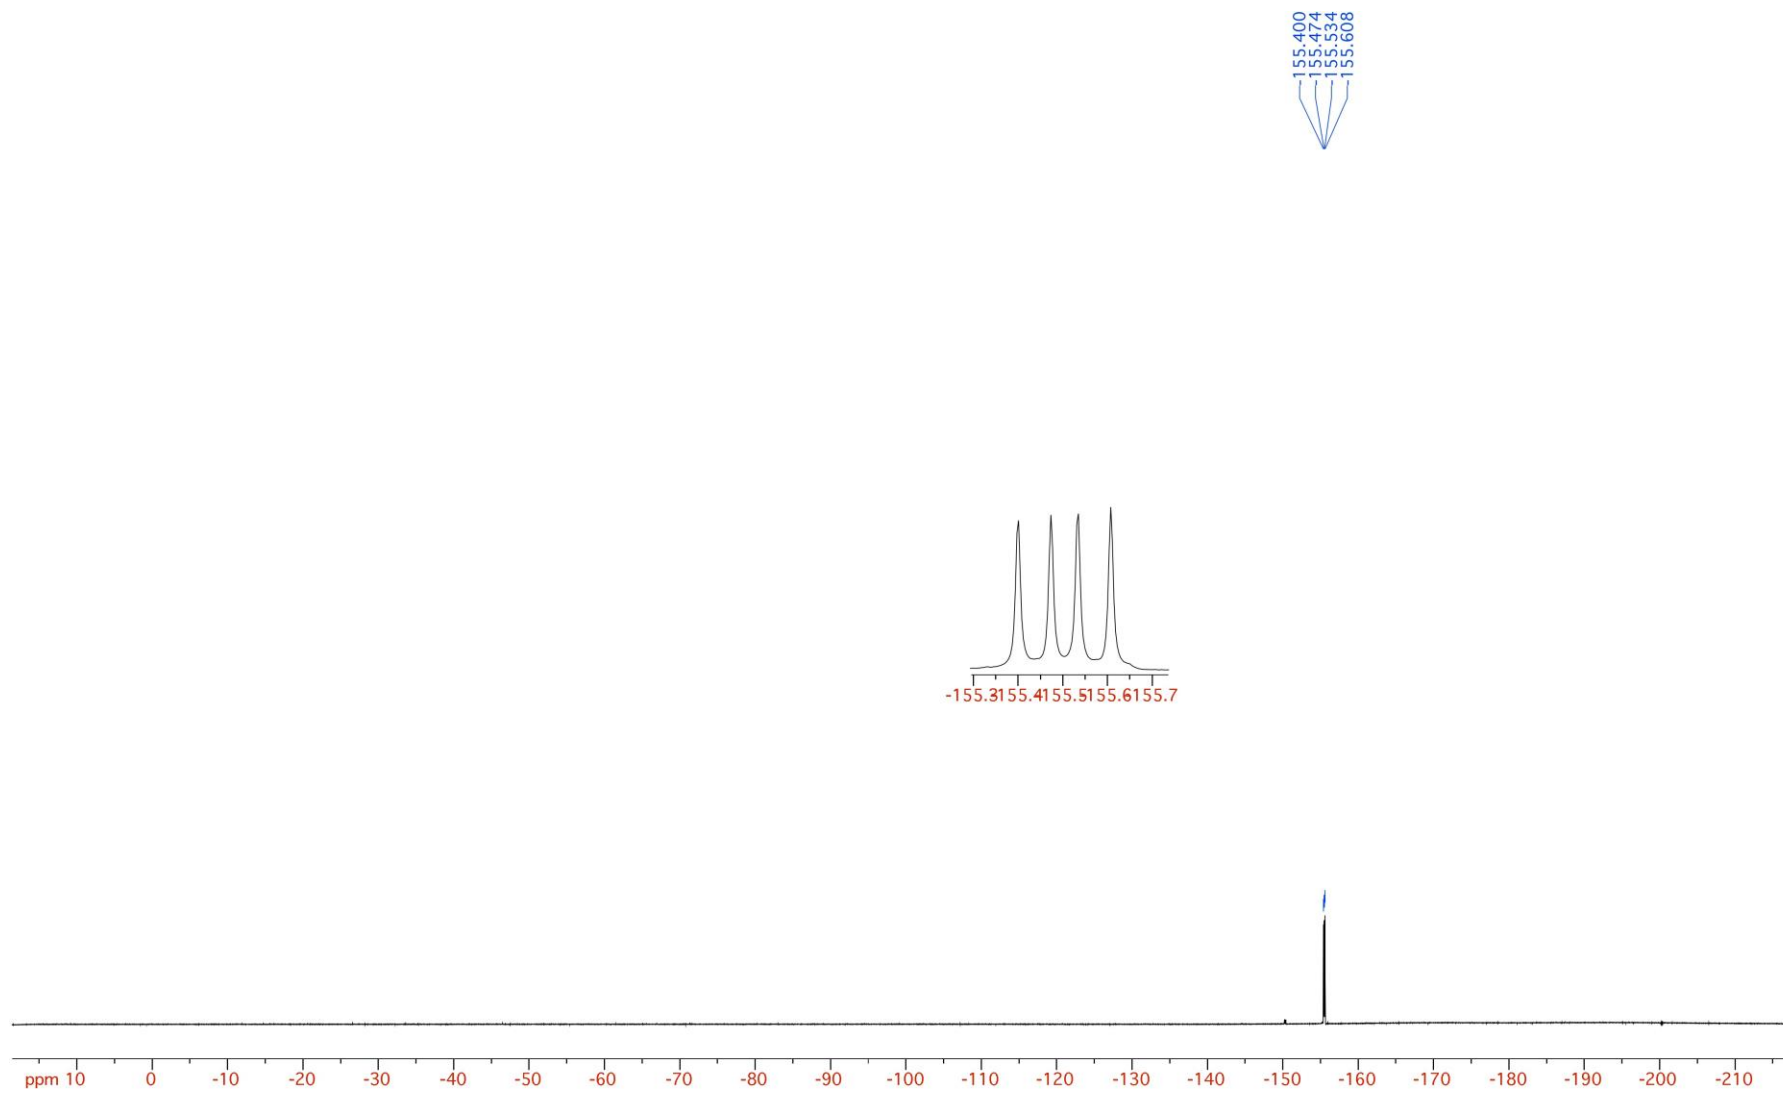

**((2S)-1-Fluoro-1,3-dinitropropan-2-yl)benzene (11', pure minor diastereomer)**

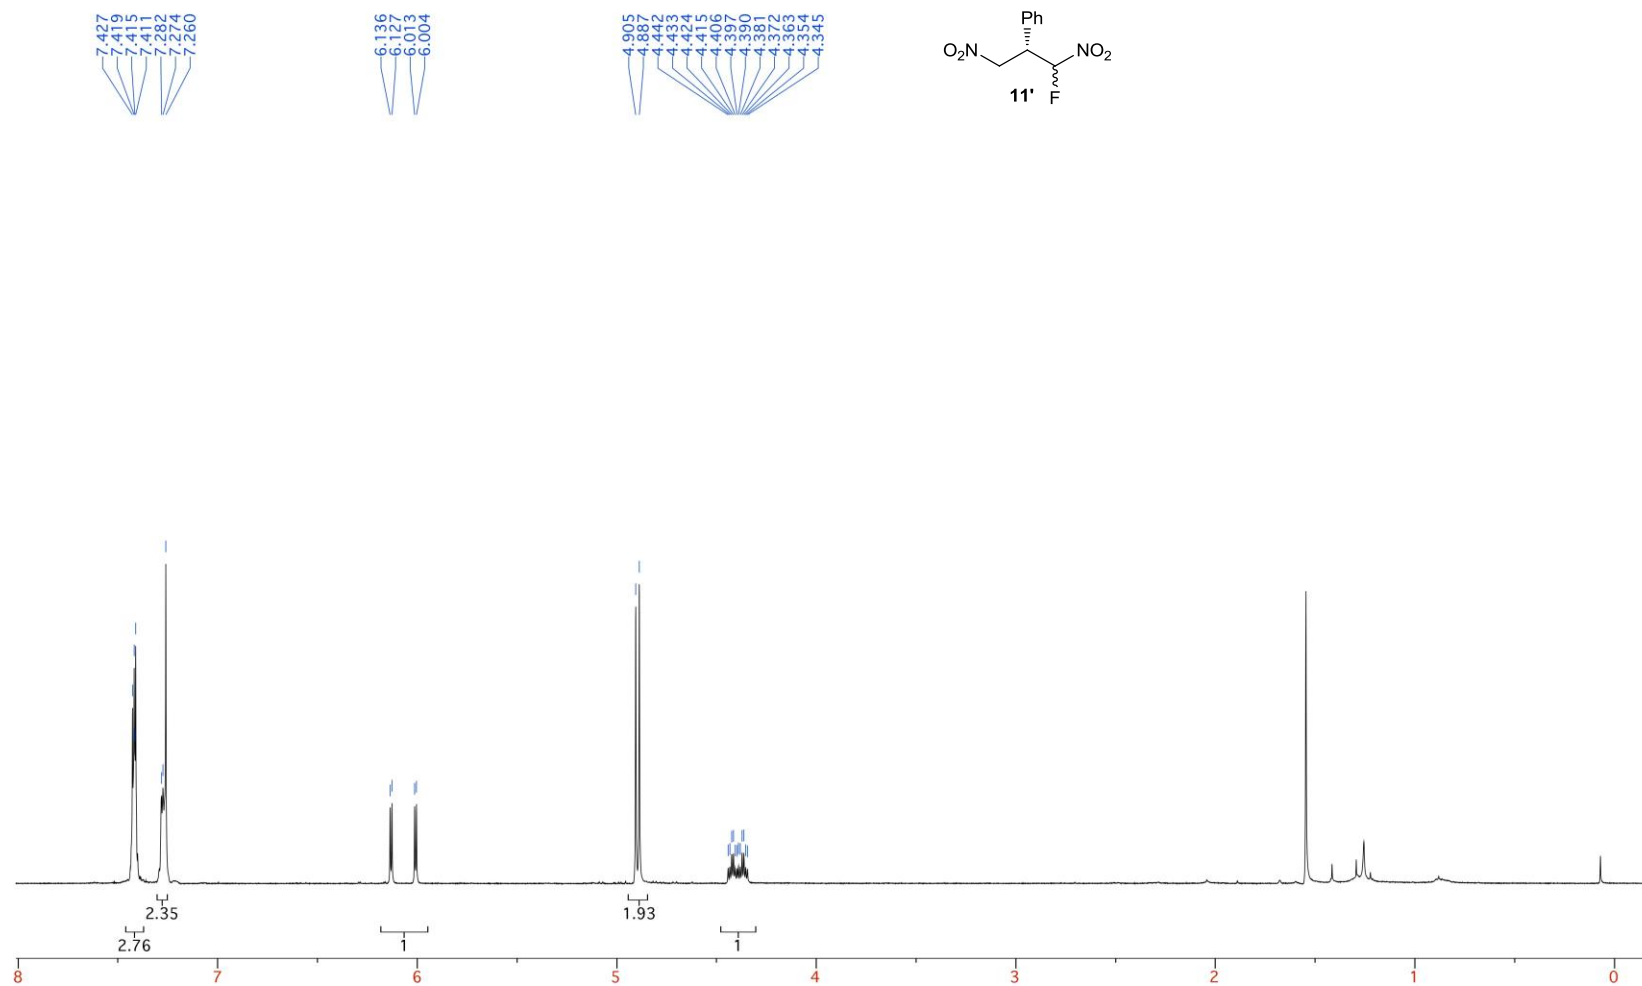

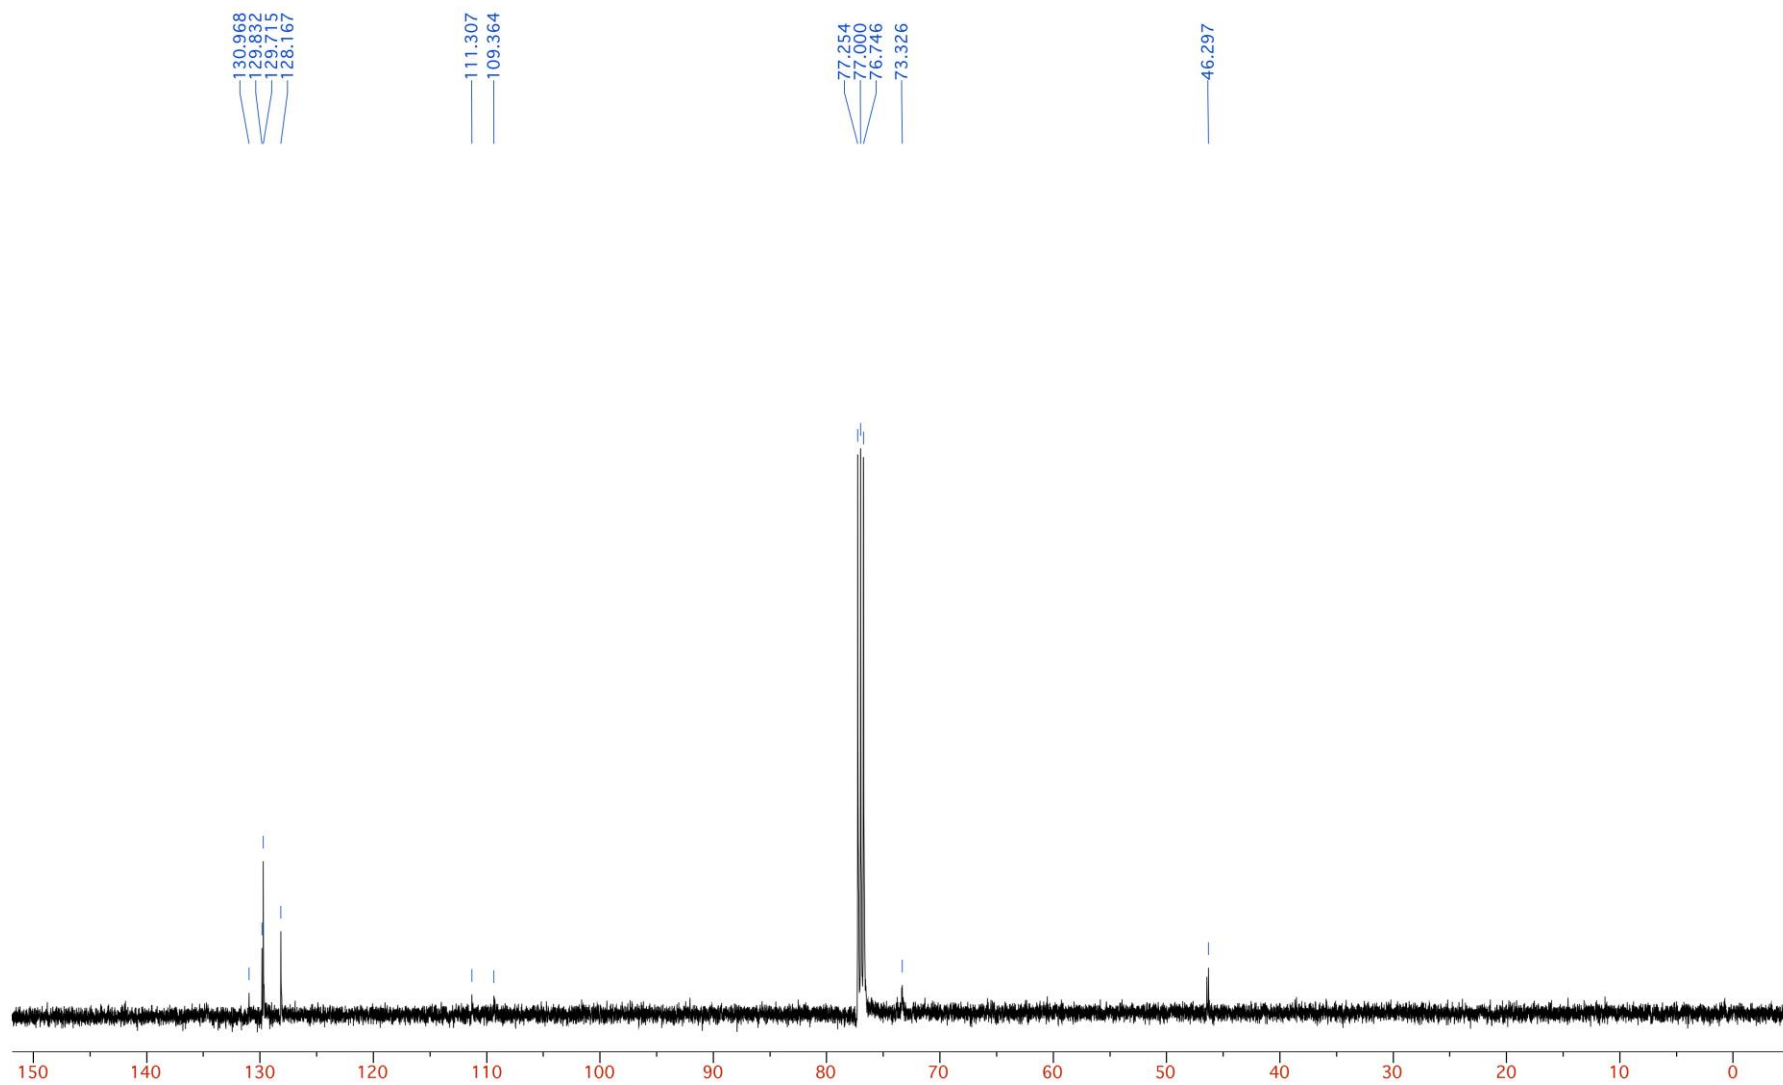

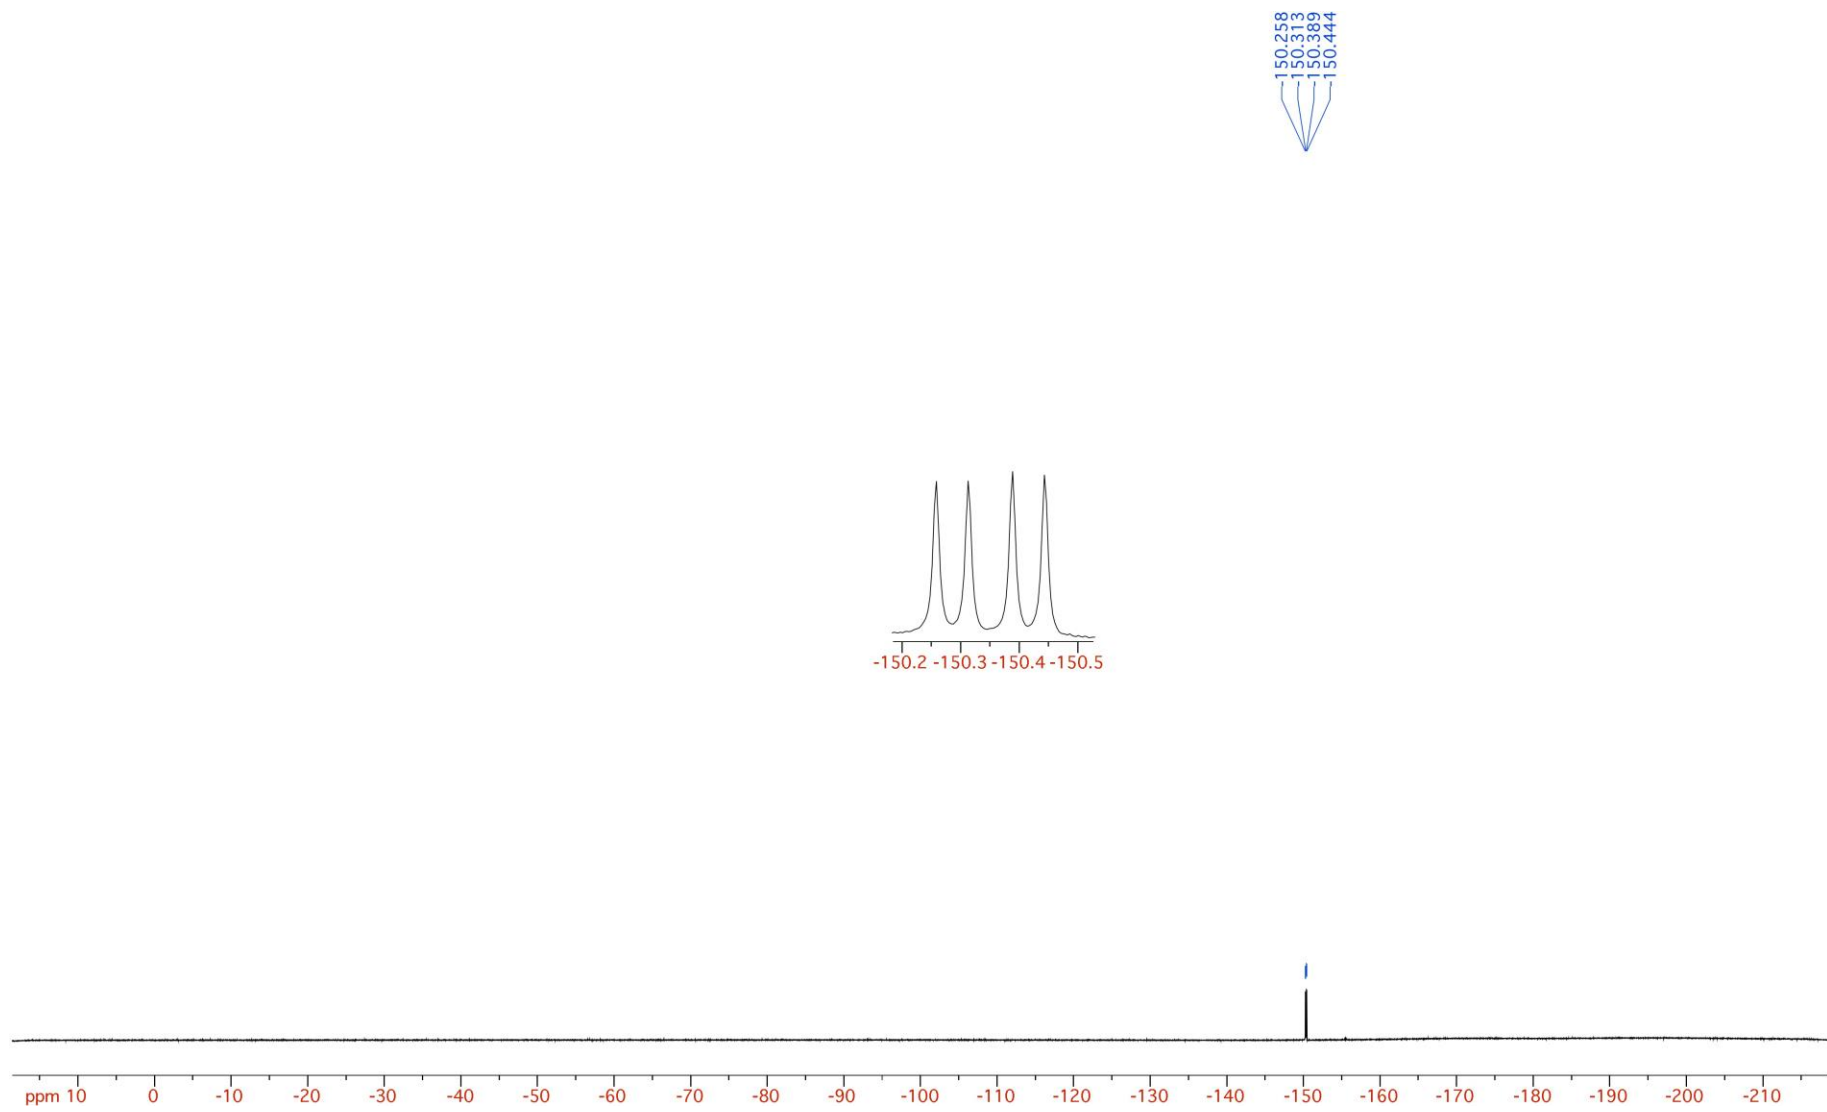

Ethyl 3-((tert-butoxycarbonyl)amino)-2-fluoro-2-nitro-3-phenylpropanoate (13, diastereomeric mixture)

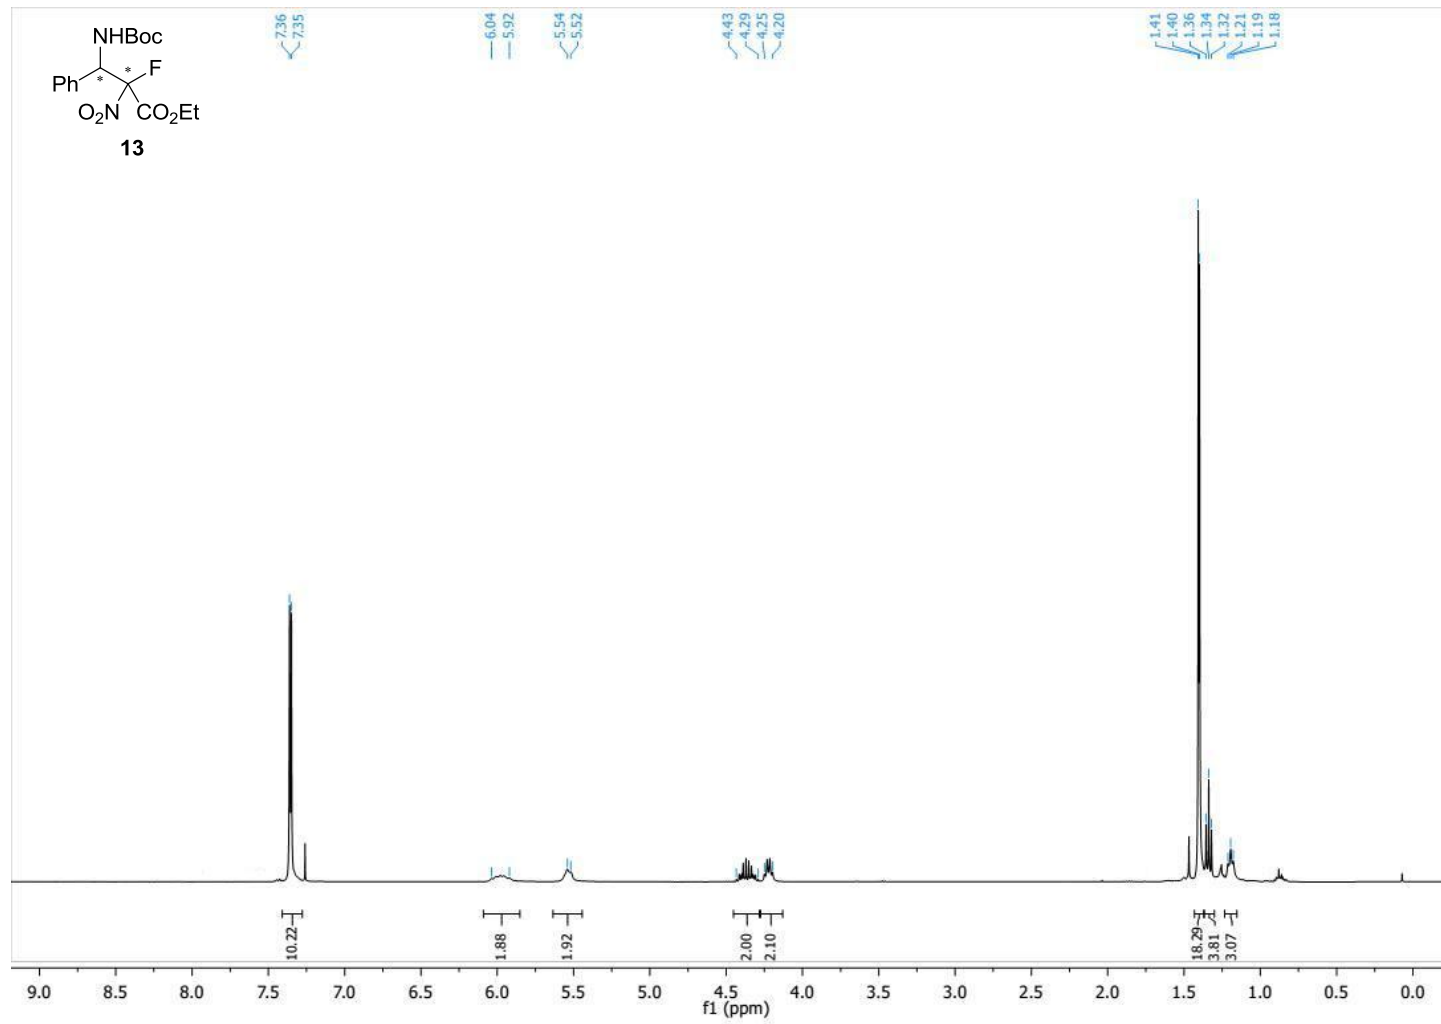

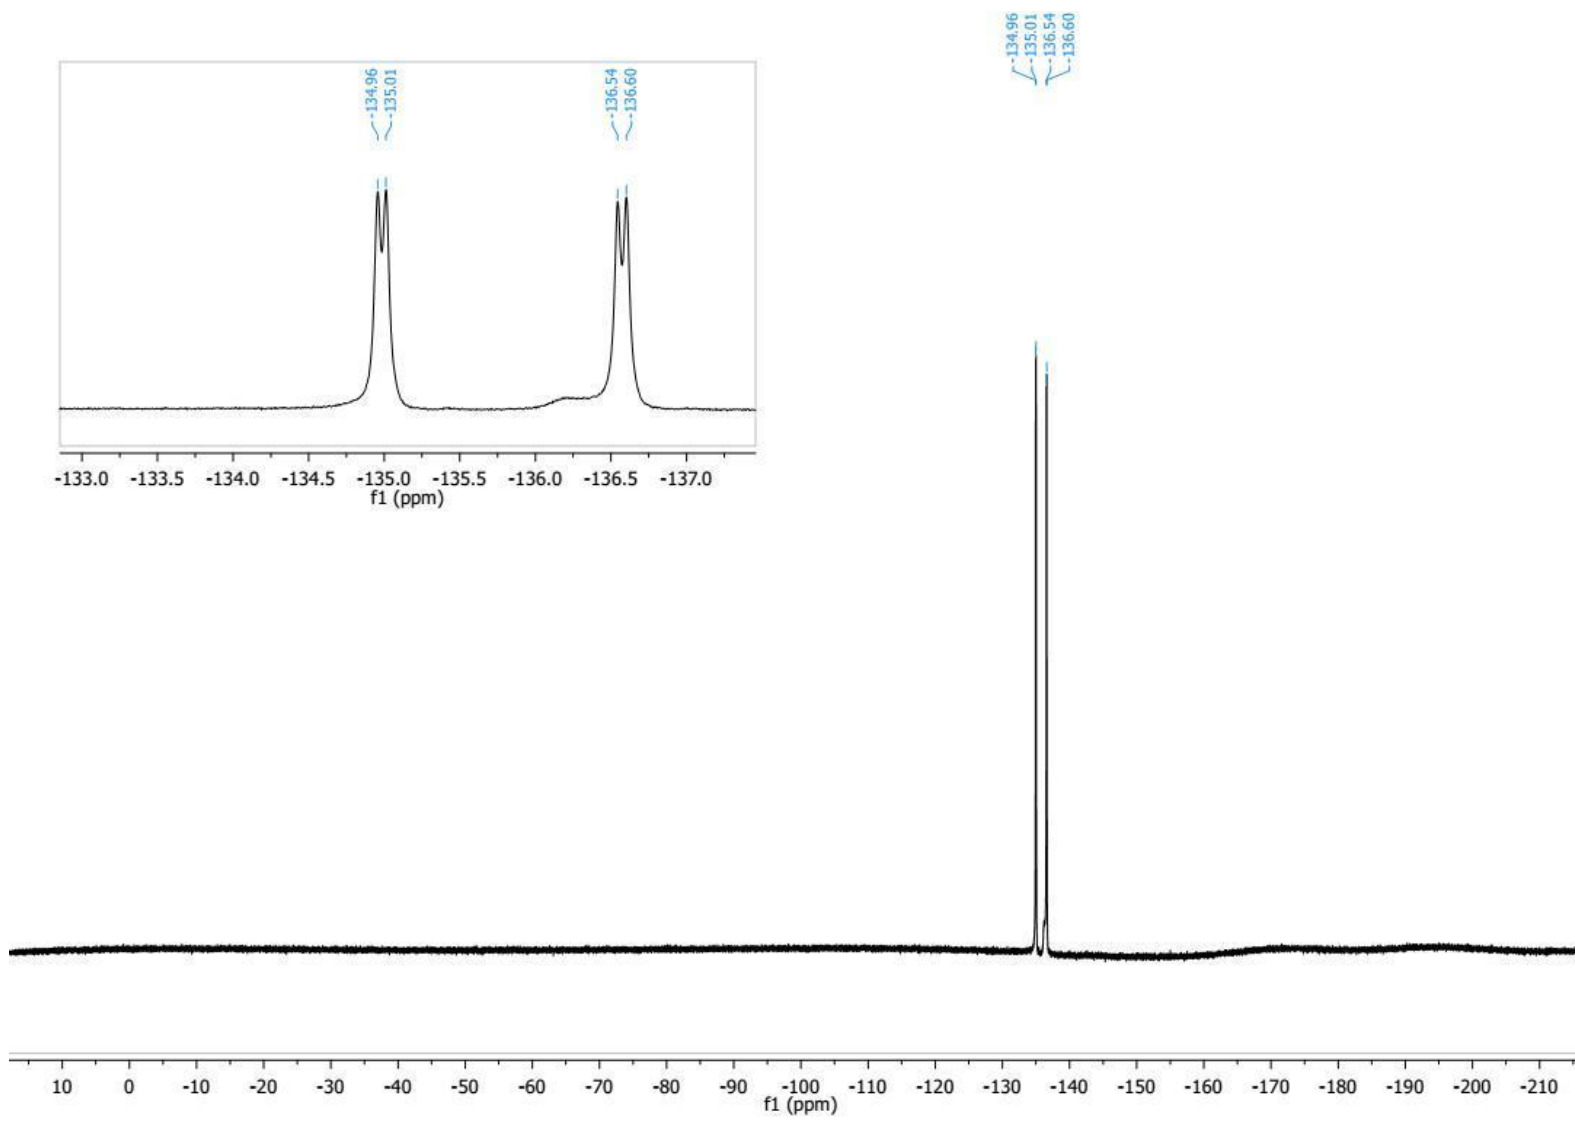



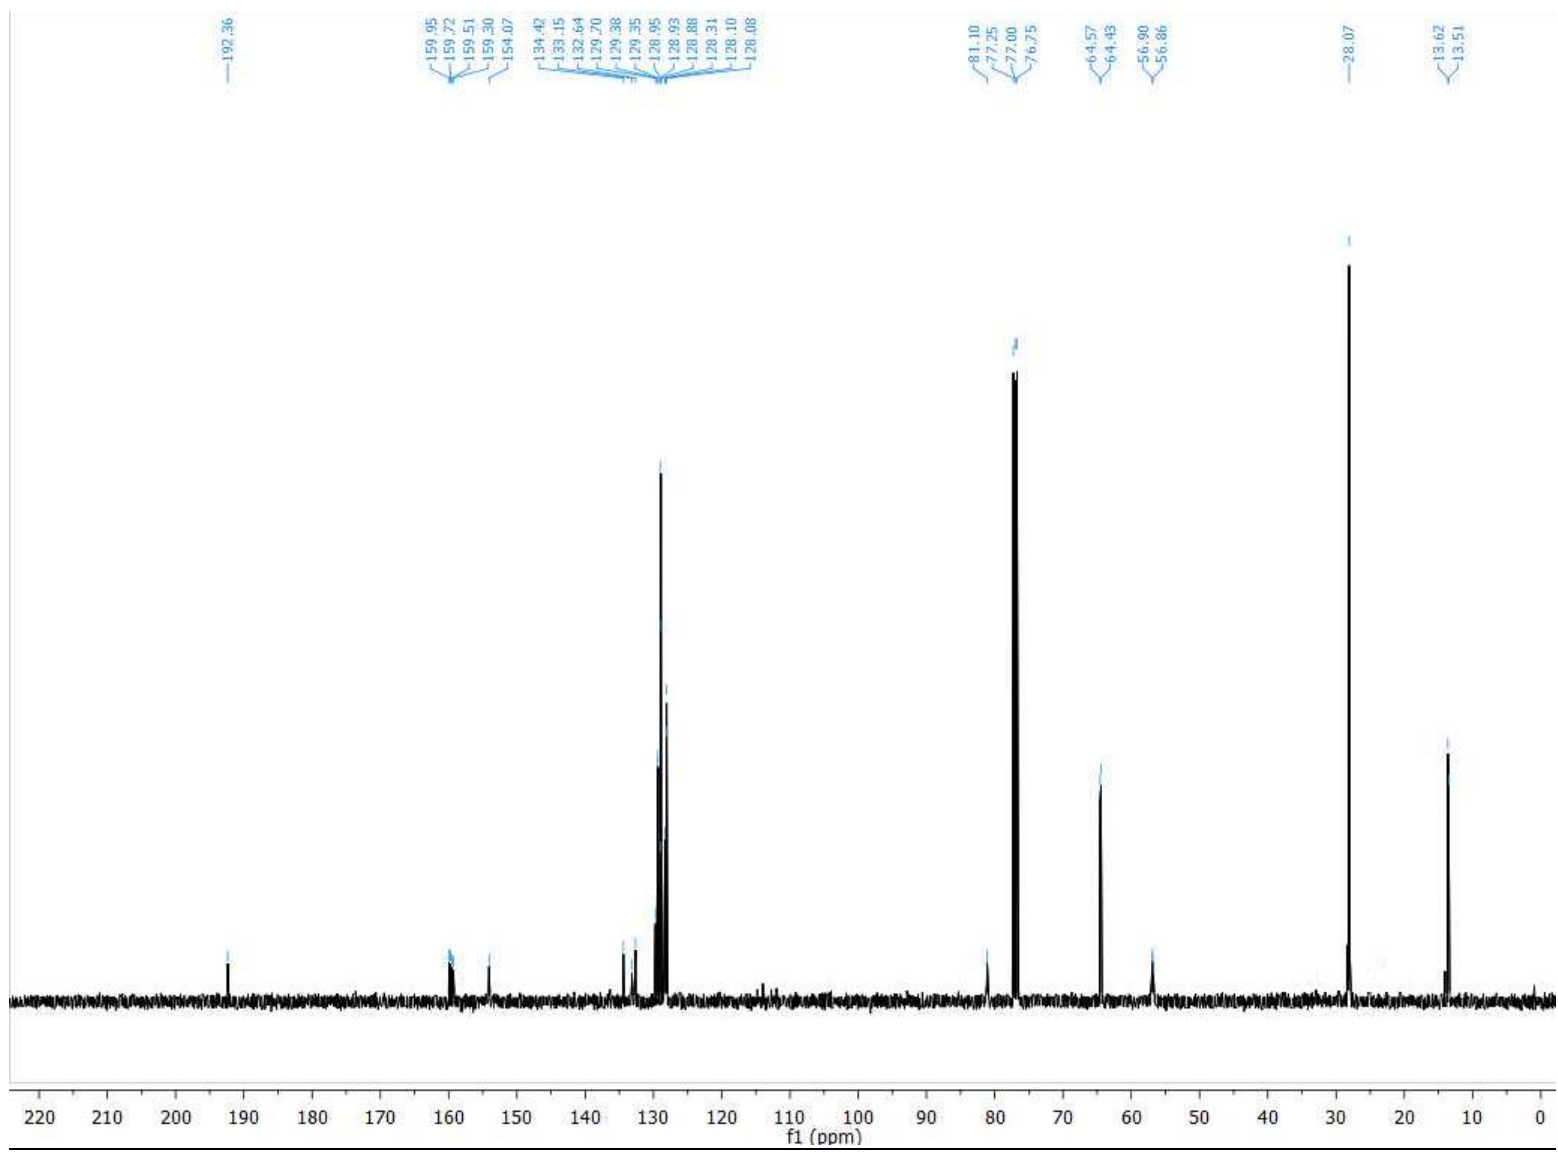

Supplement: c4ob02486a1.pdf [file c4ob02486a1.pdf]
